# Supplementary material
Source: PubMed Central journal article supplement (PMC3164120)
Supplement: NIHMS63227-supplement-1si20051010_10.pdf [file NIHMS63227-supplement-1si20051010_10.pdf]

# Origins of Enantioselectivity in Diels-Alder Cycloadditions Catalyzed by Chiral Imidazolidinones.

Ruth Gordillo and K. N. Houk\*

Department of Chemistry and Biochemistry, University of California Los Angeles, CA 90095-1569

[houk@chem.ucla.edu](mailto:houk@chem.ucla.edu)

## Supporting Information:

**Reference 18:** Frisch, M. J.; Trucks, G. W.; Schlegel, H. B.; Scuseria, G. E.; Robb, M. A.; Cheeseman, J. R.; Zakrzewski, V. G.; Montgomery, J. A. Jr.; Stratmann, R. E.; Burant, J. C.; Dapprich, S.; Millam, J. M.; Daniels, A. D.; Kudin, K. N.; Strain, M. C.; Farkas, O.; Tomasi, J.; Barone, V.; Cossi, M.; Cammi, R.; Mennucci, B.; Pomelli, C.; Adamo, C.; Clifford, S.; Ochterski, J.; Petersson, G. A.; Ayala, P. Y.; Cui, Q.; Morokuma, K.; Malick, D. K.; Rabuck, A. D.; Raghavachari, K.; Foresman, J. B.; Cioslowski, J.; Ortiz, J. V.; Stefanov, B. B.; Liu, G.; Liashenko, A.; Piskorz, P.; Komaromi, I. R.; Gomperts, R.; Martin, L.; Fox, D. J.; Keith, T.; Al-Laham, M. A.; Peng, C. Y.; Nanayakkara, A.; Gonzalez, C.; Challacombe, M. P.; Gill, M. W.; Johnson, B.; Chen, W.; Wong, M. W.; Andres, J. L.; Gonzalez, C.; Head-Gordon, M.; Replogle, E. S.; Pople, J. A. *Gaussian 98*, revision A.6; Gaussian, Inc.: Pittsburgh, PA, 1998.

**Reference 21:** Frisch, M. J.; Trucks, G. W.; Schlegel, H. B.; Scuseria, G. E.; Robb, M. A.; Cheeseman, J. R.; Montgomery, J. A. Jr.; Vreven, T.; Kudin, K. N.; Burant, J. C.; Millam, J. M.; Iyengar, S. S.; Tomasi, J.; Barone, V.; Mennucci, B.; Cossi, M.; Scalmani, G.; Rega, N.; Petersson, G. A.; Nakatsuji, H.; Hada, M.; Ehara, M.; Toyota, K.; Fukuda, R.; Hasegawa, J.; Ishida, M.; Nakajima, T.; Honda, Y.; Kitao, O.; Nakai, H.; Klene, M.; Li, X.; Knox, J. E.; Hratchian, H. P.; Cross, J. B.; Adamo, C.; Jaramillo, J.; Gomperts, R.; Stratmann, R. E.; Yazyev, O.; Austin, A. J.; Cammi, R.; Pomelli, C.; Ochterski, J. W.; Ayala, P. Y.; Morokuma, K.; Voth, G. A.; Salvador, P.; Dannenberg, J. J.; Zakrzewski, V. G.; Dapprich, S.; Daniels, A. D.; Strain, M. C.; Farkas, O.; Malick, D. K.; Rabuck, A. D.; Raghavachari, K.; Foresman, J. B.; Ortiz, J. V.; Cui, Q.; Baboul, A. G.; Clifford, S.; Cioslowski, J.; Stefanov, B. B.; Liu, G.; Liashenko, A.; Piskorz, P.; Komaromi, I.; Martin, R. L.; Fox, D. J.; Keith, T.; Al-Laham, M. A.; Peng, C. Y.; Nanayakkara, A.; Challacombe, M.; Gill, P. M. W.; Johnson, B.; Chen, W.; Wong, M. W.; Gonzalez, C.; Pople, J. A. *Gaussian 03*, revision B. 04; Gaussian, Inc.: Pittsburgh, PA, 2003.

## Molecular Geometries and Energies:

### Cyclopentadiene

B3LYP/6-31G(d) energy= -194.101058

Zero-point correction (ZPC)= 0.092896

Number of Imaginary Frequencies= 0

|   |           |           |           |           |
|---|-----------|-----------|-----------|-----------|
| C | -0.734452 | 0.991658  | 0.000154  | -0.114736 |
| C | 0.735513  | 0.990865  | 0.000111  | -0.114733 |
| C | 1.181003  | -0.282318 | -0.000356 | -0.133728 |
| C | -0.000649 | -1.217343 | 0.000364  | -0.345957 |
| C | -1.181309 | -0.281064 | -0.000382 | -0.133832 |
| H | -0.001001 | -1.882291 | -0.877372 | 0.167321  |
| H | -0.001009 | -1.881545 | 0.878690  | 0.167437  |
| H | 2.213730  | -0.611980 | -0.000558 | 0.128885  |
| H | 1.348418  | 1.886595  | 0.000215  | 0.125306  |
| H | -2.214390 | -0.609613 | -0.000607 | 0.128868  |
| H | -1.346389 | 1.888049  | 0.000288  | 0.125293  |

### 7 s-trans

B3LYP/6-31G(d) energy= -231.2341826

Zero-point correction (ZPC)= 0.090043

Number of Imaginary Frequencies=0

|   |           |           |           |           |
|---|-----------|-----------|-----------|-----------|
| C | -2.431373 | -0.166116 | 0.000246  | -0.495963 |
| C | -1.043436 | 0.391369  | -0.000116 | -0.077462 |
| C | 0.092190  | -0.324145 | -0.000466 | -0.142375 |
| C | 1.406135  | 0.333559  | -0.000145 | 0.229347  |
| O | 2.472149  | -0.253444 | 0.000355  | -0.415344 |

|   |           |           |           |          |
|---|-----------|-----------|-----------|----------|
| H | 1.366618  | 1.447577  | -0.000381 | 0.096340 |
| H | 0.088895  | -1.412536 | -0.000572 | 0.147077 |
| H | -0.962399 | 1.480700  | 0.000297  | 0.145079 |
| H | -2.989630 | 0.181637  | -0.879341 | 0.172312 |
| H | -2.432107 | -1.260111 | 0.000534  | 0.168710 |
| H | -2.989667 | 0.182286  | 0.879504  | 0.172300 |

### 7 s-cis

B3LYP/6-31G(d) energy= -231.2320827

Zero-point correction (ZPC)= 0.090103

Number of Imaginary Frequencies=0

|   |           |           |           |           |
|---|-----------|-----------|-----------|-----------|
| C | 2.322462  | -0.123228 | 0.000008  | -0.498059 |
| C | 0.838325  | -0.296893 | 0.000087  | -0.047317 |
| C | -0.067902 | 0.693709  | -0.000234 | -0.174042 |
| C | -1.519034 | 0.414999  | 0.000210  | 0.221115  |
| O | -2.015057 | -0.698095 | -0.000197 | -0.408830 |
| H | -2.169210 | 1.317184  | 0.000989  | 0.099778  |
| H | 0.237476  | 1.739311  | -0.000497 | 0.129711  |
| H | 0.455683  | -1.317766 | 0.000725  | 0.170046  |
| H | 2.615507  | 0.931248  | -0.000281 | 0.162773  |
| H | 2.769030  | -0.608127 | 0.878711  | 0.172422  |
| H | 2.768859  | -0.608614 | -0.878490 | 0.172449  |

### TS7 s-trans-endo

B3LYP/6-31G(d) energy= -425.3012094

Zero-point correction (ZPC)= 0.186137  
HF/6-31G(d)// B3LYP/6-31G(d) energy=-422.526363  
CPCM:HF/6-31G(d)// B3LYP/6-31G(d) ( $\epsilon=2.247$ ) energy=-422.530462  
CPCM:HF/6-31G(d)// B3LYP/6-31G(d) ( $\epsilon=78.39$ ) energy=-422.543286

Number of Imaginary Frequencies= 1

|   |           |           |           |
|---|-----------|-----------|-----------|
| C | 1.329212  | -1.183831 | -1.057001 |
| C | 0.328068  | -1.919952 | -0.406238 |
| C | 0.131538  | -1.383263 | 0.867228  |
| C | 1.324280  | -0.522064 | 1.180590  |
| C | 1.735313  | -0.122863 | -0.223633 |
| C | 0.187758  | 1.260861  | -0.469465 |
| C | -0.886338 | 0.712033  | 0.256998  |
| C | -2.026529 | 0.075525  | -0.395235 |
| O | -3.107808 | -0.144830 | 0.129047  |
| C | 0.857461  | 2.536958  | 0.008032  |
| H | -1.843930 | -0.207719 | -1.459007 |
| H | 1.154263  | 0.294059  | 1.884434  |
| H | 2.117526  | -1.165535 | 1.598450  |
| H | 0.106973  | 1.188664  | -1.553188 |
| H | -1.053556 | 1.016947  | 1.288208  |
| H | 2.628228  | 0.465113  | -0.416755 |
| H | -0.555185 | -1.770318 | 1.611292  |
| H | 1.036144  | 2.520769  | 1.089124  |
| H | 1.815184  | 2.713015  | -0.493350 |
| H | 0.214183  | 3.401556  | -0.201112 |
| H | -0.273428 | -2.701813 | -0.857186 |
| H | 1.631489  | -1.316521 | -2.090938 |

#### TS7 *s-trans-exo*

B3LYP/6-31G(d) energy= -425.3019534  
Zero-point correction (ZPC)= 0.186113  
HF/6-31G(d)// B3LYP/6-31G(d) energy= -422.526406  
CPCM:HF/6-31G(d)// B3LYP/6-31G(d) ( $\epsilon=2.247$ ) energy=-422.530353  
CPCM:HF/6-31G(d)// B3LYP/6-31G(d) ( $\epsilon=78.39$ ) energy=-422.542445

Number of Imaginary Frequencies= 1

|   |           |           |           |
|---|-----------|-----------|-----------|
| C | 0.570660  | -1.218744 | 1.147556  |
| C | 0.139375  | -1.613404 | -0.239167 |
| C | 1.175138  | -1.282970 | -1.108784 |
| C | 2.050121  | -0.397007 | -0.456881 |
| C | 1.531034  | -0.094231 | 0.817100  |
| C | 0.030688  | 1.292294  | 0.379053  |
| C | 0.781099  | 2.431534  | -0.280671 |
| C | -0.932099 | 0.562498  | -0.342213 |
| C | -2.168018 | 0.091272  | 0.272470  |
| O | -3.144439 | -0.328955 | -0.330829 |
| H | -2.180325 | 0.148687  | 1.388169  |
| H | -0.939629 | 0.596795  | -1.428105 |
| H | -0.208865 | 1.466395  | 1.429942  |
| H | 1.154829  | -2.049479 | 1.578527  |
| H | -0.229297 | -0.977822 | 1.849206  |
| H | -0.669109 | -2.303024 | -0.452578 |
| H | 2.113180  | 0.411491  | 1.583145  |
| H | 1.679676  | 2.712434  | 0.279998  |
| H | 1.081820  | 2.167904  | -1.299862 |
| H | 0.140307  | 3.320979  | -0.345963 |
| H | 1.237531  | -1.575171 | -2.151706 |
| H | 2.907419  | 0.085001  | -0.914914 |

#### TS7 *s-cis-endo*

B3LYP/6-31G(d) energy= -425.3043932

Zero-point correction (ZPC)= 0.186389  
HF/6-31G(d)// B3LYP/6-31G(d) energy= -422.527491  
CPCM:HF/6-31G(d)// B3LYP/6-31G(d) ( $\epsilon=2.247$ ) energy=-422.531043  
CPCM:HF/6-31G(d)// B3LYP/6-31G(d) ( $\epsilon=78.39$ ) energy=-422.541986

Number of Imaginary Frequencies= 1

|   |           |           |           |           |
|---|-----------|-----------|-----------|-----------|
| C | -0.798233 | -1.047245 | -1.225939 | -0.062794 |
| C | -1.694950 | -0.980295 | -0.145613 | -0.082769 |
| C | -0.992858 | -1.165160 | 1.033398  | -0.137052 |
| C | 0.360620  | -1.719501 | 0.692472  | -0.298797 |
| C | 0.516704  | -1.210432 | -0.733518 | -0.176642 |
| C | 1.150279  | 0.644829  | -0.303179 | -0.109475 |
| C | 0.343227  | 1.076113  | 0.769099  | -0.170831 |
| C | -0.879688 | 1.798167  | 0.504125  | 0.227723  |
| O | -1.338899 | 1.991864  | -0.622339 | -0.467739 |
| C | 2.642918  | 0.455684  | -0.098412 | -0.457960 |
| H | -1.423023 | 2.169726  | 1.401011  | 0.079225  |
| H | 1.165300  | -1.461671 | 1.383132  | 0.153335  |
| H | 0.294897  | -2.820450 | 0.659791  | 0.170034  |
| H | 0.882779  | 1.096905  | -1.255512 | 0.175785  |
| H | 0.688926  | 1.004258  | 1.797510  | 0.118594  |
| H | 1.322166  | -1.562318 | -1.373392 | 0.139472  |
| H | -1.417290 | -1.169137 | 2.031043  | 0.141488  |
| H | 2.869302  | -0.053851 | 0.844910  | 0.147711  |
| H | 3.103985  | -0.113600 | -0.912784 | 0.146785  |
| H | 3.136085  | 1.435443  | -0.065387 | 0.165483  |
| H | -2.741086 | -0.708251 | -0.223812 | 0.148634  |
| H | -1.058971 | -0.864923 | -2.262396 | 0.149826  |

#### TS7 *s-cis-exo*

B3LYP/6-31G(d) energy= -425.3055613  
Zero-point correction (ZPC)= 0.186393  
HF/6-31G(d)// B3LYP/6-31G(d) energy= -422.528551  
CPCM:HF/6-31G(d)// B3LYP/6-31G(d) ( $\epsilon=2.247$ ) energy=-422.531691  
CPCM:HF/6-31G(d)// B3LYP/6-31G(d) ( $\epsilon=78.39$ ) energy=-422.541748

Number of Imaginary Frequencies= 1

|   |           |           |           |
|---|-----------|-----------|-----------|
| C | 0.324837  | -1.255824 | 1.002877  |
| C | 0.461045  | -1.639830 | -0.440052 |
| C | 1.633410  | -1.076969 | -0.933508 |
| C | 2.096034  | -0.115516 | -0.019713 |
| C | 1.158589  | 0.009577  | 1.028414  |
| C | -0.270751 | 1.236444  | 0.233041  |
| C | 0.477973  | 2.505691  | -0.122479 |
| C | -0.899768 | 0.481055  | -0.776124 |
| C | -2.143889 | -0.232599 | -0.552947 |
| O | -2.676740 | -0.426431 | 0.538718  |
| H | -2.623699 | -0.624453 | -1.477765 |
| H | -0.591536 | 0.601526  | -1.811516 |
| H | -0.839858 | 1.289920  | 1.160852  |
| H | 0.835100  | -2.018008 | 1.616599  |
| H | -0.700742 | -1.162337 | 1.366094  |
| H | -0.099116 | -2.441281 | -0.908623 |
| H | 1.391753  | 0.523036  | 1.957817  |
| H | 1.147760  | 2.827590  | 0.682909  |
| H | 1.073702  | 2.377470  | -1.032430 |
| H | -0.233010 | 3.322314  | -0.304889 |
| H | 2.072557  | -1.284564 | -1.903847 |
| H | 2.956137  | 0.528046  | -0.172000 |

#### 8 *s-trans*

B3LYP/6-31G(d) energy= -309.8707514000

Zero-point correction (ZPC)= 0.147196

Number of Imaginary Frequencies=0

C 3.244576 -0.316918 0.000015 -0.493412  
C 1.750258 -0.426563 0.000056 -0.079484  
C 0.904881 0.614805 -0.000179 -0.166693  
C -0.578082 0.536579 0.000001 0.446809  
C -1.261039 -0.830624 0.000012 -0.361879  
C -2.785723 -0.734045 -0.000063 -0.432084  
O -1.233562 1.569868 0.000140 -0.468324  
H 1.285961 1.635110 -0.000422 0.140296  
H 1.349974 -1.440383 0.000331 0.141019  
H 3.673094 -0.815456 0.879929 0.167117  
H 3.673108 -0.816076 -0.879538 0.167101  
H 3.574324 0.726401 -0.000357 0.166848  
H -0.907833 -1.394675 0.874856 0.157238  
H -0.907723 -1.394743 -0.874745 0.157255  
H -3.234164 -1.733202 0.000036 0.136096  
H -3.143754 -0.192570 0.880351 0.161051  
H -3.143715 -0.192752 -0.880606 0.161026

### 8 s-cis

B3LYP/6-31G(d) energy=-309.8722712000

Zero-point correction (ZPC)= 0.146965

Number of Imaginary Frequencies=0

C -3.345553 -0.247099 0.000067 -0.497853  
C -1.945746 0.279199 0.000092 -0.054181  
C -0.829927 -0.463486 -0.000219 -0.182283  
C 0.521824 0.162017 -0.000081 0.438247  
O 0.679685 1.374766 -0.000088 -0.471398  
C 1.705546 -0.799091 0.000104 -0.359230  
H -0.884365 -1.551765 -0.000496 0.122006  
H -1.817877 1.361815 0.000400 0.165838  
H -3.896607 0.114290 0.878920 0.168937  
H -3.896696 0.114675 -0.878574 0.168942  
H -3.375054 -1.341353 -0.000177 0.159296  
H 1.600073 -1.461585 0.873005 0.158199  
H 1.600155 -1.461926 -0.872543 0.158174  
C 3.062594 -0.100928 0.000051 -0.433146  
H 3.876027 -0.834124 0.000259 0.137310  
H 3.172284 0.538893 -0.880671 0.160581  
H 3.172153 0.539286 0.880501 0.160606

### TS8 s-trans-endo

B3LYP/6-31G(d) energy=-503.9365273000

Zero-point correction (ZPC)= 0.2431470000

HF/6-31G(d)// B3LYP/6-31G(d) energy=-500.602436

CPCM:HF/6-31G(d)// B3LYP/6-31G(d) ( $\epsilon=78.39$ ) energy=-500.616229

Number of Imaginary Frequencies= 1

C 0.820988 -1.268675 1.109594 -0.130428  
C 2.178501 -0.667924 0.861844 -0.295954  
C 2.110723 -0.483247 -0.641793 -0.157288  
C 1.255744 -1.497340 -1.113384 -0.094797  
C 0.454298 -1.948909 -0.052616 -0.103033  
C 0.827947 1.198773 -0.513427 -0.122961  
C 0.001404 0.897077 0.584841 -0.192109  
C -1.426306 0.528746 0.520300 0.468185  
O -2.109860 0.506269 1.539959 -0.502082  
C 1.848033 2.318982 -0.413752 -0.453668  
H 2.425656 0.218167 1.447944 0.154648  
H 2.942437 -1.434609 1.077485 0.170076  
H 0.384355 1.105325 -1.501502 0.143993  
H 0.286418 1.268588 1.567298 0.136685  
H 2.952061 -0.107849 -1.217498 0.133687

H 0.399340 -1.439260 2.093543 0.158083  
H 2.357853 2.319889 0.555987 0.151295  
H 2.608566 2.258206 -1.199788 0.145366  
H 1.349593 3.292096 -0.516509 0.161769  
H -0.389830 -2.624144 -0.144346 0.141296  
H 1.137144 -1.782023 -2.154108 0.134014  
C -2.052122 0.223474 -0.842362 -0.362044  
H -1.390404 -0.449471 -1.403711 0.149262  
H -2.067901 1.161496 -1.417562 0.153335  
C -3.461742 -0.355257 -0.733602 -0.432441  
H -4.114324 0.318493 -0.172120 0.165744  
H -3.893388 -0.517094 -1.727380 0.130722  
H -3.453515 -1.312169 -0.201260 0.148685

### TS8 s-trans-exo

B3LYP/6-31G(d) energy=-503.9349032000

Zero-point correction (ZPC)=0.2431310000

HF/6-31G(d)// B3LYP/6-31G(d) energy=-500.599979

CPCM:HF/6-31G(d)// B3LYP/6-31G(d) ( $\epsilon=78.39$ ) energy=-500.612769

Number of Imaginary Frequencies= 1

C -2.086852 -1.331686 0.810046 -0.097762  
C -2.760681 -0.446106 -0.046778 -0.086175  
C -1.906175 -0.100599 -1.111472 -0.167388  
C -0.865530 -1.199006 -1.174665 -0.305919  
C -0.831429 -1.611191 0.272332 -0.128357  
C -0.606731 1.300385 -0.204490 -0.116598  
C -1.558553 2.378131 0.276140 -0.450415  
C 0.120673 0.535836 0.726014 -0.189632  
C 1.534810 0.122389 0.614203 0.458681  
O 2.088619 -0.449440 1.549664 -0.496954  
H -0.229723 0.502825 1.753902 0.139570  
H -0.100640 1.544830 -1.137754 0.139398  
H -1.284826 -2.032083 -1.764435 0.170306  
H 0.092210 -0.930611 -1.619944 0.156107  
H -0.101409 -2.290635 0.696473 0.160580  
H -2.252261 0.422812 -1.999028 0.133459  
H -2.281815 2.664439 -0.495768 0.140783  
H -2.113434 2.047989 1.160327 0.153813  
H -1.000295 3.281446 0.557996 0.153952  
H -2.437438 -1.652341 1.785438 0.137048  
H -3.723794 0.009905 0.157345 0.135088  
C 2.343046 0.491232 -0.636712 -0.362125  
H 1.753135 0.320683 -1.546027 0.145089  
H 2.503972 1.579404 -0.602163 0.159670  
C 3.683688 -0.238140 -0.715777 -0.432114  
H 4.260617 0.103348 -1.582083 0.132444  
H 4.269701 -0.063780 0.189923 0.169538  
H 3.539455 -1.320189 -0.804564 0.147708

### TS8 s-cis-endo

B3LYP/6-31G(d) energy=-503.9417174000

Zero-point correction (ZPC)= 0.2429760000

HF/6-31G(d)// B3LYP/6-31G(d) energy=-500.606769

CPCM:HF/6-31G(d)// B3LYP/6-31G(d) ( $\epsilon=78.39$ ) energy=-500.617926

Number of Imaginary Frequencies= 1

C -0.599456 -1.442651 -1.046664 -0.140277  
C -1.977513 -0.843818 -1.056635 -0.296075  
C -2.133026 -0.498988 0.416363 -0.174693  
C -1.307464 -1.410106 1.111085 -0.063920  
C -0.359609 -1.945221 0.223802 -0.086463  
C -1.073838 1.225648 0.380092 -0.108690  
C 0.044114 0.956237 -0.432633 -0.192823

|   |           |           |           |           |
|---|-----------|-----------|-----------|-----------|
| C | 1.305310  | 0.551048  | 0.177551  | 0.464626  |
| O | 1.382939  | 0.262310  | 1.374936  | -0.520407 |
| C | -2.111496 | 2.239495  | -0.068954 | -0.457857 |
| H | -2.132046 | -0.023183 | -1.759129 | 0.151035  |
| H | -2.706248 | -1.633965 | -1.305749 | 0.167438  |
| H | -0.842969 | 1.258832  | 1.442172  | 0.172480  |
| H | 0.043190  | 1.243442  | -1.481695 | 0.115091  |
| H | -3.083502 | -0.163129 | 0.823286  | 0.135848  |
| H | -0.041476 | -1.693999 | -1.941959 | 0.137370  |
| H | -2.355329 | 2.138347  | -1.132570 | 0.146209  |
| H | -3.042700 | 2.160719  | 0.502577  | 0.145678  |
| H | -1.723694 | 3.255451  | 0.079834  | 0.162343  |
| H | 0.490078  | -2.552034 | 0.514950  | 0.144442  |
| H | -1.309639 | -1.562211 | 2.184652  | 0.145864  |
| C | 2.542902  | 0.509261  | -0.722750 | -0.351018 |
| H | 2.795813  | 1.549247  | -0.980948 | 0.153259  |
| H | 2.277487  | 0.029742  | -1.674831 | 0.140341  |
| C | 3.742216  | -0.179698 | -0.074098 | -0.431020 |
| H | 3.989591  | 0.293293  | 0.880124  | 0.164369  |
| H | 3.525036  | -1.232685 | 0.134744  | 0.145331  |
| H | 4.620067  | -0.133590 | -0.727907 | 0.131255  |

**TS8 s-cis-exo**

B3LYP/6-31G(d) energy= -503.9431683000  
 Zero-point correction (ZPC)= 0.2431300000  
 HF/6-31G(d)// B3LYP/6-31G(d) energy= -500.607996  
 CPCM:HF/6-31G(d)// B3LYP/6-31G(d) ( $\epsilon=78.39$ ) energy= -500.619013

Number of Imaginary Frequencies= 1

|   |           |           |           |           |
|---|-----------|-----------|-----------|-----------|
| C | 1.722627  | -1.486200 | -1.062951 | -0.098487 |
| C | 2.654596  | -0.674155 | -0.396986 | -0.084244 |
| C | 2.097526  | -0.249227 | 0.827511  | -0.172764 |
| C | 0.976299  | -1.216944 | 1.142166  | -0.320913 |
| C | 0.608782  | -1.657076 | -0.244736 | -0.132872 |
| C | 0.863979  | 1.301784  | 0.257800  | -0.106761 |
| C | 1.798461  | 2.286037  | -0.417294 | -0.454816 |
| C | -0.177125 | 0.699066  | -0.472256 | -0.185178 |
| C | -1.483546 | 0.416389  | 0.127999  | 0.449391  |
| O | -1.679612 | 0.427159  | 1.345490  | -0.509500 |
| H | -0.125990 | 0.693387  | -1.558171 | 0.116846  |
| H | 0.596174  | 1.555417  | 1.282991  | 0.168464  |
| H | 1.404237  | -2.079690 | 1.681266  | 0.167221  |
| H | 0.153218  | -0.818093 | 1.738068  | 0.206607  |
| H | -0.246646 | -2.283705 | -0.472591 | 0.141995  |
| H | 2.692239  | 0.215667  | 1.609713  | 0.137323  |
| H | 2.717586  | 2.442310  | 0.158664  | 0.142579  |
| H | 2.078132  | 1.948764  | -1.421036 | 0.148771  |
| H | 1.306596  | 3.262457  | -0.522099 | 0.155553  |
| H | 1.816230  | -1.843762 | -2.083320 | 0.131315  |
| H | 3.585245  | -0.313106 | -0.822195 | 0.134323  |
| C | -2.631803 | 0.125987  | -0.843012 | -0.350543 |
| H | -2.277386 | -0.576133 | -1.610317 | 0.144467  |
| H | -2.848531 | 1.059720  | -1.384374 | 0.156813  |
| C | -3.892800 | -0.394865 | -0.156573 | -0.431398 |
| H | -3.701210 | -1.348242 | 0.346903  | 0.148273  |
| H | -4.237014 | 0.308555  | 0.606493  | 0.164550  |
| H | -4.697953 | -0.545593 | -0.883928 | 0.132955  |

**TS9 s-trans-endo**

B3LYP/6-31G(d) energy= -484.4644933000  
 Zero-point correction (ZPC)= 0.268858  
 HF/6-31G(d)// B3LYP/6-31G(d) energy= -481.170826  
 CPCM:HF/6-31G(d)// B3LYP/6-31G(d) ( $\epsilon=78.39$ ) energy=-481.2417630000

Number of Imaginary Frequencies= 1

|   |           |           |           |           |
|---|-----------|-----------|-----------|-----------|
| C | 0.979836  | -1.632492 | 0.979401  | -0.090519 |
| C | 1.957371  | -0.541148 | 1.270632  | -0.325971 |
| C | 2.373896  | -0.113191 | -0.128808 | -0.182816 |
| C | 2.059169  | -1.205210 | -0.967796 | -0.063314 |
| C | 1.149929  | -2.070042 | -0.317456 | -0.103223 |
| C | 1.023216  | 1.240047  | -0.612229 | -0.143813 |
| C | 1.737784  | 2.524465  | -0.216959 | -0.466492 |
| C | -0.198590 | 0.932319  | 0.062976  | -0.152221 |
| C | -1.239097 | 0.251830  | -0.562130 | 0.115760  |
| N | -2.471929 | 0.068045  | -0.091738 | -0.339949 |
| C | -3.481505 | -0.671098 | -0.852328 | -0.338528 |
| C | -2.861201 | 0.576546  | 1.224852  | -0.342202 |
| H | 1.603113  | 0.242191  | 1.942926  | 0.185719  |
| H | 2.839439  | -0.995435 | 1.753927  | 0.227935  |
| H | 0.997254  | 1.088469  | -1.689933 | 0.179733  |
| H | -0.344994 | 1.327648  | 1.063544  | 0.158384  |
| H | 3.282958  | 0.458553  | -0.288738 | 0.192113  |
| H | 0.331312  | -2.084517 | 1.722030  | 0.190356  |
| H | -1.069219 | -0.152313 | -1.557780 | 0.178116  |
| H | -3.800669 | -1.559095 | -0.295671 | 0.199536  |
| H | -4.354707 | -0.036164 | -1.033906 | 0.206924  |
| H | -3.066933 | -0.983962 | -1.812089 | 0.190949  |
| H | -2.698788 | 1.657590  | 1.282232  | 0.203209  |
| H | -3.919441 | 0.371737  | 1.387626  | 0.205650  |
| H | -2.281213 | 0.084920  | 2.014896  | 0.187619  |
| H | 1.887415  | 2.591128  | 0.865711  | 0.172629  |
| H | 2.708395  | 2.622500  | -0.709720 | 0.181302  |
| H | 1.123994  | 3.380545  | -0.521340 | 0.196758  |
| H | 0.660389  | -2.924800 | -0.770164 | 0.183038  |
| H | 2.400351  | -1.317464 | -1.992326 | 0.193304  |

**TS9 s-trans-exo**

B3LYP/6-31G(d) energy= -484.4651148000  
 Zero-point correction (ZPC)= 0.268754  
 HF/6-31G(d)// B3LYP/6-31G(d) energy= -481.171478  
 CPCM:HF/6-31G(d)// B3LYP/6-31G(d) ( $\epsilon=78.39$ ) energy=-481.2427900000

Number of Imaginary Frequencies= 1

|   |           |           |           |           |
|---|-----------|-----------|-----------|-----------|
| C | -1.801036 | -1.511970 | 1.077530  | -0.100224 |
| C | -2.630739 | -0.458530 | 0.616620  | -0.046288 |
| C | -2.262582 | -0.090639 | -0.692303 | -0.197362 |
| C | -1.419906 | -1.238532 | -1.220201 | -0.330448 |
| C | -0.997302 | -1.923077 | 0.039842  | -0.093722 |
| C | -0.911510 | 1.359727  | -0.427148 | -0.144546 |
| C | -1.685214 | 2.465283  | 0.265213  | -0.463813 |
| C | 0.237966  | 0.818587  | 0.216806  | -0.134940 |
| C | 1.367781  | 0.434345  | -0.498616 | 0.102979  |
| N | 2.533592  | 0.030286  | 0.004691  | -0.339675 |
| C | 2.727415  | -0.097410 | 1.450138  | -0.342538 |
| C | 3.685403  | -0.248522 | -0.855828 | -0.338861 |
| H | 0.261489  | 0.805496  | 1.301824  | 0.159217  |
| H | -0.791114 | 1.524967  | -1.499296 | 0.183231  |
| H | -2.094378 | -1.916629 | -1.770182 | 0.228433  |
| H | -0.611869 | -0.981109 | -1.907697 | 0.174249  |
| H | -0.246344 | -2.704112 | 0.086498  | 0.188111  |
| H | -2.949938 | 0.447422  | -1.339282 | 0.192894  |
| H | -2.668086 | 2.627780  | -0.186861 | 0.177258  |
| H | -1.818516 | 2.261753  | 1.331916  | 0.171611  |
| H | -1.122752 | 3.402605  | 0.173772  | 0.194785  |
| H | 1.343355  | 0.497578  | -1.584685 | 0.180954  |
| H | 2.684268  | 0.882995  | 1.937695  | 0.204601  |
| H | 1.954509  | -0.744400 | 1.878660  | 0.188038  |
| H | 3.704276  | -0.542488 | 1.640560  | 0.204661  |

H 4.030163 -1.276453 -0.702381 0.200380  
H 3.405931 -0.119170 -1.902801 0.192103  
H 4.506385 0.437722 -0.622106 0.207614  
H -1.796603 -1.910757 2.085449 0.185885  
H -3.387583 0.039226 1.213768 0.195333

**TS9 s-trans-endo (full optimization in water)**

B3LYP/6-31G(d) energy= -484.4651148000

Zero-point correction (ZPC)= 0.268754

CPCM: B3LYP/6-31G(d) ( $\epsilon=78.39$ ) energy= -484.5346300000

Number of Imaginary Frequencies= 1

C 1.961287 -1.287694 -0.947840 -0.074858  
C 0.991450 -2.069377 -0.282336 -0.120526  
C 0.850202 -1.590138 1.004709 -0.101193  
C 1.910034 -0.574494 1.277207 -0.341604  
C 2.359457 -0.207737 -0.129120 -0.196743  
C 1.083796 1.217867 -0.629223 -0.147395  
C 1.856917 2.463112 -0.222941 -0.473260  
C -0.150828 0.968116 0.042380 -0.170426  
C -1.199446 0.295432 -0.579297 0.100811  
N -2.438349 0.145350 -0.113615 -0.339648  
C -3.427675 -0.657416 -0.831669 -0.349286  
C -2.824029 0.665153 1.197773 -0.353099  
H 1.616181 0.247593 1.936473 0.204109  
H 2.756858 -1.090769 1.770071 0.229234  
H 1.062559 1.061344 -1.710690 0.210755  
H -0.285494 1.369360 1.043506 0.173947  
H 3.316373 0.297075 -0.305878 0.222553  
H 0.158463 -1.967926 1.752669 0.200113  
H -1.029387 -0.131980 -1.568086 0.212404  
H -3.686224 -1.550813 -0.248414 0.199201  
H -4.337250 -0.067972 -0.995678 0.199884  
H -3.019280 -0.966327 -1.797274 0.203323  
H -2.544820 1.720682 1.285506 0.202332  
H -3.906696 0.575077 1.309718 0.203839  
H -2.332893 0.097504 2.000009 0.197669  
H 1.980552 2.525032 0.864077 0.172460  
H 2.845382 2.498160 -0.690218 0.172273  
H 1.298960 3.350873 -0.547927 0.178574  
H 0.426778 -2.885816 -0.723994 0.189750  
H 2.281389 -1.435484 -1.976427 0.194743

**TS9 s-trans-exo (full optimization in water)**

B3LYP/6-31G(d) energy= -484.4651148000

Zero-point correction (ZPC)= 0.268754

CPCM: B3LYP/6-31G(d) ( $\epsilon=78.39$ ) energy= -484.5356370000

Number of Imaginary Frequencies= 1

C -1.673851 -1.522572 1.106769 -0.117365  
C -2.574687 -0.532452 0.644411 -0.065720  
C -2.250721 -0.164631 -0.677805 -0.207380  
C -1.351661 -1.270040 -1.201500 -0.347586  
C -0.858177 -1.896975 0.061602 -0.104111  
C -0.970725 1.335976 -0.451188 -0.149146  
C -1.787632 2.422113 0.223488 -0.472218  
C 0.199319 0.857202 0.204607 -0.154319  
C 1.327105 0.463430 -0.509804 0.087868  
N 2.501782 0.098066 0.000504 -0.337689  
C 2.704108 0.017919 1.446888 -0.353556  
C 3.626786 -0.266223 -0.860059 -0.349146  
H 0.226506 0.869432 1.291000 0.169551  
H -0.858628 1.481830 -1.531560 0.219159  
H -2.002837 -2.003643 -1.715303 0.229835  
H -0.581166 -0.980256 -1.921511 0.199346  
H -0.050215 -2.621700 0.110104 0.197363

H -2.978669 0.336634 -1.329604 0.230295  
H -2.783830 2.518235 -0.220367 0.170545  
H -1.897979 2.237388 1.297226 0.170540  
H -1.272928 3.384363 0.100447 0.175256  
H 1.288389 0.479251 -1.599607 0.218653  
H 2.565157 1.001447 1.912202 0.202997  
H 1.992848 -0.689451 1.891890 0.195678  
H 3.720749 -0.327962 1.644177 0.204969  
H 3.924616 -1.304820 -0.669917 0.199714  
H 3.335315 -0.161679 -1.908203 0.203627  
H 4.482285 0.389325 -0.657030 0.200230  
H -1.617777 -1.894903 2.125829 0.187791  
H -3.343491 -0.062427 1.252245 0.194945

**10 s-trans**

B3LYP/6-31G(d) energy= -369.0031892000

Zero-point correction (ZPC)= 0.230447

Number of Imaginary Frequencies=0

C 3.540195 -0.564356 0.080611 -0.515343  
C 2.215359 0.045454 -0.213738 -0.046656  
C 1.027258 -0.554099 0.037898 -0.182396  
C -0.270986 0.042293 -0.207760 0.426217  
C -0.387225 1.499127 -0.587733 -0.380435  
C -0.443311 2.433351 0.642914 -0.457138  
N -1.358443 -0.688805 -0.046455 -0.384658  
C -1.308475 -2.141371 0.235898 -0.359267  
C -2.733094 -0.156813 -0.127665 -0.361861  
H 2.246185 1.034823 -0.665523 0.187024  
H 1.053467 -1.542801 0.482486 0.179584  
H 4.130507 -0.643285 -0.842520 0.214086  
H 4.114747 0.091784 0.748515 0.213014  
H 3.459656 -1.553869 0.537242 0.191545  
H -3.189649 -0.461866 -1.074825 0.224696  
H -3.309390 -0.583654 0.696642 0.220793  
H -2.752959 0.925159 -0.038080 0.214951  
H -0.571582 -2.631195 -0.400828 0.218412  
H -1.073023 -2.318468 1.289989 0.222389  
H -2.289467 -2.562967 0.018098 0.219616  
H -1.258174 1.655067 -1.228169 0.197637  
H 0.477128 1.764394 -1.199686 0.198600  
H -0.499300 3.471662 0.305271 0.203607  
H -1.317478 2.233504 1.270375 0.175372  
H 0.450107 2.321836 1.263650 0.180164

**10 s-cis1**

B3LYP/6-31G(d) energy= -368.9977020000

Zero-point correction (ZPC)= 0.230522

Number of Imaginary Frequencies=0

C 3.579815 -0.439237 -0.022068 -0.509163  
C 2.189778 0.069660 -0.199572 -0.049182  
C 1.077371 -0.626817 0.119694 -0.189404  
C -0.303187 -0.257848 -0.164921 0.396336  
C -1.204748 -1.407311 -0.561019 -0.374813  
C -2.085814 -1.892604 0.613721 -0.462099  
N -0.773602 0.964943 -0.040793 -0.361265  
C -0.014255 2.089299 0.543526 -0.359333  
C -2.145830 1.362084 -0.415971 -0.355468  
H 2.100165 1.047983 -0.668802 0.180115  
H 1.192922 -1.645218 0.486300 0.192817  
H 4.084408 -0.508690 -0.994899 0.211099  
H 4.167842 0.269842 0.575514 0.206362  
H 3.607790 -1.419109 0.461016 0.193053  
H -2.723086 1.559055 0.492374 0.223035  
H -2.085821 2.282092 -1.003059 0.221100

|   |           |           |           |          |
|---|-----------|-----------|-----------|----------|
| H | -2.641505 | 0.596687  | -1.004833 | 0.213168 |
| H | 0.783856  | 1.714590  | 1.181514  | 0.216966 |
| H | 0.401311  | 2.718717  | -0.248815 | 0.217855 |
| H | -0.707577 | 2.688075  | 1.137996  | 0.216122 |
| H | -0.567035 | -2.227303 | -0.899753 | 0.206020 |
| H | -1.828478 | -1.134865 | -1.417524 | 0.201919 |
| H | -2.782017 | -1.120280 | 0.953662  | 0.173448 |
| H | -2.670853 | -2.756572 | 0.287094  | 0.207371 |
| H | -1.475488 | -2.202967 | 1.467425  | 0.183962 |

**10 s-cis2**

B3LYP/6-31G(d) energy=-368.9987326000

Zero-point correction (ZPC)= 0.230566

Number of Imaginary Frequencies=0

|   |           |           |           |           |
|---|-----------|-----------|-----------|-----------|
| C | -3.485253 | 0.205378  | 0.165567  | -0.509514 |
| C | -2.038483 | -0.138304 | 0.268920  | -0.045946 |
| C | -1.074235 | 0.373642  | -0.526715 | -0.185382 |
| C | 0.363985  | 0.183722  | -0.378888 | 0.393979  |
| C | 1.210865  | 1.410575  | -0.618902 | -0.375313 |
| C | 1.299805  | 2.316514  | 0.632026  | -0.457957 |
| N | 0.919859  | -0.961575 | -0.049261 | -0.362203 |
| C | 0.205693  | -2.252958 | -0.004059 | -0.361857 |
| C | 2.364439  | -1.098860 | 0.240208  | -0.362943 |
| H | -1.768721 | -0.815033 | 1.078514  | 0.179507  |
| H | -1.353927 | 1.120948  | -1.266015 | 0.191764  |
| H | -4.081756 | -0.708309 | 0.041890  | 0.206960  |
| H | -3.831958 | 0.670111  | 1.098079  | 0.210437  |
| H | -3.695899 | 0.881517  | -0.666750 | 0.193882  |
| H | 2.480797  | -1.858384 | 1.015686  | 0.220110  |
| H | 2.892913  | -1.427134 | -0.660674 | 0.226430  |
| H | 2.785431  | -0.164900 | 0.603283  | 0.218231  |
| H | -0.013185 | -2.530974 | 1.031079  | 0.217044  |
| H | -0.716070 | -2.195541 | -0.579428 | 0.216555  |
| H | 0.862221  | -3.010424 | -0.438898 | 0.218760  |
| H | 0.733089  | 1.974804  | -1.426502 | 0.207638  |
| H | 2.208973  | 1.141654  | -0.972187 | 0.196138  |
| H | 1.879836  | 3.210028  | 0.387109  | 0.206047  |
| H | 0.306177  | 2.633049  | 0.961339  | 0.184262  |
| H | 1.792163  | 1.811357  | 1.469359  | 0.173438  |

**10 s-cis3**

B3LYP/6-31G(d) energy=-368.9969347000

Zero-point correction (ZPC)= 0.230289

Number of Imaginary Frequencies=0

|   |           |           |           |           |
|---|-----------|-----------|-----------|-----------|
| C | -3.418046 | -0.252515 | 0.152974  | -0.508861 |
| C | -1.948820 | -0.466211 | 0.287387  | -0.048424 |
| C | -1.008138 | 0.322804  | -0.276065 | -0.190080 |
| C | 0.427707  | 0.225297  | -0.057412 | 0.390988  |
| C | 1.214803  | 1.505273  | 0.153451  | -0.373514 |
| C | 0.493816  | 2.820285  | -0.166353 | -0.471126 |
| N | 1.072378  | -0.922952 | -0.026851 | -0.362096 |
| C | 0.492316  | -2.222040 | -0.423239 | -0.361256 |
| C | 2.506282  | -1.012108 | 0.324405  | -0.358474 |
| H | -1.330629 | 1.199654  | -0.829089 | 0.196825  |
| H | -3.898186 | -1.161949 | -0.232023 | 0.206046  |
| H | -3.865650 | -0.066806 | 1.138346  | 0.210617  |
| H | -3.659780 | 0.583275  | -0.508408 | 0.192943  |
| H | 2.694564  | -2.005970 | 0.732240  | 0.220632  |
| H | 3.120883  | -0.872082 | -0.571301 | 0.225890  |
| H | 2.773411  | -0.269853 | 1.074334  | 0.216271  |
| H | 0.261968  | -2.821714 | 0.462091  | 0.217104  |
| H | -0.407523 | -2.069305 | -1.015262 | 0.216272  |
| H | 1.238851  | -2.750222 | -1.021162 | 0.218227  |
| H | 2.145692  | 1.445318  | -0.423272 | 0.204074  |

|   |           |           |           |          |
|---|-----------|-----------|-----------|----------|
| H | 1.520034  | 1.519114  | 1.211166  | 0.215686 |
| H | 1.177010  | 3.649809  | 0.034192  | 0.198629 |
| H | 0.203081  | 2.883605  | -1.219671 | 0.181709 |
| H | -0.394130 | 2.965310  | 0.455020  | 0.183074 |
| H | -1.645769 | -1.292241 | 0.929860  | 0.179152 |

**TS10a s-trans-endo**

B3LYP/6-31G(d) energy= -563.0916423000

Zero-point correction (ZPC)= 0.326393

HF/6-31G(d)// B3LYP/6-31G(d) energy=-559.234649

CPCM:HF/6-31G(d)// B3LYP/6-31G(d) (ε=78.39) energy=-559.2995020000

Number of Imaginary Frequencies= 1

|   |           |           |           |           |
|---|-----------|-----------|-----------|-----------|
| C | 1.100718  | 1.129322  | 0.710316  | -0.148275 |
| C | 0.022314  | 0.208538  | 0.873842  | -0.195218 |
| C | 1.532532  | -1.839749 | -0.609147 | -0.098850 |
| C | 2.485109  | -1.204614 | 0.351093  | -0.325628 |
| C | 2.582274  | 0.211842  | -0.199023 | -0.177713 |
| C | 1.477766  | -1.088752 | -1.764668 | -0.097111 |
| C | 2.183528  | 0.117137  | -1.552528 | -0.073586 |
| C | -1.129260 | 0.134672  | 0.065713  | 0.414166  |
| C | -1.276499 | 1.039207  | -1.139702 | -0.373421 |
| C | -1.958914 | 2.385195  | -0.817339 | -0.453821 |
| C | 1.786521  | 1.612981  | 1.982336  | -0.463694 |
| N | -2.137965 | -0.698467 | 0.382699  | -0.405389 |
| C | -3.416879 | -0.764933 | -0.335240 | -0.348095 |
| C | -2.002982 | -1.660005 | 1.481557  | -0.343647 |
| H | 2.231310  | -1.309156 | 1.407105  | 0.182966  |
| H | 3.472004  | -1.679310 | 0.215434  | 0.224901  |
| H | 0.943719  | 1.935955  | -0.000624 | 0.178258  |
| H | 0.053313  | -0.398804 | 1.771050  | 0.153180  |
| H | 3.404918  | 0.862277  | 0.083405  | 0.188350  |
| H | 1.077496  | -2.813414 | -0.463395 | 0.186395  |
| H | -3.457035 | -1.658063 | -0.970497 | 0.197037  |
| H | -4.228299 | -0.821030 | 0.395463  | 0.203203  |
| H | -3.580360 | 0.117001  | -0.948433 | 0.199413  |
| H | -1.973597 | -1.153173 | 2.452515  | 0.202289  |
| H | -2.858893 | -2.334652 | 1.467529  | 0.201654  |
| H | -1.090258 | -2.252964 | 1.360012  | 0.180312  |
| H | 2.068987  | 0.783071  | 2.638210  | 0.170425  |
| H | 2.679786  | 2.205226  | 1.767059  | 0.178314  |
| H | 1.092223  | 2.252667  | 2.539829  | 0.193015  |
| H | 0.965533  | -1.365556 | -2.679104 | 0.180143  |
| H | 2.334025  | 0.890902  | -2.298975 | 0.188971  |
| H | -0.278566 | 1.233143  | -1.542614 | 0.170585  |
| H | -1.817286 | 0.521857  | -1.937061 | 0.179804  |
| H | -1.398533 | 2.941302  | -0.059721 | 0.171616  |
| H | -2.015562 | 2.999466  | -1.720749 | 0.187113  |
| H | -2.976540 | 2.247484  | -0.438598 | 0.172443  |

**TS10a s-trans-exo**

B3LYP/6-31G(d) energy= -563.0906441000

Zero-point correction (ZPC)= 0.32641

HF/6-31G(d)// B3LYP/6-31G(d) energy=-559.233596

CPCM:HF/6-31G(d)// B3LYP/6-31G(d) (ε=78.39) energy=-559.2981890000

Number of Imaginary Frequencies= 1

|   |           |           |           |           |
|---|-----------|-----------|-----------|-----------|
| C | -0.952534 | 1.281126  | 0.464577  | -0.146366 |
| C | 0.001489  | 0.243766  | 0.676265  | -0.186083 |
| C | -1.657187 | -1.600777 | -1.003704 | -0.095779 |
| C | -1.757092 | -0.267796 | -1.671522 | -0.334201 |
| C | -2.450967 | 0.568271  | -0.607430 | -0.196166 |
| C | -2.539145 | -1.650210 | 0.053324  | -0.100803 |
| C | -3.089553 | -0.360520 | 0.243380  | -0.050169 |

|   |           |           |           |           |
|---|-----------|-----------|-----------|-----------|
| C | 1.224401  | 0.082586  | -0.004571 | 0.400069  |
| C | 1.669693  | 1.074409  | -1.062873 | -0.373782 |
| C | 2.507293  | 2.237481  | -0.490042 | -0.452868 |
| C | -1.626111 | 1.889792  | 1.684068  | -0.460666 |
| N | 2.061800  | -0.917448 | 0.333724  | -0.401610 |
| C | 1.660134  | -1.944888 | 1.298941  | -0.345399 |
| C | 3.423972  | -1.084712 | -0.187098 | -0.348236 |
| H | -0.189951 | -0.401118 | 1.525724  | 0.153998  |
| H | -0.679672 | 2.032315  | -0.274434 | 0.179365  |
| H | -2.453647 | -0.361919 | -2.521945 | 0.224251  |
| H | -0.822411 | 0.122933  | -2.075709 | 0.181043  |
| H | -1.073072 | -2.431109 | -1.385259 | 0.185934  |
| H | -2.934214 | 1.507829  | -0.863062 | 0.189705  |
| H | -2.513429 | 2.471969  | 1.416982  | 0.173554  |
| H | -1.914361 | 1.125928  | 2.412506  | 0.169142  |
| H | -0.922400 | 2.570075  | 2.178850  | 0.188744  |
| H | 1.622592  | -1.542854 | 2.317962  | 0.201344  |
| H | 0.676773  | -2.347534 | 1.036588  | 0.182076  |
| H | 2.389150  | -2.755257 | 1.272533  | 0.200634  |
| H | 3.480311  | -1.981249 | -0.815248 | 0.198044  |
| H | 3.745315  | -0.224816 | -0.766947 | 0.199471  |
| H | 4.114665  | -1.205499 | 0.653354  | 0.203448  |
| H | -2.767344 | -2.523948 | 0.653168  | 0.183494  |
| H | -3.834598 | -0.109826 | 0.990992  | 0.192693  |
| H | 2.221253  | 0.560916  | -1.855747 | 0.181648  |
| H | 0.785391  | 1.493556  | -1.548248 | 0.172444  |
| H | 3.425437  | 1.887138  | -0.008647 | 0.171480  |
| H | 2.788480  | 2.923372  | -1.294519 | 0.188274  |
| H | 1.936758  | 2.800064  | 0.255137  | 0.171185  |

**TS10b s-trans-endo**

B3LYP/6-31G(d) energy=-563.0874099000  
Zero-point correction (ZPC)= 0.326276  
HF/6-31G(d)// B3LYP/6-31G(d) energy=-559.229718  
CPCM:HF/6-31G(d)// B3LYP/6-31G(d) ( $\epsilon=78.39$ ) energy=-559.2949180000  
Number of Imaginary Frequencies= 1

|   |           |           |           |           |
|---|-----------|-----------|-----------|-----------|
| C | -2.449880 | -0.344864 | 1.244164  | -0.330003 |
| C | -2.610257 | 0.164146  | -0.181758 | -0.179968 |
| C | -2.209966 | 1.518022  | -0.146303 | -0.063837 |
| C | -1.465748 | 1.773481  | 1.028941  | -0.098518 |
| C | -1.495132 | 0.647397  | 1.822431  | -0.097006 |
| C | -0.047773 | -0.936591 | -0.314111 | -0.197103 |
| C | 1.185351  | -0.262830 | -0.405380 | 0.406891  |
| N | 2.202548  | -0.612504 | 0.410189  | -0.399720 |
| C | 1.995746  | -1.529828 | 1.533209  | -0.343695 |
| C | -1.187086 | -0.776509 | -1.160252 | -0.153529 |
| C | -1.922657 | -2.053304 | -1.554873 | -0.461053 |
| C | 3.601885  | -0.214729 | 0.218142  | -0.347389 |
| H | -2.172011 | -1.392893 | 1.368444  | 0.184308  |
| H | -3.421324 | -0.217023 | 1.751893  | 0.226460  |
| H | -1.078771 | -0.096014 | -2.000276 | 0.179337  |
| H | -0.094237 | -1.784260 | 0.360155  | 0.151409  |
| H | -3.463108 | -0.134682 | -0.783754 | 0.189019  |
| H | -1.009135 | 0.537535  | 2.785834  | 0.188816  |
| H | 3.921587  | 0.465878  | 1.015355  | 0.198481  |
| H | 4.230292  | -1.110239 | 0.253795  | 0.202161  |
| H | 3.754498  | 0.267184  | -0.743613 | 0.197582  |
| H | 1.875985  | -2.565626 | 1.193075  | 0.199794  |
| H | 2.864463  | -1.479255 | 2.190899  | 0.201066  |
| H | 1.109869  | -1.235078 | 2.103404  | 0.178964  |
| H | -2.161842 | -2.675668 | -0.686472 | 0.170027  |
| H | -2.847533 | -1.844232 | -2.098926 | 0.178141  |
| H | -1.275692 | -2.642543 | -2.215301 | 0.193778  |

|   |           |          |           |           |
|---|-----------|----------|-----------|-----------|
| H | -0.958176 | 2.701724 | 1.263923  | 0.184105  |
| H | -2.385974 | 2.237471 | -0.939915 | 0.189825  |
| C | 1.434520  | 0.819804 | -1.439061 | -0.368443 |
| H | 2.246746  | 0.501388 | -2.104512 | 0.193021  |
| H | 0.558659  | 0.895868 | -2.083360 | 0.170710  |
| C | 1.743760  | 2.216098 | -0.864499 | -0.458105 |
| H | 2.656564  | 2.237610 | -0.264047 | 0.170886  |
| H | 1.870996  | 2.926921 | -1.686444 | 0.186671  |
| H | 0.923723  | 2.571710 | -0.235374 | 0.156931  |

**TS10b s-trans-exo**

B3LYP/6-31G(d) energy=-563.0881443000  
Zero-point correction (ZPC)= 0.326414  
HF/6-31G(d)// B3LYP/6-31G(d) energy=-559.230566  
CPCM:HF/6-31G(d)// B3LYP/6-31G(d) ( $\epsilon=78.39$ ) energy=-559.2955610000  
Number of Imaginary Frequencies= 1

|   |           |           |           |           |
|---|-----------|-----------|-----------|-----------|
| C | -3.014681 | -0.556304 | -0.341656 | -0.049790 |
| C | -2.490246 | 0.726145  | -0.079164 | -0.194997 |
| C | -1.650636 | 1.080991  | -1.293650 | -0.338095 |
| C | -1.391101 | -0.260809 | -1.899118 | -0.095492 |
| C | -2.285725 | -1.173673 | -1.387905 | -0.101925 |
| C | -1.122900 | 0.441793  | 1.334244  | -0.148994 |
| C | -1.926096 | -0.123393 | 2.494610  | -0.459535 |
| C | -0.060831 | -0.352413 | 0.814386  | -0.189174 |
| C | 1.233079  | 0.069990  | 0.451239  | 0.400783  |
| N | 2.149468  | -0.844741 | 0.068420  | -0.398325 |
| C | 3.594759  | -0.599470 | 0.000102  | -0.347583 |
| C | 1.663564  | 1.523642  | 0.532463  | -0.371452 |
| C | 2.107827  | 2.156622  | -0.801369 | -0.463652 |
| C | 1.773190  | -2.235314 | -0.199495 | -0.345267 |
| H | -0.231941 | -1.422170 | 0.853328  | 0.153522  |
| H | -0.919236 | 1.504763  | 1.450011  | 0.181543  |
| H | -2.293764 | 1.650506  | -1.986159 | 0.224706  |
| H | -0.766826 | 1.693451  | -1.113364 | 0.181977  |
| H | -0.686800 | -0.440925 | -2.703940 | 0.186689  |
| H | -3.087736 | 1.479146  | 0.427855  | 0.190281  |
| H | -2.863152 | 0.419764  | 2.650318  | 0.174003  |
| H | -2.155017 | -1.183735 | 2.351887  | 0.169127  |
| H | -1.335919 | -0.032261 | 3.414580  | 0.190478  |
| H | 1.604615  | -2.795218 | 0.728613  | 0.199221  |
| H | 0.866232  | -2.269609 | -0.809365 | 0.182255  |
| H | 2.583344  | -2.714585 | -0.751095 | 0.200057  |
| H | 3.944042  | -0.642736 | -1.037608 | 0.198613  |
| H | 3.859671  | 0.364458  | 0.425945  | 0.197436  |
| H | 4.110296  | -1.377464 | 0.572262  | 0.202531  |
| H | -2.409128 | -2.199222 | -1.717015 | 0.183431  |
| H | -3.809143 | -1.032278 | 0.223351  | 0.192943  |
| H | 0.839431  | 2.109776  | 0.940464  | 0.173066  |
| H | 2.467486  | 1.617710  | 1.273453  | 0.195018  |
| H | 1.316504  | 2.103961  | -1.555655 | 0.164157  |
| H | 2.344156  | 3.212593  | -0.640151 | 0.189934  |
| H | 2.995400  | 1.680410  | -1.224794 | 0.172457  |

**I1 s-trans**

B3LYP/6-31G(d) energy=-310.2186323000  
Zero-point correction (ZPC)= 0.159901  
Number of Imaginary Frequencies=0

|   |           |           |           |           |
|---|-----------|-----------|-----------|-----------|
| C | -3.269026 | -0.291343 | 0.000022  | -0.520819 |
| C | -1.796231 | -0.433679 | -0.000029 | -0.024776 |
| C | -0.918407 | 0.608100  | -0.000188 | -0.160321 |
| C | 0.492895  | 0.437110  | -0.000025 | 0.443936  |
| O | 1.164487  | 1.550019  | 0.000112  | -0.488751 |
| C | 1.228380  | -0.874590 | -0.000064 | -0.372802 |

|   |           |           |           |           |
|---|-----------|-----------|-----------|-----------|
| C | 2.758214  | -0.766758 | 0.000022  | -0.536813 |
| H | -1.274368 | 1.635078  | -0.000405 | 0.219214  |
| H | -1.413546 | -1.454291 | 0.000155  | 0.202502  |
| H | -3.690375 | -0.810541 | -0.873177 | 0.229394  |
| H | -3.689619 | -0.807262 | 0.875603  | 0.229439  |
| H | -3.597989 | 0.749721  | -0.001591 | 0.211609  |
| H | 0.885480  | -1.443086 | -0.874778 | 0.236106  |
| H | 0.885357  | -1.443122 | 0.874575  | 0.236105  |
| H | 3.187905  | -1.771439 | -0.000086 | 0.229911  |
| H | 3.141546  | -0.265556 | -0.897168 | 0.195372  |
| H | 3.141543  | -0.265868 | 0.897402  | 0.195379  |
| H | 2.133216  | 1.403165  | 0.000144  | 0.475459  |

**11 s-cis**

B3LYP/6-31G(d) energy=-310.2205131000

Zero-point correction (ZPC)=0.159591

Number of Imaginary Frequencies=0

|   |           |           |           |           |
|---|-----------|-----------|-----------|-----------|
| C | -3.348365 | -0.240076 | 0.000253  | -0.523609 |
| C | -1.963596 | 0.276504  | -0.000024 | -0.006111 |
| C | -0.841009 | -0.499979 | -0.000173 | -0.173525 |
| C | 0.471367  | 0.043162  | -0.000189 | 0.442358  |
| O | 0.600909  | 1.338655  | -0.000236 | -0.508592 |
| C | 1.683378  | -0.834970 | -0.000309 | -0.370424 |
| C | 3.034416  | -0.114924 | 0.000503  | -0.535108 |
| H | -0.917085 | -1.583490 | -0.000155 | 0.205055  |
| H | -1.843175 | 1.359589  | 0.000103  | 0.224366  |
| H | -3.887336 | 0.155051  | 0.874029  | 0.231241  |
| H | -3.887900 | 0.155583  | -0.872921 | 0.231252  |
| H | -3.403404 | -1.330607 | -0.000035 | 0.206654  |
| H | 1.589048  | -1.502500 | 0.869442  | 0.242207  |
| H | 1.589531  | -1.501353 | -0.871015 | 0.242243  |
| H | 3.838552  | -0.854709 | 0.000372  | 0.230448  |
| H | 3.178735  | 0.500864  | -0.895921 | 0.192671  |
| H | 3.178037  | 0.499988  | 0.897621  | 0.192703  |
| H | 1.540578  | 1.614034  | 0.000009  | 0.476235  |

**Complex 11 s-trans-endo**

B3LYP/6-31G(d) energy=-504.3310393

Zero-point correction (ZPC)=0.25433

Number of Imaginary Frequencies=0

|   |           |           |           |
|---|-----------|-----------|-----------|
| C | -0.791243 | -2.073773 | -0.780216 |
| C | -0.977972 | -1.818622 | 0.646220  |
| C | 0.231234  | -1.808717 | 1.262730  |
| C | 1.300378  | -2.127068 | 0.254088  |
| C | 0.534539  | -2.225399 | -1.036496 |
| C | 0.676138  | 0.813204  | -1.664629 |
| C | 0.965181  | 1.183918  | -0.381083 |
| C | -0.015280 | 1.489488  | 0.591536  |
| O | 0.464735  | 1.823960  | 1.763641  |
| C | 1.698183  | 0.638393  | -2.730000 |
| C | -1.495340 | 1.592171  | 0.346445  |
| C | -2.364622 | 1.639761  | 1.609352  |
| H | 2.125003  | -1.401950 | 0.233704  |
| H | 1.770163  | -3.095009 | 0.492292  |
| H | -0.361958 | 0.726458  | -1.975393 |
| H | 1.998506  | 1.274687  | -0.055886 |
| H | 0.982477  | -2.484319 | -1.988796 |
| H | 0.418892  | -1.683964 | 2.323104  |
| H | 2.716531  | 0.596126  | -2.336212 |
| H | 1.496036  | -0.252555 | -3.332934 |
| H | 1.631604  | 1.493119  | -3.421233 |
| H | -1.943835 | -1.700046 | 1.126743  |
| H | -1.597380 | -2.166261 | -1.500857 |
| H | -1.797209 | 0.760126  | -0.295664 |

|   |           |          |           |
|---|-----------|----------|-----------|
| H | -1.650027 | 2.505659 | -0.247716 |
| H | -2.196535 | 2.546158 | 2.205893  |
| H | -3.418745 | 1.663133 | 1.322043  |
| H | -2.215344 | 0.756970 | 2.240168  |
| H | -0.244143 | 2.045770 | 2.398533  |

**Complex 11 s-trans-exo**

B3LYP/6-31G(d) energy=-504.3285712

Zero-point correction (ZPC)=0.253773

Number of Imaginary Frequencies=0

|   |           |           |           |
|---|-----------|-----------|-----------|
| C | -0.448742 | 2.426737  | -0.876103 |
| C | -0.766966 | 2.350924  | 0.594242  |
| C | 0.512195  | 1.829595  | 1.193958  |
| C | 1.437114  | 1.688111  | 0.213114  |
| C | 0.840915  | 2.059940  | -1.070846 |
| C | -0.640818 | -0.883724 | -1.744074 |
| C | 0.367956  | -1.357052 | -0.957604 |
| C | 0.246611  | -1.592568 | 0.433621  |
| C | -1.023479 | -1.535423 | 1.235179  |
| C | -0.837098 | -1.458320 | 2.756209  |
| C | -0.544224 | -0.713435 | -3.215266 |
| O | 1.345405  | -2.008496 | 1.008070  |
| H | 1.344093  | -1.567055 | -1.387141 |
| H | -1.606193 | -0.652778 | -1.297831 |
| H | -1.004829 | 3.349472  | 0.993481  |
| H | -1.651090 | 1.735462  | 0.821159  |
| H | 0.671678  | 1.693945  | 2.257986  |
| H | -1.142621 | 2.789127  | -1.626134 |
| H | -0.869323 | 0.292003  | -3.507272 |
| H | 0.462020  | -0.899097 | -3.597464 |
| H | -1.242254 | -1.409553 | -3.704427 |
| H | 2.470623  | 1.385172  | 0.344861  |
| H | 1.373867  | 2.063692  | -2.015744 |
| H | -1.590426 | -2.442697 | 0.973975  |
| H | -1.626261 | -0.695885 | 0.880432  |
| H | -1.815968 | -1.379013 | 3.235525  |
| H | -0.371926 | -2.360788 | 3.174657  |
| H | -0.252806 | -0.579732 | 3.047587  |
| H | 1.222080  | -2.171964 | 1.963804  |

**Complex 11 s-cis-endo**

B3LYP/6-31G(d) energy=-504.3326942

Zero-point correction (ZPC)=0.254204

Number of Imaginary Frequencies=0

|   |           |           |           |
|---|-----------|-----------|-----------|
| C | -0.725284 | -2.069776 | -0.798139 |
| C | -0.841832 | -1.836981 | 0.636364  |
| C | 0.398818  | -1.765846 | 1.183773  |
| C | 1.424470  | -2.020084 | 0.113248  |
| C | 0.590404  | -2.147037 | -1.132593 |
| C | 0.546470  | 0.790347  | -1.795300 |
| C | 0.689581  | 1.211631  | -0.498454 |
| C | -0.403010 | 1.402376  | 0.372715  |
| O | -1.611448 | 1.221226  | -0.107623 |
| C | 1.658747  | 0.722494  | -2.778303 |
| C | -0.228851 | 1.923252  | 1.769846  |
| C | -1.411542 | 1.694006  | 2.718249  |
| H | 2.207451  | -1.252322 | 0.052349  |
| H | 1.955883  | -2.964175 | 0.314154  |
| H | -0.456498 | 0.599518  | -2.167725 |
| H | 1.675107  | 1.423744  | -0.094559 |
| H | 0.994205  | -2.378413 | -2.111266 |
| H | 0.638179  | -1.646789 | 2.234588  |
| H | 2.644753  | 0.785295  | -2.311065 |
| H | 1.596367  | -0.180813 | -3.393323 |



|   |           |           |           |
|---|-----------|-----------|-----------|
| H | 1.555122  | 1.568810  | -3.475734 |
| H | -1.783971 | -1.769793 | 1.170682  |
| H | -1.566190 | -2.190766 | -1.472628 |
| H | -0.031870 | 3.003452  | 1.670872  |
| H | 0.691754  | 1.494973  | 2.178300  |
| H | -2.316868 | 2.232942  | 2.407852  |
| H | -1.644145 | 0.629264  | 2.825274  |
| H | -1.160670 | 2.078421  | 3.709920  |
| H | -2.293461 | 1.368238  | 0.575288  |

**Complex 11 s-cis-exo**

B3LYP/6-31G(d) energy= -504.3314165

Zero-point correction (ZPC)= 0.253872

Number of Imaginary Frequencies=0

|   |           |           |           |
|---|-----------|-----------|-----------|
| C | -0.742645 | 2.082961  | -1.439917 |
| C | -0.867671 | 2.475928  | -0.144814 |
| C | 0.467314  | 2.351515  | 0.539258  |
| C | 1.338503  | 1.746273  | -0.526151 |
| C | 0.621352  | 1.629982  | -1.675243 |
| C | -1.778338 | -0.434162 | 0.469451  |
| C | -3.125021 | -0.368942 | -0.151917 |
| C | -0.685572 | -1.022362 | -0.112717 |
| C | 0.552265  | -1.193436 | 0.537922  |
| O | 0.641708  | -0.833097 | 1.804704  |
| C | 1.708394  | -1.902160 | -0.092144 |
| C | 1.732213  | -3.400837 | 0.308466  |
| H | 1.640205  | -1.805454 | -1.178338 |
| H | -0.741205 | -1.375490 | -1.137611 |
| H | -1.689021 | -0.074633 | 1.492863  |
| H | 0.846446  | 3.345797  | 0.825000  |
| H | 0.433219  | 1.773829  | 1.473030  |
| H | 2.397129  | 1.544500  | -0.404821 |
| H | -1.747812 | 2.905732  | 0.319781  |
| H | -3.574185 | 0.621230  | -0.022056 |
| H | -3.116514 | -0.634075 | -1.211760 |
| H | -3.787856 | -1.071686 | 0.377296  |
| H | 0.997217  | 1.283582  | -2.632269 |
| H | -1.519984 | 2.110972  | -2.195890 |
| H | 2.643499  | -1.419918 | 0.220942  |
| H | 2.598079  | -3.877807 | -0.157922 |
| H | 1.814903  | -3.531557 | 1.392153  |
| H | 0.830031  | -3.915485 | -0.033357 |
| H | 1.528652  | -1.008975 | 2.170183  |

**TS11 s-trans-endo**

B3LYP/6-31G(d) energy= -504.3239278000

Zero-point correction (ZPC)= 0.25588600

HF/6-31G(d)// B3LYP/6-31G(d) energy= -500.997797

CPCM:HF/6-31G(d)// B3LYP/6-31G(d) ( $\epsilon=78.39$ ) energy= -501.074224

Number of Imaginary Frequencies=1

|   |           |           |           |           |
|---|-----------|-----------|-----------|-----------|
| C | 1.262131  | -1.349424 | -1.148509 | -0.070593 |
| C | 0.516142  | -2.097974 | -0.195981 | -0.109806 |
| C | 0.917039  | -1.726496 | 1.063967  | -0.086312 |
| C | 2.081821  | -0.795754 | 0.969097  | -0.335923 |
| C | 2.066897  | -0.403932 | -0.497096 | -0.184072 |
| C | 0.861252  | 1.296802  | -0.522368 | -0.135705 |
| C | -0.071967 | 1.152337  | 0.538251  | -0.163512 |
| C | -1.367952 | 0.688092  | 0.407485  | 0.409725  |
| O | -2.103396 | 0.701268  | 1.516759  | -0.554755 |
| C | 1.923988  | 2.368742  | -0.399908 | -0.471528 |
| C | -2.017214 | 0.265230  | -0.887276 | -0.361169 |
| C | -3.264156 | -0.617825 | -0.739287 | -0.510400 |
| H | 2.089935  | 0.014342  | 1.701244  | 0.196890  |

|   |           |           |           |          |
|---|-----------|-----------|-----------|----------|
| H | 3.001457  | -1.379343 | 1.147870  | 0.235294 |
| H | 0.476989  | 1.178356  | -1.531583 | 0.188330 |
| H | 0.212196  | 1.485624  | 1.533240  | 0.181479 |
| H | 2.930423  | 0.038222  | -0.981710 | 0.197952 |
| H | 0.519008  | -2.106484 | 1.998581  | 0.202394 |
| H | 2.419193  | 2.350959  | 0.575740  | 0.183314 |
| H | 2.679607  | 2.297309  | -1.185729 | 0.186296 |
| H | 1.435097  | 3.346492  | -0.502732 | 0.207542 |
| H | -0.241060 | -2.836641 | -0.432831 | 0.186499 |
| H | 1.189527  | -1.467020 | -2.225582 | 0.196138 |
| H | -1.267249 | -0.248853 | -1.498192 | 0.180923 |
| H | -2.275552 | 1.178793  | -1.442237 | 0.218940 |
| H | -4.105993 | -0.086557 | -0.276330 | 0.176072 |
| H | -3.613255 | -0.925933 | -1.728178 | 0.206817 |
| H | -3.059068 | -1.525586 | -0.161469 | 0.180090 |
| H | -3.011972 | 0.397392  | 1.345568  | 0.449012 |

**TS11 s-trans-exo**

B3LYP/6-31G(d) energy= -504.3225669000

Zero-point correction (ZPC)= 0.25563000

HF/6-31G(d)// B3LYP/6-31G(d) energy= -500.997563

CPCM:HF/6-31G(d)// B3LYP/6-31G(d) ( $\epsilon=78.39$ ) energy= -501.074623

Number of Imaginary Frequencies=1

|   |           |           |           |           |
|---|-----------|-----------|-----------|-----------|
| C | -1.876178 | -0.282064 | -0.941895 | -0.199619 |
| C | -0.901958 | -1.437740 | -1.012365 | -0.348259 |
| C | -0.925592 | -1.972023 | 0.384699  | -0.092448 |
| C | -1.968057 | -1.414531 | 1.075730  | -0.097194 |
| C | -2.592956 | -0.436154 | 0.245747  | -0.048018 |
| C | -0.626723 | 1.383843  | -0.436347 | -0.130562 |
| C | 0.216915  | 0.977970  | 0.626176  | -0.151601 |
| C | 1.520025  | 0.531599  | 0.514545  | 0.410209  |
| C | 2.342087  | 0.413293  | -0.741785 | -0.380788 |
| C | 3.176279  | -0.878029 | -0.843622 | -0.477215 |
| C | -1.624955 | 2.492764  | -0.211980 | -0.470886 |
| O | 2.132331  | 0.272574  | 1.671314  | -0.551552 |
| H | -0.150048 | 1.085631  | 1.643888  | 0.182588  |
| H | -0.202393 | 1.365132  | -1.438109 | 0.192391  |
| H | -1.328206 | -2.196993 | -1.689732 | 0.234636  |
| H | 0.094469  | -1.215315 | -1.402387 | 0.181606  |
| H | -0.253028 | -2.737574 | 0.755568  | 0.195135  |
| H | -2.298032 | 0.178130  | -1.829415 | 0.196832  |
| H | -2.411901 | 2.506427  | -0.970868 | 0.184749  |
| H | -2.081376 | 2.442745  | 0.780204  | 0.184353  |
| H | -1.090578 | 3.450128  | -0.282262 | 0.205661  |
| H | -2.271881 | -1.661890 | 2.086040  | 0.193320  |
| H | -3.472790 | 0.135383  | 0.522705  | 0.198518  |
| H | 3.015324  | 1.283759  | -0.767412 | 0.217147  |
| H | 1.698455  | 0.512296  | -1.618623 | 0.179811  |
| H | 3.711148  | -0.890897 | -1.796740 | 0.205596  |
| H | 3.938929  | -0.957665 | -0.059593 | 0.164937  |
| H | 2.548011  | -1.773004 | -0.793299 | 0.176033  |
| H | 3.061927  | 0.019551  | 1.536105  | 0.444675  |

**TS11 s-cis-endo**

B3LYP/6-31G(d) energy= -504.3293613000

Zero-point correction (ZPC)= 0.25556300

HF/6-31G(d)// B3LYP/6-31G(d) energy= -501.006776

CPCM:HF/6-31G(d)// B3LYP/6-31G(d) ( $\epsilon=78.39$ ) energy= -501.081351

Number of Imaginary Frequencies=1

|   |           |           |           |           |
|---|-----------|-----------|-----------|-----------|
| C | -1.303204 | -1.265520 | 1.193272  | -0.052992 |
| C | -0.336523 | -2.043874 | 0.483160  | -0.105568 |
| C | -0.564847 | -1.912741 | -0.859095 | -0.105729 |

|   |           |           |           |           |
|---|-----------|-----------|-----------|-----------|
| C | -1.803223 | -1.103582 | -1.086482 | -0.337429 |
| C | -2.103167 | -0.563899 | 0.295964  | -0.187177 |
| C | -1.098323 | 1.393046  | 0.286877  | -0.106787 |
| C | 0.089539  | 1.197420  | -0.452744 | -0.175866 |
| C | 1.284706  | 0.809647  | 0.120770  | 0.427012  |
| O | 1.288477  | 0.556365  | 1.432238  | -0.574405 |
| C | -2.207252 | 2.235524  | -0.284865 | -0.482498 |
| C | 2.585573  | 0.732206  | -0.627118 | -0.373497 |
| C | 3.411846  | -0.538080 | -0.353387 | -0.473290 |
| H | -1.724542 | -0.366868 | -1.891096 | 0.189918  |
| H | -2.621566 | -1.782897 | -1.378987 | 0.232105  |
| H | -0.996030 | 1.423552  | 1.366961  | 0.213843  |
| H | 0.092834  | 1.392294  | -1.520353 | 0.172894  |
| H | -3.064475 | -0.143339 | 0.566855  | 0.195911  |
| H | 0.005859  | -2.379258 | -1.654662 | 0.192254  |
| H | -2.396541 | 2.019944  | -1.340789 | 0.183351  |
| H | -3.139858 | 2.140022  | 0.275644  | 0.191291  |
| H | -1.896537 | 3.287923  | -0.215441 | 0.212350  |
| H | 0.444200  | -2.636593 | 0.945421  | 0.178570  |
| H | -1.383232 | -1.215832 | 2.274205  | 0.194105  |
| H | 3.176854  | 1.618107  | -0.348138 | 0.212599  |
| H | 2.378672  | 0.826594  | -1.696453 | 0.195584  |
| H | 3.731024  | -0.624557 | 0.693246  | 0.155667  |
| H | 2.852062  | -1.440498 | -0.616868 | 0.174037  |
| H | 4.325077  | -0.514715 | -0.953416 | 0.207193  |
| H | 2.177636  | 0.304318  | 1.737859  | 0.446572  |

### TS11 *s-cis-exo*

B3LYP/6-31G(d) energy= -504.3282576000

Zero-point correction (ZPC)= 0.25533500

HF/6-31G(d)// B3LYP/6-31G(d) energy= -501.005641

CPCM:HF/6-31G(d)// B3LYP/6-31G(d) ( $\epsilon=78.39$ ) energy= -501.079322

Number of Imaginary Frequencies=1

|   |           |           |           |           |
|---|-----------|-----------|-----------|-----------|
| C | 1.021945  | -1.305980 | 1.211858  | -0.356913 |
| C | 0.666065  | -2.066334 | -0.025253 | -0.107240 |
| C | 1.533353  | -1.746603 | -1.033914 | -0.100507 |
| C | 2.425828  | -0.730500 | -0.566733 | -0.056179 |
| C | 2.066509  | -0.333261 | 0.715544  | -0.194225 |
| C | 0.871822  | 1.473470  | 0.200746  | -0.106017 |
| C | 1.891161  | 2.370738  | -0.442957 | -0.479558 |
| C | -0.256614 | 1.030798  | -0.524893 | -0.160378 |
| C | -1.471195 | 0.703069  | 0.043683  | 0.413805  |
| O | -1.581287 | 0.728857  | 1.377335  | -0.574729 |
| C | -2.702686 | 0.389462  | -0.757463 | -0.375808 |
| C | -3.414153 | -0.913932 | -0.343164 | -0.467730 |
| H | -0.204814 | 1.000683  | -1.608473 | 0.173468  |
| H | 0.727947  | 1.618735  | 1.268901  | 0.215939  |
| H | 1.501041  | -1.991465 | 1.931292  | 0.231405  |
| H | 0.169547  | -0.868444 | 1.740161  | 0.205797  |
| H | -0.123553 | -2.808123 | -0.074579 | 0.188390  |
| H | 2.717445  | 0.223607  | 1.380437  | 0.196605  |
| H | 2.848309  | 2.364160  | 0.085173  | 0.189136  |
| H | 2.056267  | 2.126714  | -1.495825 | 0.183741  |
| H | 1.508270  | 3.400484  | -0.396393 | 0.209608  |
| H | 1.553846  | -2.184537 | -2.025055 | 0.186956  |
| H | 3.242625  | -0.313562 | -1.146595 | 0.193109  |
| H | -2.433525 | 0.352085  | -1.816078 | 0.197307  |
| H | -3.396645 | 1.236391  | -0.642529 | 0.209347  |
| H | -2.755757 | -1.779528 | -0.464566 | 0.173754  |
| H | -3.768156 | -0.896496 | 0.694987  | 0.155831  |
| H | -4.294260 | -1.063694 | -0.973592 | 0.206687  |
| H | -2.490501 | 0.526582  | 1.659338  | 0.448327  |

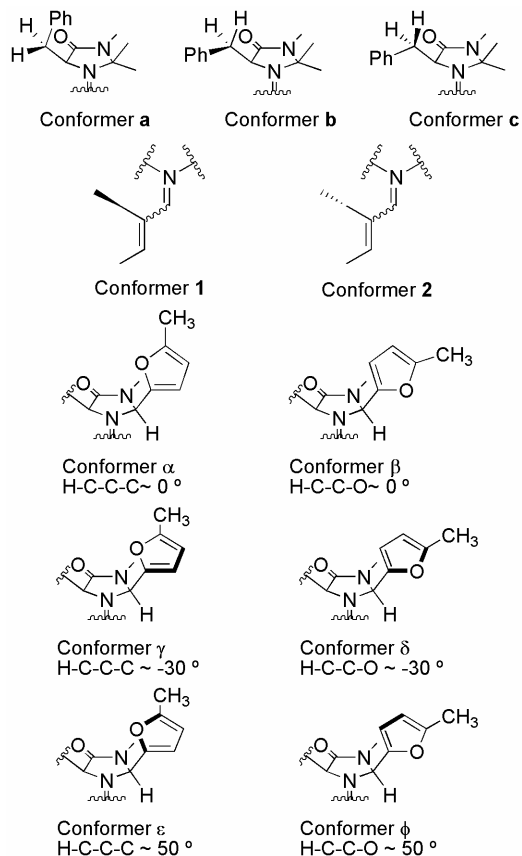

Figure 1. Nomenclature for iminium complexes.

### 13(E)-a1

B3LYP/6-31G(d) energy= -924.7976362000

Zero-point correction (ZPC)= 0.4307520000

Number of Imaginary Frequencies=0

|   |           |           |           |           |
|---|-----------|-----------|-----------|-----------|
| N | -0.577680 | -0.891213 | -0.027277 | -0.485650 |
| C | -0.011190 | -0.721944 | -1.398061 | -0.078095 |
| C | 1.296457  | -1.494813 | -1.347794 | 0.632526  |
| N | 1.470829  | -1.972180 | -0.087234 | -0.462627 |
| C | 0.402921  | -1.666953 | 0.870974  | 0.337782  |
| C | 0.246513  | 0.744323  | -1.847480 | -0.383735 |
| C | 1.064307  | 1.586460  | -0.890687 | 0.150280  |
| C | 2.461510  | 1.465740  | -0.831264 | -0.194528 |
| C | 3.202033  | 2.241938  | 0.062050  | -0.133646 |
| C | 2.560485  | 3.154736  | 0.902680  | -0.127065 |
| C | 1.173171  | 3.296599  | 0.838540  | -0.132749 |
| C | 0.433064  | 2.517197  | -0.053369 | -0.198427 |
| O | 2.049791  | -1.618840 | -2.295291 | -0.499625 |
| C | 2.670232  | -2.723716 | 0.268834  | -0.348713 |
| C | 0.955545  | -0.804012 | 2.014338  | -0.471545 |
| C | -0.230781 | -2.990087 | 1.340741  | -0.465194 |
| C | -1.793941 | -0.489796 | 0.298124  | 0.433239  |
| C | -2.697822 | -0.052947 | -0.754033 | -0.175113 |
| C | -3.965444 | 0.379174  | -0.555925 | -0.055630 |
| C | -4.900856 | 0.755113  | -1.651448 | -0.513716 |
| C | -2.281160 | -0.442239 | 1.729607  | -0.371849 |
| C | -2.216289 | 0.990496  | 2.314613  | -0.468709 |
| H | -0.662405 | -1.218480 | -2.124320 | 0.213882  |
| H | 3.246426  | -2.209660 | 1.043637  | 0.185878  |
| H | 3.272693  | -2.789613 | -0.638120 | 0.230052  |
| H | 2.424821  | -3.735023 | 0.605738  | 0.184956  |
| H | 1.742568  | -1.364314 | 2.527053  | 0.187811  |
| H | 1.387241  | 0.119940  | 1.623328  | 0.208906  |

|    |           |           |           |          |
|----|-----------|-----------|-----------|----------|
| H  | 0.200184  | -0.561791 | 2.762320  | 0.173720 |
| H  | 0.537981  | -3.590008 | 1.835114  | 0.195074 |
| H  | -0.607135 | -3.556929 | 0.484357  | 0.184083 |
| H  | -1.038784 | -2.857729 | 2.060495  | 0.181620 |
| H  | -5.233287 | 1.794224  | -1.522893 | 0.209847 |
| H  | -5.809452 | 0.140186  | -1.597894 | 0.211058 |
| H  | -4.456314 | 0.645237  | -2.643753 | 0.190742 |
| H  | -4.363904 | 0.471444  | 0.451962  | 0.184030 |
| H  | -2.356640 | -0.124048 | -1.778710 | 0.179561 |
| H  | -3.310179 | -0.809555 | 1.759181  | 0.195673 |
| H  | -1.705796 | -1.103729 | 2.368083  | 0.185465 |
| H  | 0.763771  | 0.636776  | -2.807601 | 0.218665 |
| H  | -0.706480 | 1.239709  | -2.052293 | 0.167114 |
| H  | -0.644387 | 2.654484  | -0.119254 | 0.124346 |
| H  | 0.669832  | 4.024789  | 1.468522  | 0.151412 |
| H  | 3.140106  | 3.765462  | 1.588679  | 0.159355 |
| H  | 4.283665  | 2.145122  | 0.088743  | 0.159615 |
| H  | 2.970659  | 0.773879  | -1.496695 | 0.171051 |
| H  | -2.856036 | 1.686664  | 1.766562  | 0.172933 |
| H  | -2.555515 | 0.961621  | 3.354163  | 0.196277 |
| H  | -1.196580 | 1.384148  | 2.294831  | 0.189665 |
| XX | 1.824160  | 2.358173  | -0.003511 | 0.000000 |

### 13(E)-a2

B3LYP/6-31G(d) energy=-924.7978469000

Zero-point correction (ZPC)=0.4308070000

Number of Imaginary Frequencies=0

|   |           |           |           |           |
|---|-----------|-----------|-----------|-----------|
| N | -0.657506 | 0.683946  | 0.166586  | -0.481100 |
| C | 0.005349  | 0.332429  | 1.457798  | -0.083096 |
| C | 1.157744  | 1.319050  | 1.551409  | 0.635324  |
| N | 1.166646  | 2.084401  | 0.427329  | -0.464672 |
| C | 0.166313  | 1.742493  | -0.590674 | 0.337450  |
| C | 0.511843  | -1.129569 | 1.598385  | -0.379277 |
| C | 1.417690  | -1.621276 | 0.490170  | 0.149372  |
| C | 2.786144  | -1.309353 | 0.486314  | -0.194015 |
| C | 3.612181  | -1.761978 | -0.543797 | -0.132948 |
| C | 3.085264  | -2.536775 | -1.580032 | -0.127304 |
| C | 1.728196  | -2.864151 | -1.578339 | -0.128500 |
| C | 0.902479  | -2.408979 | -0.548756 | -0.194961 |
| O | 1.927940  | 1.377392  | 2.491360  | -0.498070 |
| C | 2.198491  | 3.096058  | 0.221301  | -0.349034 |
| C | 0.855872  | 1.146434  | -1.829469 | -0.469993 |
| C | -0.673619 | 2.989775  | -0.906683 | -0.468744 |
| C | -1.809469 | 0.158939  | -0.202269 | 0.432765  |
| C | -2.531960 | -0.689303 | 0.737366  | -0.178816 |
| C | -3.530092 | -1.538511 | 0.404639  | -0.057100 |
| C | -4.281188 | -2.374028 | 1.382975  | -0.513156 |
| C | -2.451035 | 0.427340  | -1.544569 | -0.376044 |
| C | -3.738455 | 1.277908  | -1.461653 | -0.458097 |
| H | -0.681228 | 0.555134  | 2.281252  | 0.214847  |
| H | 2.804352  | 2.874284  | -0.662241 | 0.184975  |
| H | 2.836434  | 3.069592  | 1.105746  | 0.230254  |
| H | 1.765371  | 4.095937  | 0.126214  | 0.186012  |
| H | 1.496140  | 1.913532  | -2.274691 | 0.186559  |
| H | 1.476475  | 0.292136  | -1.554044 | 0.212574  |
| H | 0.147627  | 0.836289  | -2.599480 | 0.176630  |
| H | -0.000676 | 3.784575  | -1.238949 | 0.196161  |
| H | -1.198226 | 3.341692  | -0.013648 | 0.182003  |
| H | -1.390651 | 2.830554  | -1.711073 | 0.180121  |
| H | -4.165585 | -3.438725 | 1.139522  | 0.209305  |
| H | -5.356529 | -2.162885 | 1.309925  | 0.209214  |
| H | -3.957888 | -2.209081 | 2.413910  | 0.190158  |
| H | -3.818712 | -1.662244 | -0.637556 | 0.181570  |
| H | -2.258214 | -0.626279 | 1.784511  | 0.181389  |

|    |           |           |           |          |
|----|-----------|-----------|-----------|----------|
| H  | -2.695205 | -0.548761 | -1.979207 | 0.200400 |
| H  | -1.747593 | 0.885285  | -2.232545 | 0.186419 |
| H  | 1.042008  | -1.129829 | 2.557442  | 0.216638 |
| H  | -0.343216 | -1.802116 | 1.705789  | 0.167812 |
| H  | -0.149217 | -2.688923 | -0.540441 | 0.115940 |
| H  | 1.316114  | -3.484226 | -2.369559 | 0.150467 |
| H  | 3.731916  | -2.896935 | -2.374817 | 0.159031 |
| H  | 4.671471  | -1.521901 | -0.528276 | 0.159674 |
| H  | 3.204944  | -0.720373 | 1.297891  | 0.169932 |
| H  | -4.506678 | 0.793019  | -0.855371 | 0.176138 |
| H  | -3.544112 | 2.264860  | -1.033016 | 0.179783 |
| H  | -4.137033 | 1.418784  | -2.470289 | 0.196129 |
| XX | 2.237349  | -2.080291 | -0.547840 | 0.000000 |

### 13(E)-b1

B3LYP/6-31G(d) energy=-924.7941150000

Zero-point correction (ZPC)=0.4304910000

Number of Imaginary Frequencies=0

|   |           |           |           |           |
|---|-----------|-----------|-----------|-----------|
| C | 2.419970  | -2.091193 | -0.403445 | -0.197812 |
| C | 1.554807  | -1.561000 | 0.567138  | 0.161332  |
| C | 2.100372  | -0.816452 | 1.620633  | -0.189139 |
| C | 3.475837  | -0.584965 | 1.693840  | -0.130563 |
| C | 4.324281  | -1.099975 | 0.712978  | -0.130215 |
| C | 3.793425  | -1.859238 | -0.334478 | -0.130170 |
| C | 0.069707  | -1.823139 | 0.483697  | -0.376394 |
| C | -0.747559 | -1.020774 | -0.575269 | -0.087277 |
| N | -1.035493 | 0.395882  | -0.209117 | -0.488576 |
| C | -2.511196 | 0.544913  | 0.206313  | 0.336501  |
| N | -3.030414 | -0.783215 | -0.138594 | -0.462890 |
| C | -2.126319 | -1.656862 | -0.661885 | 0.618855  |
| C | -0.156351 | 1.379627  | -0.335660 | 0.423496  |
| C | -0.372892 | 2.737870  | 0.295439  | -0.370446 |
| C | 0.473208  | 2.898726  | 1.582405  | -0.461476 |
| O | -2.338213 | -2.783004 | -1.065938 | -0.485204 |
| C | -4.439818 | -1.146437 | -0.024213 | -0.347930 |
| C | -2.654856 | 0.797143  | 1.715117  | -0.460439 |
| C | -3.237018 | 1.586630  | -0.666459 | -0.469674 |
| C | 1.079359  | 1.151468  | -1.060074 | -0.151793 |
| C | 1.975627  | 2.117217  | -1.373110 | -0.062623 |
| C | 3.204216  | 1.879576  | -2.180664 | -0.510479 |
| H | -0.273875 | -1.071653 | -1.556802 | 0.212070  |
| H | -4.815419 | -0.949445 | 0.983483  | 0.181868  |
| H | -4.500788 | -2.216618 | -0.226616 | 0.231099  |
| H | -5.058297 | -0.616031 | -0.754990 | 0.187727  |
| H | -3.714721 | 0.772599  | 1.983781  | 0.192968  |
| H | -2.141563 | 0.019138  | 2.286667  | 0.183397  |
| H | -2.268802 | 1.771952  | 2.016703  | 0.179157  |
| H | -4.310879 | 1.505543  | -0.478469 | 0.196631  |
| H | -3.061642 | 1.381594  | -1.726423 | 0.186159  |
| H | -2.960174 | 2.618284  | -0.452879 | 0.184025  |
| H | 4.089736  | 2.209889  | -1.621652 | 0.204386  |
| H | 3.179371  | 2.487589  | -3.095444 | 0.204821  |
| H | 3.330141  | 0.828998  | -2.452182 | 0.190900  |
| H | 1.824705  | 3.142384  | -1.042402 | 0.177627  |
| H | 1.295842  | 0.149561  | -1.402200 | 0.181683  |
| H | -0.101064 | 3.512242  | -0.426240 | 0.196975  |
| H | -1.413276 | 2.908764  | 0.545766  | 0.180685  |
| H | -0.401776 | -1.672359 | 1.461413  | 0.168685  |
| H | -0.107803 | -2.869332 | 0.208422  | 0.223013  |
| H | 2.018105  | -2.707447 | -1.205629 | 0.150492  |
| H | 4.451979  | -2.288954 | -1.084036 | 0.160674  |
| H | 5.395415  | -0.931100 | 0.774710  | 0.159873  |
| H | 3.884991  | -0.017743 | 2.525180  | 0.154605  |
| H | 1.448727  | -0.433703 | 2.403364  | 0.130477  |

H 0.304474 3.898011 1.994183 0.195996  
H 0.183496 2.165725 2.341347 0.175612  
H 1.541354 2.778678 1.388608 0.181084

### 13(E)-b2

B3LYP/6-31G(d) energy=-924.7944169000

Zero-point correction (ZPC)= 0.4305770000

Number of Imaginary Frequencies=0

C 2.550281 -1.930208 -0.589387 -0.194140  
C 1.565078 -1.658862 0.372559 0.171254  
C 1.952337 -1.086235 1.591512 -0.193137  
C 3.289010 -0.768108 1.837760 -0.131487  
C 4.258225 -1.026301 0.866583 -0.133665  
C 3.886600 -1.614875 -0.346147 -0.130519  
C 0.119916 -2.002956 0.105973 -0.377301  
C -0.707372 -0.991617 -0.745012 -0.097699  
N -0.963105 0.324088 -0.095372 -0.481754  
C -2.390645 0.341643 0.479731 0.334774  
N -2.972615 -0.814467 -0.213474 -0.461159  
C -2.099676 -1.571349 -0.936035 0.625124  
C -0.079735 1.310990 -0.074901 0.429402  
C -0.284791 2.566557 0.745844 -0.379957  
C -0.565484 3.841373 -0.080069 -0.457392  
O -2.346501 -2.572083 -1.579121 -0.483834  
C -4.384052 -1.175907 -0.126470 -0.348870  
C -2.372671 0.109205 2.000888 -0.458744  
C -3.179952 1.597893 0.082689 -0.474281  
C 1.122346 1.221567 -0.884281 -0.153342  
C 2.178596 2.062191 -0.794531 -0.053400  
C 3.373249 2.002148 -1.682313 -0.509056  
H -0.249404 -0.849340 -1.723812 0.212624  
H -4.718140 -1.212855 0.914531 0.180609  
H -4.478468 -2.169199 -0.567732 0.230997  
H -5.015986 -0.480995 -0.688023 0.188916  
H -3.401237 0.019845 2.362303 0.192900  
H -1.844728 -0.814592 2.248908 0.184407  
H -1.908618 0.935652 2.543809 0.180934  
H -4.235744 1.418349 0.301660 0.198094  
H -3.086858 1.793372 -0.989289 0.185052  
H -2.893931 2.485660 0.643957 0.182288  
H 4.282909 1.876357 -1.082034 0.205251  
H 3.489296 2.953334 -2.219825 0.202158  
H 3.314893 1.189110 -2.409772 0.187193  
H 2.200023 2.838618 -0.033051 0.176261  
H 1.183735 0.430820 -1.620327 0.172971  
H 0.638153 2.710437 1.318870 0.203110  
H -1.064300 2.422234 1.488558 0.181922  
H -0.408945 -2.168542 1.050791 0.173497  
H 0.045441 -2.939647 -0.458174 0.218786  
H 2.271954 -2.411251 -1.525087 0.148516  
H 4.640911 -1.846832 -1.092742 0.159919  
H 5.301377 -0.795053 1.062482 0.159536  
H 3.576193 -0.338630 2.793482 0.154886  
H 1.206786 -0.907977 2.363858 0.129296  
H -0.687116 4.688024 0.601648 0.194032  
H 0.255095 4.069615 -0.763465 0.176155  
H -1.478802 3.749915 -0.672992 0.178956

### 13(E)-c1

B3LYP/6-31G(d) energy=-924.7958224000

Zero-point correction (ZPC)= 0.4308450000

Number of Imaginary Frequencies=0

C 2.746074 -1.870605 -0.170346 -0.194789  
C 2.266564 -0.811129 0.614946 0.142252

C 3.162601 0.177771 1.043081 -0.200043  
C 4.513296 0.115303 0.691671 -0.129650  
C 4.980037 -0.936221 -0.097473 -0.124317  
C 4.093900 -1.927983 -0.525282 -0.129159  
C 0.803275 -0.741968 1.013473 -0.373834  
C -0.176009 -0.782131 -0.208133 -0.074962  
N -1.274067 0.228051 -0.150371 -0.492114  
C -2.642762 -0.460854 -0.064321 0.336347  
N -2.244841 -1.871513 -0.117635 -0.463497  
C -0.912128 -2.108722 -0.265762 0.608731  
C -1.037289 1.524955 -0.251430 0.417470  
C -2.107017 2.569803 -0.028137 -0.371754  
C -1.976073 3.234401 1.363776 -0.461212  
O -0.369604 -3.192069 -0.378157 -0.483781  
C -3.203631 -2.972417 -0.105494 -0.349016  
C -3.347727 -0.166169 1.268421 -0.461022  
C -3.498178 -0.138268 -1.303805 -0.464544  
C 0.317782 1.967249 -0.532688 -0.177680  
C 0.670659 3.249846 -0.789173 -0.059594  
C 2.057919 3.675591 -1.121861 -0.517899  
H 0.375827 -0.653519 -1.143085 0.224019  
H -3.810473 -2.959945 0.804241 0.184651  
H -2.617383 -3.892000 -0.129890 0.232361  
H -3.858270 -2.947837 -0.981980 0.186328  
H -4.228129 -0.808921 1.353630 0.194402  
H -2.683891 -0.384225 2.109847 0.184334  
H -3.697275 0.864046 1.344900 0.179701  
H -4.394190 -0.764550 -1.285466 0.195822  
H -2.941492 -0.365931 -2.217365 0.186298  
H -3.837180 0.896979 -1.344988 0.182788  
H 2.383421 4.467691 -0.434083 0.205410  
H 2.083267 4.121473 -2.125877 0.209787  
H 2.771714 2.849263 -1.080630 0.199873  
H -0.073535 4.043351 -0.771042 0.181029  
H 1.106491 1.226223 -0.569360 0.198832  
H -2.018936 3.329762 -0.809394 0.198372  
H -3.102894 2.151684 -0.126794 0.183148  
H 0.617781 0.168691 1.591871 0.162841  
H 0.555985 -1.583988 1.669643 0.209713  
H 2.063952 -2.655308 -0.488183 0.178084  
H 4.454424 -2.755237 -1.129869 0.158250  
H 6.029747 -0.987987 -0.371309 0.156836  
H 5.198389 0.882829 1.040748 0.150059  
H 2.807451 0.991989 1.672030 0.127090  
H -2.780394 3.965457 1.486192 0.198519  
H -2.061731 2.497787 2.168100 0.178426  
H -1.021250 3.752289 1.480641 0.177278

### 13(E)-c2

B3LYP/6-31G(d) energy=-924.7962335000

Zero-point correction (ZPC)= 0.4309060000

Number of Imaginary Frequencies=0

C 2.820341 -1.738556 -0.420115 -0.195147  
C 2.349940 -0.792957 0.503696 0.141620  
C 3.236046 0.173995 0.997420 -0.199787  
C 4.567900 0.200639 0.576753 -0.129741  
C 5.025473 -0.737777 -0.348706 -0.124121  
C 4.148939 -1.706224 -0.844154 -0.129266  
C 0.909402 -0.822773 0.981152 -0.370091  
C -0.132382 -0.760966 -0.185825 -0.084505  
N -1.263583 0.186848 0.040359 -0.487612  
C -2.572273 -0.586109 0.250034 0.333597  
N -2.151683 -1.939773 -0.127578 -0.461778  
C -0.823338 -2.099191 -0.380017 0.612596

|   |           |           |           |           |
|---|-----------|-----------|-----------|-----------|
| C | -1.085485 | 1.495995  | 0.058315  | 0.420873  |
| C | -2.209782 | 2.475065  | 0.311299  | -0.376014 |
| C | -2.677601 | 3.214425  | -0.963398 | -0.458960 |
| O | -0.253944 | -3.131897 | -0.679752 | -0.483196 |
| C | -3.067044 | -3.075539 | -0.186778 | -0.349573 |
| C | -2.974309 | -0.547834 | 1.735286  | -0.455034 |
| C | -3.694910 | -0.133433 | -0.695652 | -0.470920 |
| C | 0.245440  | 2.022563  | -0.196039 | -0.178225 |
| C | 0.599525  | 3.322783  | -0.061009 | -0.059769 |
| C | 1.967969  | 3.842672  | -0.332829 | -0.517699 |
| H | 0.363216  | -0.498122 | -1.123621 | 0.225283  |
| H | -3.637218 | -3.173350 | 0.741548  | 0.182144  |
| H | -2.449477 | -3.964596 | -0.321962 | 0.231905  |
| H | -3.756757 | -2.994346 | -1.032358 | 0.189089  |
| H | -3.832612 | -1.206775 | 1.893849  | 0.193866  |
| H | -2.151702 | -0.900470 | 2.363686  | 0.185333  |
| H | -3.267445 | 0.451102  | 2.065435  | 0.180376  |
| H | -4.500558 | -0.870845 | -0.648693 | 0.197812  |
| H | -3.337589 | -0.089761 | -1.728414 | 0.185635  |
| H | -4.133560 | 0.824510  | -0.420414 | 0.181754  |
| H | 2.348358  | 4.382510  | 0.544492  | 0.204901  |
| H | 1.932515  | 4.580450  | -1.146688 | 0.209026  |
| H | 2.672150  | 3.051285  | -0.600521 | 0.199971  |
| H | -0.126410 | 4.061797  | 0.272250  | 0.180923  |
| H | 1.024093  | 1.332112  | -0.497004 | 0.196461  |
| H | -1.845878 | 3.207457  | 1.038560  | 0.199231  |
| H | -3.055382 | 1.987327  | 0.787184  | 0.184122  |
| H | 0.729434  | 0.012797  | 1.664783  | 0.164134  |
| H | 0.723738  | -1.740268 | 1.551325  | 0.207092  |
| H | 2.147016  | -2.505791 | -0.794250 | 0.178916  |
| H | 4.502335  | -2.446208 | -1.556469 | 0.158315  |
| H | 6.060655  | -0.720098 | -0.676762 | 0.156862  |
| H | 5.246288  | 0.948558  | 0.977707  | 0.149604  |
| H | 2.889115  | 0.899050  | 1.731185  | 0.126246  |
| H | -3.484786 | 3.903688  | -0.699785 | 0.196758  |
| H | -1.868096 | 3.792618  | -1.414873 | 0.177000  |
| H | -3.056118 | 2.520361  | -1.718250 | 0.179828  |

### 13(Z)-a1

B3LYP/6-31G(d) energy=-924.7963599000

Zero-point correction (ZPC)=0.4307420000

Number of Imaginary Frequencies=0

|   |           |           |           |           |
|---|-----------|-----------|-----------|-----------|
| C | 1.303247  | -2.340233 | -0.247041 | -0.204670 |
| C | 1.847376  | -1.311128 | 0.534359  | 0.148151  |
| C | 3.103613  | -0.792605 | 0.181603  | -0.190977 |
| C | 3.783532  | -1.278956 | -0.935716 | -0.132638 |
| C | 3.224585  | -2.295325 | -1.713954 | -0.127475 |
| C | 1.983696  | -2.829867 | -1.363682 | -0.128967 |
| C | 1.106155  | -0.782650 | 1.746031  | -0.383634 |
| C | 0.330309  | 0.548557  | 1.546211  | -0.088880 |
| N | -0.701806 | 0.558866  | 0.467802  | -0.474951 |
| C | -0.288816 | 1.528085  | -0.660254 | 0.339924  |
| N | 0.885326  | 2.165102  | -0.053461 | -0.462418 |
| C | 1.276323  | 1.670112  | 1.151100  | 0.634057  |
| C | -1.852398 | -0.080821 | 0.555640  | 0.421576  |
| C | -2.247356 | -0.781286 | 1.841390  | -0.376226 |
| C | -2.349940 | -2.318552 | 1.744786  | -0.466760 |
| O | 2.225965  | 2.025898  | 1.823357  | -0.498596 |
| C | 1.639139  | 3.231709  | -0.704495 | -0.348539 |
| C | 0.117801  | 0.783032  | -1.942006 | -0.474579 |
| C | -1.373825 | 2.593162  | -0.890334 | -0.463147 |
| C | -2.780036 | -0.141106 | -0.563399 | -0.173792 |
| C | -4.088808 | -0.465651 | -0.459680 | -0.055151 |
| C | -5.026648 | -0.548078 | -1.614280 | -0.513155 |

|    |           |           |           |          |
|----|-----------|-----------|-----------|----------|
| H  | -5.487471 | -1.544205 | -1.654045 | 0.209509 |
| H  | -1.577329 | -0.513027 | 2.655992  | 0.195866 |
| H  | -3.229029 | -0.378622 | 2.119240  | 0.201695 |
| H  | -0.137887 | 0.834416  | 2.492035  | 0.216014 |
| H  | 2.456770  | 3.487276  | -0.029115 | 0.230168 |
| H  | 1.020459  | 4.119266  | -0.864577 | 0.184940 |
| H  | 2.057135  | 2.899221  | -1.659303 | 0.185618 |
| H  | -0.730729 | 0.334555  | -2.462011 | 0.176164 |
| H  | 0.565188  | 1.502563  | -2.633458 | 0.187523 |
| H  | 0.852578  | 0.005814  | -1.724981 | 0.214471 |
| H  | -0.985041 | 3.341506  | -1.585948 | 0.194187 |
| H  | -1.622255 | 3.095757  | 0.048944  | 0.182291 |
| H  | -2.285220 | 2.189956  | -1.330583 | 0.175117 |
| H  | -2.393584 | 0.070667  | -1.550262 | 0.171969 |
| H  | -4.537409 | -0.346984 | -2.570814 | 0.186885 |
| H  | -5.854211 | 0.161702  | -1.481355 | 0.209534 |
| H  | -4.527949 | -0.665879 | 0.515542  | 0.182976 |
| H  | 1.813210  | -0.552196 | 2.551001  | 0.216234 |
| H  | 0.423769  | -1.543232 | 2.134956  | 0.168964 |
| H  | 0.347509  | -2.781716 | 0.027101  | 0.125249 |
| H  | 1.551361  | -3.636020 | -1.949729 | 0.151934 |
| H  | 3.760166  | -2.679558 | -2.577137 | 0.158733 |
| H  | 4.758670  | -0.873002 | -1.189228 | 0.159191 |
| H  | 3.553157  | -0.013271 | 0.790416  | 0.172308 |
| H  | -2.681629 | -2.712457 | 2.709499  | 0.198246 |
| H  | -3.065824 | -2.633507 | 0.982117  | 0.173695 |
| H  | -1.384557 | -2.774557 | 1.511001  | 0.191232 |
| XX | 2.546429  | -1.787351 | -0.581229 | 0.000000 |

### 13(Z)-a2

B3LYP/6-31G(d) energy=-924.7975495000

Zero-point correction (ZPC)=0.4308820000

Number of Imaginary Frequencies=0

|   |           |           |           |           |
|---|-----------|-----------|-----------|-----------|
| C | -1.467164 | 2.296105  | 0.632629  | -0.195068 |
| C | -1.920735 | 1.020513  | 0.996905  | 0.149494  |
| C | -3.141670 | 0.563866  | 0.476341  | -0.191759 |
| C | -3.877793 | 1.359412  | -0.402810 | -0.133461 |
| C | -3.409468 | 2.623504  | -0.769316 | -0.127448 |
| C | -2.203815 | 3.093537  | -0.245372 | -0.129212 |
| C | -1.112756 | 0.164975  | 1.948802  | -0.387198 |
| C | -0.233071 | -0.943074 | 1.296295  | -0.082153 |
| N | 0.706940  | -0.500258 | 0.225587  | -0.476717 |
| C | 0.282076  | -1.074895 | -1.139076 | 0.341592  |
| N | -0.799715 | -1.976105 | -0.726733 | -0.462108 |
| C | -1.118546 | -1.961155 | 0.595427  | 0.630832  |
| C | 1.808999  | 0.182963  | 0.475167  | 0.420314  |
| C | 2.269102  | 0.347236  | 1.909311  | -0.377243 |
| C | 3.197365  | -0.818021 | 2.331210  | -0.464684 |
| O | -1.982588 | -2.610910 | 1.153623  | -0.498561 |
| C | -1.529593 | -2.823652 | -1.664100 | -0.348454 |
| C | -0.260586 | 0.006911  | -2.086552 | -0.473495 |
| C | 1.420405  | -1.910567 | -1.750618 | -0.464316 |
| C | 2.626439  | 0.736776  | -0.587751 | -0.167948 |
| C | 3.829208  | 1.330475  | -0.403024 | -0.053984 |
| C | 4.646792  | 1.921750  | -1.497968 | -0.513752 |
| H | 4.849030  | 2.980422  | -1.286479 | 0.211066  |
| H | 1.423284  | 0.398735  | 2.590843  | 0.200861  |
| H | 2.793978  | 1.298361  | 2.011282  | 0.193040  |
| H | 0.328843  | -1.461077 | 2.078017  | 0.211764  |
| H | -2.275694 | -3.361488 | -1.077575 | 0.229810  |
| H | -0.868416 | -3.548714 | -2.147526 | 0.184452  |
| H | -2.037844 | -2.226309 | -2.426606 | 0.185712  |
| H | 0.513914  | 0.689746  | -2.439482 | 0.175078  |
| H | -0.677689 | -0.482908 | -2.971014 | 0.186183  |

|    |           |           |           |          |
|----|-----------|-----------|-----------|----------|
| H  | -1.049372 | 0.585784  | -1.603650 | 0.215117 |
| H  | 1.040266  | -2.422039 | -2.638828 | 0.194469 |
| H  | 1.760991  | -2.668958 | -1.039669 | 0.181295 |
| H  | 2.274380  | -1.312318 | -2.068095 | 0.174639 |
| H  | 2.241518  | 0.702146  | -1.596137 | 0.167348 |
| H  | 4.165780  | 1.841151  | -2.476077 | 0.187602 |
| H  | 5.628706  | 1.431284  | -1.542847 | 0.210293 |
| H  | 4.265259  | 1.392058  | 0.591524  | 0.185115 |
| H  | -1.774542 | -0.395258 | 2.619061  | 0.218527 |
| H  | -0.494245 | 0.806656  | 2.582489  | 0.174642 |
| H  | -0.540719 | 2.680575  | 1.055533  | 0.120331 |
| H  | -1.844083 | 4.084403  | -0.507987 | 0.151712 |
| H  | -3.989336 | 3.245186  | -1.445241 | 0.158704 |
| H  | -4.826125 | 0.997266  | -0.789506 | 0.159071 |
| H  | -3.520595 | -0.411402 | 0.769798  | 0.169796 |
| H  | 3.519076  | -0.662085 | 3.364689  | 0.203587 |
| H  | 2.684889  | -1.783972 | 2.280466  | 0.178926 |
| H  | 4.087754  | -0.875239 | 1.698994  | 0.176153 |
| XX | -2.673162 | 1.805615  | 0.115164  | 0.000000 |

### 13(Z)-b1

B3LYP/6-31G(d) energy=-924.7919857000

Zero-point correction (ZPC)= 0.4302260000

Number of Imaginary Frequencies=0

|   |           |           |           |           |
|---|-----------|-----------|-----------|-----------|
| C | 3.020587  | -1.412618 | -0.723852 | -0.193311 |
| C | 2.117348  | -1.281059 | 0.342691  | 0.170438  |
| C | 2.540935  | -0.623373 | 1.505222  | -0.200747 |
| C | 3.836378  | -0.107906 | 1.603509  | -0.130093 |
| C | 4.722286  | -0.237913 | 0.533401  | -0.126056 |
| C | 4.310451  | -0.890516 | -0.632302 | -0.128033 |
| C | 0.747860  | -1.916935 | 0.274858  | -0.379470 |
| C | -0.317398 | -1.288950 | -0.671106 | -0.098774 |
| N | -0.893785 | 0.010924  | -0.222683 | -0.467457 |
| C | -2.259576 | -0.240446 | 0.450920  | 0.333575  |
| N | -2.533537 | -1.608291 | -0.003873 | -0.459453 |
| C | -1.520976 | -2.220975 | -0.679161 | 0.621727  |
| C | -0.378845 | 1.198559  | -0.487058 | 0.418735  |
| C | 0.768704  | 1.361165  | -1.463827 | -0.370125 |
| C | 2.003204  | 2.118142  | -0.937468 | -0.459328 |
| O | -1.522040 | -3.338676 | -1.154869 | -0.482761 |
| C | -3.796933 | -2.297515 | 0.241032  | -0.348500 |
| C | -2.140273 | -0.189077 | 1.983378  | -0.461103 |
| C | -3.359414 | 0.684533  | -0.094233 | -0.465285 |
| C | -0.918863 | 2.401725  | 0.132295  | -0.182134 |
| C | -0.833213 | 3.640274  | -0.400127 | -0.051893 |
| C | -1.370836 | 4.872609  | 0.242708  | -0.512771 |
| H | -0.571570 | 5.617137  | 0.355859  | 0.208943  |
| H | 1.093884  | 0.398870  | -1.850244 | 0.192646  |
| H | 0.342777  | 1.908812  | -2.318264 | 0.197474  |
| H | 0.069201  | -1.203149 | -1.685556 | 0.212243  |
| H | -3.644368 | -3.337915 | -0.049552 | 0.231136  |
| H | -4.610829 | -1.880552 | -0.360107 | 0.188549  |
| H | -4.068278 | -2.257130 | 1.300076  | 0.180577  |
| H | -1.896020 | 0.809576  | 2.352756  | 0.180696  |
| H | -3.099634 | -0.471532 | 2.426572  | 0.193137  |
| H | -1.381759 | -0.889383 | 2.340483  | 0.185815  |
| H | -4.323884 | 0.300904  | 2.483886  | 0.195644  |
| H | -3.361871 | 0.679248  | -1.188033 | 0.183067  |
| H | -3.281938 | 1.710504  | 0.260092  | 0.176817  |
| H | -1.410761 | 2.293396  | 1.090808  | 0.174328  |
| H | -1.811816 | 4.677738  | 1.223922  | 0.184644  |
| H | -2.128717 | 5.338289  | -0.401417 | 0.207059  |
| H | -0.373452 | 3.779293  | -1.376676 | 0.183805  |
| H | 0.318640  | -1.985910 | 1.280061  | 0.170059  |

|   |          |           |           |          |
|---|----------|-----------|-----------|----------|
| H | 0.835515 | -2.946873 | -0.091878 | 0.222996 |
| H | 2.724300 | -1.954524 | -1.620294 | 0.145529 |
| H | 5.001739 | -1.012076 | -1.461279 | 0.160464 |
| H | 5.732301 | 0.153647  | 0.610515  | 0.161499 |
| H | 4.154278 | 0.382628  | 2.519115  | 0.157240 |
| H | 1.864703 | -0.539333 | 2.353372  | 0.131843 |
| H | 2.752590 | 2.154629  | -1.732643 | 0.187112 |
| H | 1.770172 | 3.143637  | -0.643991 | 0.161101 |
| H | 2.443822 | 1.602700  | -0.082515 | 0.198476 |

### 13(Z)-b2

B3LYP/6-31G(d) energy=-924.7965413000

Zero-point correction (ZPC)= 0.4303920000

Number of Imaginary Frequencies=0

|   |           |           |           |           |
|---|-----------|-----------|-----------|-----------|
| C | 2.746074  | -1.870605 | -0.170346 | -0.194789 |
| C | 2.266564  | -0.811129 | 0.614946  | 0.142252  |
| C | 3.162601  | 0.177771  | 1.043081  | -0.200043 |
| C | 4.513296  | 0.115303  | 0.691671  | -0.129650 |
| C | 4.980037  | -0.936221 | -0.097473 | -0.124317 |
| C | 4.093900  | -1.927983 | -0.525282 | -0.129159 |
| C | 0.803275  | -0.741968 | 1.013473  | -0.373834 |
| C | -0.176009 | -0.782131 | -0.208133 | -0.074962 |
| N | -1.274067 | 0.228051  | -0.150371 | -0.492114 |
| C | -2.642762 | -0.460854 | -0.064321 | 0.336347  |
| N | -2.244841 | -1.871513 | -0.117635 | -0.463497 |
| C | -0.912128 | -2.108722 | -0.265762 | 0.608731  |
| C | -1.037289 | 1.524955  | -0.251430 | 0.417470  |
| C | -2.107017 | 2.569803  | -0.028137 | -0.371754 |
| C | -1.976073 | 3.234401  | 1.363776  | -0.461212 |
| O | -0.369604 | -3.192069 | -0.378157 | -0.483781 |
| C | -3.203631 | -2.972417 | -0.105494 | -0.349016 |
| C | -3.347727 | -0.166169 | 1.268421  | -0.461022 |
| C | -3.498178 | -0.138268 | -1.303805 | -0.464544 |
| C | 0.317782  | 1.967249  | -0.532688 | -0.177680 |
| C | 0.670659  | 3.249846  | -0.789173 | -0.059594 |
| C | 2.057919  | 3.675591  | -1.121861 | -0.517899 |
| H | 0.375827  | -0.653519 | -1.143085 | 0.224019  |
| H | -3.810473 | -2.959945 | 0.804241  | 0.184651  |
| H | -2.617383 | -3.892000 | -0.129890 | 0.232361  |
| H | -3.858270 | -2.947837 | -0.981980 | 0.186328  |
| H | -4.228129 | -0.808921 | 1.353630  | 0.194402  |
| H | -2.683891 | -0.384225 | 2.109847  | 0.184334  |
| H | -3.697275 | 0.864046  | 1.344900  | 0.179701  |
| H | -4.394190 | -0.764550 | -1.285466 | 0.195822  |
| H | -2.941492 | -0.365931 | -2.217365 | 0.186298  |
| H | -3.837180 | 0.896979  | -1.344988 | 0.182788  |
| H | 2.383421  | 4.467691  | -0.434083 | 0.205410  |
| H | 2.083267  | 4.121473  | -2.125877 | 0.209787  |
| H | 2.771714  | 2.849263  | -1.080630 | 0.199873  |
| H | -0.073535 | 4.043351  | -0.771042 | 0.181029  |
| H | 1.106491  | 1.226223  | -0.569360 | 0.198832  |
| H | -2.018936 | 3.329762  | -0.809394 | 0.198372  |
| H | -3.102894 | 2.151684  | -0.126794 | 0.183148  |
| H | 0.617781  | 0.168691  | 1.591871  | 0.162841  |
| H | 0.555985  | -1.583988 | 1.669643  | 0.209713  |
| H | 2.063952  | -2.655308 | -0.488183 | 0.178084  |
| H | 4.454424  | -2.755237 | -1.129869 | 0.158250  |
| H | 6.029747  | -0.987987 | -0.371309 | 0.156836  |
| H | 5.198389  | 0.882829  | 1.040748  | 0.150059  |
| H | 2.807451  | 0.991989  | 1.672030  | 0.127090  |
| H | -2.780394 | 3.965457  | 1.486192  | 0.198519  |
| H | -2.061731 | 2.497787  | 2.168100  | 0.178426  |
| H | -1.021250 | 3.752289  | 1.480641  | 0.177278  |

**13(Z)-c1**

B3LYP/6-31G(d) energy=-924.7939203000

Zero-point correction (ZPC)= 0.4305700000

Number of Imaginary Frequencies=0

|   |           |           |           |           |
|---|-----------|-----------|-----------|-----------|
| C | -3.227614 | -1.372624 | 0.861172  | -0.200040 |
| C | -2.696691 | -0.145069 | 0.444022  | 0.147201  |
| C | -3.453445 | 0.665889  | -0.415893 | -0.197501 |
| C | -4.707947 | 0.244405  | -0.856659 | -0.129699 |
| C | -5.227104 | -0.983803 | -0.440572 | -0.123774 |
| C | -4.486347 | -1.790008 | 0.423544  | -0.126504 |
| C | -1.334182 | 0.305642  | 0.941360  | -0.371930 |
| C | -0.361416 | 0.725551  | -0.209599 | -0.087251 |
| N | 1.038156  | 0.221494  | -0.067333 | -0.480565 |
| C | 2.004645  | 1.386609  | 0.194532  | 0.335309  |
| N | 1.115187  | 2.532794  | -0.011865 | -0.461902 |
| C | -0.189704 | 2.234904  | -0.261246 | 0.612001  |
| C | 1.365865  | -1.046251 | -0.229807 | 0.417709  |
| C | 0.303909  | -2.064948 | -0.592348 | -0.384314 |
| C | 0.079818  | -3.141949 | 0.492726  | -0.458523 |
| O | -1.093215 | 3.025028  | -0.460364 | -0.481494 |
| C | 1.571431  | 3.918578  | 0.042200  | -0.349186 |
| C | 2.499867  | 1.360211  | 1.651054  | -0.459893 |
| C | 3.135164  | 1.440658  | -0.845963 | -0.463259 |
| C | 2.728779  | -1.519137 | -0.040256 | -0.174678 |
| C | 3.205228  | -2.682557 | -0.538088 | -0.052896 |
| C | 4.598565  | -3.172235 | -0.343311 | -0.513537 |
| H | 4.585157  | -4.167794 | 0.120366  | 0.210028  |
| H | -0.648764 | -1.587465 | -0.814676 | 0.211376  |
| H | 0.627011  | -2.551925 | -1.520892 | 0.201373  |
| H | -0.756475 | 0.397501  | -1.173583 | 0.226621  |
| H | 0.679925  | 4.541078  | -0.045004 | 0.232495  |
| H | 2.248163  | 4.152340  | -0.785170 | 0.187881  |
| H | 2.067587  | 4.135868  | 0.992547  | 0.182890  |
| H | 3.158065  | 0.515730  | 1.864197  | 0.181333  |
| H | 3.070340  | 2.271209  | 1.851925  | 0.194538  |
| H | 1.652470  | 1.328124  | 2.341576  | 0.186448  |
| H | 3.687316  | 2.374045  | -0.707859 | 0.195451  |
| H | 2.720695  | 1.436327  | -1.858217 | 0.185782  |
| H | 3.854064  | 0.627813  | -0.753217 | 0.175893  |
| H | 3.407483  | -0.906390 | 0.535953  | 0.169974  |
| H | 5.198850  | -2.501989 | 0.277383  | 0.186080  |
| H | 5.095627  | -3.298689 | -1.314435 | 0.209804  |
| H | 2.564083  | -3.318169 | -1.145528 | 0.183989  |
| H | -0.870168 | -0.492614 | 1.528094  | 0.158939  |
| H | -1.445622 | 1.160630  | 1.618654  | 0.206493  |
| H | -2.665158 | -2.000844 | 1.548378  | 0.125810  |
| H | -4.886382 | -2.741986 | 0.760846  | 0.150527  |
| H | -6.206151 | -1.306381 | -0.782564 | 0.155826  |
| H | -5.285087 | 0.882726  | -1.519534 | 0.156426  |
| H | -3.064802 | 1.632942  | -0.724509 | 0.178307  |
| H | -0.734861 | -3.797356 | 0.173646  | 0.199830  |
| H | 0.970117  | -3.752401 | 0.657689  | 0.171399  |
| H | -0.204076 | -2.695761 | 1.450029  | 0.179248  |

**13(Z)-c2**

B3LYP/6-31G(d) energy=-924.7962599000

Zero-point correction (ZPC)= 0.4305050000

Number of Imaginary Frequencies=0

|   |          |           |           |           |
|---|----------|-----------|-----------|-----------|
| C | 3.134474 | -1.383897 | -1.129277 | -0.196007 |
| C | 2.668805 | -0.158836 | -0.633844 | 0.144716  |
| C | 3.488741 | 0.583784  | 0.229657  | -0.195786 |
| C | 4.745233 | 0.099638  | 0.592913  | -0.129922 |
| C | 5.201348 | -1.124305 | 0.096827  | -0.124271 |
| C | 4.395141 | -1.864414 | -0.767810 | -0.127156 |

|   |           |           |           |           |
|---|-----------|-----------|-----------|-----------|
| C | 1.301461  | 0.358157  | -1.042194 | -0.372480 |
| C | 0.366591  | 0.674523  | 0.176117  | -0.085535 |
| N | -1.033460 | 0.192139  | 0.002194  | -0.476668 |
| C | -1.985054 | 1.373427  | -0.214182 | 0.336902  |
| N | -1.098962 | 2.496225  | 0.110732  | -0.461573 |
| C | 0.201147  | 2.173730  | 0.361148  | 0.611254  |
| C | -1.351543 | -1.087250 | 0.076467  | 0.413513  |
| C | -0.300844 | -2.071779 | 0.547522  | -0.385606 |
| C | -0.318807 | -2.223325 | 2.088439  | -0.463436 |
| O | 1.102695  | 2.940568  | 0.642591  | -0.482508 |
| C | -1.551493 | 3.883216  | 0.156304  | -0.348828 |
| C | -2.429412 | 1.456383  | -1.684664 | -0.457553 |
| C | -3.152680 | 1.355170  | 0.785955  | -0.465926 |
| C | -2.678752 | -1.571313 | -0.251185 | -0.170930 |
| C | -3.102651 | -2.841063 | -0.047521 | -0.051813 |
| C | -4.459630 | -3.338126 | -0.405159 | -0.514181 |
| H | -4.378016 | -4.193424 | -1.089450 | 0.211738  |
| H | 0.696168  | -1.770655 | 0.225301  | 0.217722  |
| H | -0.486088 | -3.039462 | 0.078624  | 0.189994  |
| H | 0.785146  | 0.254390  | 1.092211  | 0.222743  |
| H | -0.659390 | 4.496075  | 0.292817  | 0.231778  |
| H | -2.231488 | 4.058172  | 0.995578  | 0.187821  |
| H | -2.043191 | 4.170288  | -0.777832 | 0.182242  |
| H | -3.071438 | 0.624804  | -1.981707 | 0.179389  |
| H | -3.000407 | 2.376625  | -1.836415 | 0.193448  |
| H | -1.559001 | 1.481079  | -2.346206 | 0.186761  |
| H | -3.694984 | 2.300766  | 0.703802  | 0.196247  |
| H | -2.775539 | 1.265689  | 1.808757  | 0.185236  |
| H | -3.872690 | 0.558851  | 0.601683  | 0.175871  |
| H | -3.375664 | -0.884862 | -0.709654 | 0.166101  |
| H | -5.083161 | -2.570190 | -0.870034 | 0.187007  |
| H | -4.970646 | -3.717228 | 0.490279  | 0.210915  |
| H | -2.442837 | -3.572244 | 0.414229  | 0.187109  |
| H | 0.806028  | -0.373543 | -1.688971 | 0.161591  |
| H | 1.407042  | 1.274273  | -1.635096 | 0.205147  |
| H | 2.517162  | -1.959570 | -1.816632 | 0.126198  |
| H | 4.745534  | -2.812587 | -1.165526 | 0.151240  |
| H | 6.182496  | -1.495227 | 0.378474  | 0.156004  |
| H | 5.373135  | 0.684482  | 1.258973  | 0.156837  |
| H | 3.144139  | 1.543496  | 0.606644  | 0.178048  |
| H | 0.448810  | -2.944141 | 2.382809  | 0.205021  |
| H | -0.101594 | -1.277376 | 2.594366  | 0.178616  |
| H | -1.286580 | -2.583893 | 2.448688  | 0.173097  |

**14(E)-a1u**

B3LYP/6-31G(d) energy=-1114.3211932000

Zero-point correction (ZPC)= 0.452872

Number of Imaginary Frequencies=0

|   |           |           |           |           |
|---|-----------|-----------|-----------|-----------|
| C | 1.256310  | 3.135738  | 0.190607  | -0.188389 |
| C | 0.886709  | 1.837494  | 0.405995  | 0.164411  |
| O | 1.657401  | 0.998011  | -0.349277 | -0.184920 |
| C | 2.526144  | 1.779623  | -1.068276 | -0.131868 |
| C | 2.312904  | 3.096674  | -0.768340 | -0.129659 |
| C | -0.057041 | 1.253900  | 1.396006  | -0.131616 |
| N | 0.580249  | 0.405419  | 2.385161  | -0.387185 |
| C | 0.081157  | -0.855948 | 2.494217  | -0.075040 |
| C | -1.076586 | -1.004441 | 1.510164  | 0.637409  |
| N | -1.157005 | 0.337634  | 0.866112  | -0.455615 |
| C | -0.887587 | -2.239916 | 0.591987  | 0.082705  |
| C | 0.309680  | -2.261283 | -0.334870 | -0.467640 |
| C | 0.148181  | -1.985839 | -1.698997 | 0.350151  |
| C | 1.223324  | -2.094228 | -2.582330 | -0.470640 |
| C | 2.478528  | -2.478904 | -2.107443 | 0.357128  |
| C | 2.652704  | -2.746699 | -0.747624 | -0.210637 |

|    |           |           |           |           |
|----|-----------|-----------|-----------|-----------|
| C  | 1.575931  | -2.642402 | 0.132901  | -0.194342 |
| O  | 0.466781  | -1.738959 | 3.234865  | -0.530580 |
| C  | 1.686382  | 0.892993  | 3.197356  | -0.339546 |
| C  | -2.160182 | 0.754805  | 0.118461  | -0.493911 |
| C  | -3.300241 | -0.115128 | -0.100497 | 0.429676  |
| C  | -4.357977 | 0.191482  | -0.887845 | -0.364397 |
| C  | -5.544149 | -0.687452 | -1.077027 | -0.461948 |
| C  | 3.472585  | 1.081712  | -1.977227 | -0.176944 |
| C  | -2.133663 | 2.127689  | -0.507986 | -0.052845 |
| C  | -1.600061 | 2.088097  | -1.960314 | -0.513926 |
| H  | -1.985929 | -1.151574 | 2.103999  | 0.212659  |
| H  | 2.548718  | 1.140493  | 2.571580  | 0.194724  |
| H  | 1.951457  | 0.090841  | 3.887151  | 0.225043  |
| H  | 1.385445  | 1.779534  | 3.766424  | 0.179087  |
| H  | -5.666298 | -0.931542 | -2.141063 | 0.209777  |
| H  | -6.458174 | -0.153216 | -0.784190 | 0.210878  |
| H  | -5.477555 | -1.616522 | -0.505388 | 0.190879  |
| H  | -4.376240 | 1.130352  | -1.437175 | 0.184952  |
| H  | -3.323679 | -1.063511 | 0.420991  | 0.180038  |
| H  | -3.146435 | 2.536828  | -0.492984 | 0.191081  |
| H  | -1.515766 | 2.806476  | 0.078264  | 0.188954  |
| H  | -0.823659 | -3.070976 | 1.304189  | 0.214517  |
| H  | -1.798285 | -2.399306 | 0.008309  | 0.164767  |
| H  | -0.835211 | -1.718905 | -2.081695 | 0.116537  |
| H  | 1.074798  | -1.903410 | -3.641781 | 0.145379  |
| H  | 3.312026  | -2.587752 | -2.795775 | 0.151688  |
| H  | 3.622765  | -3.063217 | -0.374658 | 0.154122  |
| H  | 1.710692  | -2.883357 | 1.183706  | 0.168546  |
| H  | -2.235663 | 1.474672  | -2.605230 | 0.168498  |
| H  | -1.584067 | 3.105310  | -2.361239 | 0.193964  |
| H  | -0.584399 | 1.687828  | -1.997563 | 0.196025  |
| H  | -0.560144 | 2.098154  | 1.888593  | 0.193828  |
| H  | 0.838484  | 4.014478  | 0.664929  | 0.167648  |
| H  | 2.853822  | 3.938063  | -1.177718 | 0.172519  |
| H  | 4.123215  | 1.812639  | -2.463344 | 0.185845  |
| H  | 4.096311  | 0.369205  | -1.426181 | 0.191640  |
| H  | 2.939283  | 0.516812  | -2.749328 | 0.186701  |
| XX | 1.399765  | -2.375435 | -1.205895 | 0.000000  |

**14(E)-a2 $\alpha$**

B3LYP/6-31G(d) energy=-1114.3212477000

Zero-point correction (ZPC)= 0.452851

Number of Imaginary Frequencies=0

|   |           |           |           |           |
|---|-----------|-----------|-----------|-----------|
| C | 0.628775  | -2.396444 | -1.123162 | -0.462735 |
| C | 0.743383  | -2.228733 | 0.262807  | 0.348955  |
| C | 2.018115  | -2.269475 | 0.846662  | -0.195273 |
| C | 3.149500  | -2.481583 | 0.059137  | -0.208669 |
| C | 3.022746  | -2.661481 | -1.320308 | 0.359414  |
| C | 1.759262  | -2.612693 | -1.912458 | 0.078923  |
| C | -0.497999 | -2.116881 | 1.121961  | -0.453180 |
| C | -0.943536 | -0.711414 | 1.599323  | 0.639027  |
| C | 0.091319  | -0.064276 | 2.517486  | -0.075792 |
| N | 0.345987  | 1.193760  | 2.061468  | -0.463495 |
| C | -0.293839 | 1.549576  | 0.809322  | -0.386320 |
| N | -1.199726 | 0.342050  | 0.576610  | 0.166201  |
| C | 0.666138  | 1.906321  | -0.271350 | -0.184351 |
| O | 1.664919  | 1.028127  | -0.586194 | -0.130892 |
| C | 2.493188  | 1.656919  | -1.479849 | -0.132169 |
| C | 2.031620  | 2.921073  | -1.723299 | -0.130005 |
| C | 0.853991  | 3.087592  | -0.935950 | -0.186064 |
| C | 3.663868  | 0.889900  | -1.979000 | -0.493020 |
| C | 1.291625  | 2.092582  | 2.709267  | -0.339325 |
| O | 0.569768  | -0.602497 | 3.496124  | 0.426596  |
| C | -2.206898 | 0.338575  | -0.273328 | -0.174738 |

|    |           |           |           |           |
|----|-----------|-----------|-----------|-----------|
| C  | -2.440450 | 1.518546  | -1.183428 | -0.053858 |
| C  | -3.477637 | 2.506562  | -0.599700 | -0.513944 |
| C  | -3.153107 | -0.761537 | -0.262229 | -0.531468 |
| C  | -4.125818 | -0.951166 | -1.183933 | -0.378453 |
| C  | -5.119870 | -2.058664 | -1.137389 | -0.461691 |
| H  | -1.859964 | -0.830275 | 2.189687  | 0.212478  |
| H  | 2.163399  | 2.269366  | 2.072314  | 0.194554  |
| H  | 1.607423  | 1.608298  | 3.634103  | 0.224975  |
| H  | 0.812471  | 3.049425  | 2.942420  | 0.178877  |
| H  | -5.047029 | -2.669121 | -2.047623 | 0.210210  |
| H  | -6.138848 | -1.648567 | -1.130921 | 0.209699  |
| H  | -4.992429 | -2.704680 | -0.265235 | 0.190566  |
| H  | -4.212765 | -0.278909 | -2.035351 | 0.183693  |
| H  | -3.093341 | -1.470292 | 0.554965  | 0.179959  |
| H  | -0.346160 | -2.658602 | 2.062863  | 0.213619  |
| H  | -1.333471 | -2.605768 | 0.613424  | 0.164187  |
| H  | -0.356150 | -2.395677 | -1.586557 | 0.115135  |
| H  | 1.650888  | -2.767168 | -2.982571 | 0.146252  |
| H  | 3.902271  | -2.855919 | -1.927880 | 0.151801  |
| H  | 4.128401  | -2.533180 | 0.527528  | 0.153584  |
| H  | 2.119723  | -2.160531 | 1.923016  | 0.167089  |
| H  | -3.152750 | 2.924748  | 0.358813  | 0.172731  |
| H  | -3.614546 | 3.336259  | -1.298704 | 0.198266  |
| H  | -4.446843 | 2.024825  | -0.444096 | 0.177738  |
| H  | -0.950834 | 2.417676  | 0.948133  | 0.191961  |
| H  | 0.238514  | 3.975032  | -0.861644 | 0.167033  |
| H  | 2.486120  | 3.648996  | -2.380197 | 0.172462  |
| H  | 4.252614  | 1.515577  | -2.654138 | 0.185164  |
| H  | 4.306477  | 0.566498  | -1.152484 | 0.189833  |
| H  | 3.347299  | -0.009800 | -2.516734 | 0.190267  |
| H  | -2.798531 | 1.147853  | -2.147102 | 0.193264  |
| H  | -1.499524 | 2.028420  | -1.385506 | 0.201064  |
| XX | 1.888427  | -2.444735 | -0.513219 | 0.000000  |

**14(E)-a1 $\beta$**

B3LYP/6-31G(d) energy=-1114.3247280000

Zero-point correction (ZPC)= 0.45319

Number of Imaginary Frequencies=0

|   |           |           |           |           |
|---|-----------|-----------|-----------|-----------|
| C | 0.576059  | 1.608600  | -2.103616 | -0.487895 |
| C | 0.546275  | 2.279806  | -0.873477 | 0.343957  |
| C | -0.497838 | 3.183620  | -0.622059 | -0.185588 |
| C | -1.490416 | 3.402519  | -1.579424 | -0.218428 |
| C | -1.451502 | 2.725460  | -2.801390 | 0.358825  |
| C | -0.414833 | 1.827486  | -3.062323 | 0.077736  |
| C | 1.652840  | 2.074930  | 0.139372  | -0.461125 |
| C | 1.365937  | 1.090761  | 1.304394  | 0.633043  |
| C | 0.220472  | 1.589801  | 2.182599  | -0.077427 |
| N | -0.728652 | 0.615123  | 2.248218  | -0.465101 |
| C | -0.451804 | -0.586383 | 1.487664  | -0.383133 |
| N | 0.946535  | -0.292581 | 0.948442  | 0.153160  |
| C | -1.501360 | -0.916229 | 0.480422  | -0.193610 |
| O | -1.966969 | -2.210529 | 0.531834  | -0.139045 |
| C | -2.965776 | -2.324658 | -0.398115 | -0.131318 |
| C | -3.134102 | -1.124142 | -1.030692 | -0.126295 |
| C | -2.193869 | -0.210918 | -0.461270 | -0.188465 |
| C | -3.635386 | -3.648670 | -0.508817 | -0.493939 |
| C | -1.940444 | 0.740731  | 3.047428  | -0.339265 |
| O | 0.192477  | 2.681853  | 2.714959  | 0.428400  |
| C | 1.728612  | -1.206616 | 0.409729  | -0.177831 |
| C | 1.188881  | -2.573392 | 0.066411  | -0.052650 |
| C | 0.768511  | -2.673019 | -1.420312 | -0.513732 |
| C | 3.119768  | -0.890312 | 0.144998  | -0.533423 |
| C | 3.996581  | -1.732975 | -0.449433 | -0.379125 |
| C | 5.432540  | -1.418885 | -0.684832 | -0.464953 |



|    |           |           |           |          |
|----|-----------|-----------|-----------|----------|
| H  | 2.257216  | 1.027179  | 1.938250  | 0.214614 |
| H  | -2.829380 | 0.694706  | 2.412253  | 0.193033 |
| H  | -1.893685 | 1.708994  | 3.547311  | 0.224792 |
| H  | -1.988798 | -0.056293 | 3.797778  | 0.181770 |
| H  | 5.662284  | -1.483332 | -1.757063 | 0.209061 |
| H  | 6.066449  | -2.170843 | -0.195675 | 0.210786 |
| H  | 5.713286  | -0.427473 | -0.320616 | 0.190126 |
| H  | 3.665415  | -2.710199 | -0.794433 | 0.185037 |
| H  | 3.491436  | 0.075569  | 0.464141  | 0.178359 |
| H  | 1.961764  | -3.314231 | 0.285044  | 0.190859 |
| H  | 0.332129  | -2.825232 | 0.690782  | 0.208613 |
| H  | 1.873162  | 3.018628  | 0.651280  | 0.215471 |
| H  | 2.569919  | 1.774123  | -0.375172 | 0.167356 |
| H  | 1.397085  | 0.930207  | -2.327001 | 0.122022 |
| H  | -0.368326 | 1.310361  | -4.016549 | 0.150708 |
| H  | -2.215687 | 2.909264  | -3.551123 | 0.157476 |
| H  | -2.283799 | 4.116533  | -1.377335 | 0.160044 |
| H  | -0.522080 | 3.728509  | 0.317688  | 0.171904 |
| H  | 1.611818  | -2.487297 | -2.091505 | 0.166926 |
| H  | 0.392972  | -3.681492 | -1.614504 | 0.190984 |
| H  | -0.023087 | -1.957594 | -1.656724 | 0.195853 |
| H  | -0.356471 | -1.449775 | 2.159974  | 0.206851 |
| H  | -2.060714 | 0.830780  | -0.716336 | 0.188631 |
| H  | -3.855672 | -0.911064 | -1.806918 | 0.169557 |
| H  | -4.111131 | -3.933942 | 0.436758  | 0.193854 |
| H  | -4.406433 | -3.609658 | -1.281887 | 0.191475 |
| H  | -2.923786 | -4.439899 | -0.772896 | 0.180618 |
| XX | -0.456458 | 2.512548  | -1.822349 | 0.000000 |

#### 14(E)-a2β

B3LYP/6-31G(d) energy=-1114.3243655000

Zero-point correction (ZPC)=0.453035

Number of Imaginary Frequencies=0

|   |           |           |           |           |
|---|-----------|-----------|-----------|-----------|
| C | 0.859839  | -1.858896 | -1.926754 | -0.486407 |
| C | 0.900087  | -2.325222 | -0.606004 | 0.341919  |
| C | 2.145045  | -2.634726 | -0.035769 | -0.177328 |
| C | 3.320490  | -2.471350 | -0.771372 | -0.217194 |
| C | 3.267846  | -2.002436 | -2.086827 | 0.360530  |
| C | 2.034003  | -1.696994 | -2.663923 | 0.070990  |
| C | -0.382226 | -2.557257 | 0.164350  | -0.456799 |
| C | -0.826715 | -1.465015 | 1.172480  | 0.633011  |
| C | 0.218260  | -1.227985 | 2.261409  | -0.082747 |
| N | 0.543071  | 0.096243  | 2.267141  | -0.459041 |
| C | -0.089613 | 0.902923  | 1.244135  | -0.378287 |
| N | -1.087989 | -0.095606 | 0.651808  | 0.153221  |
| C | 0.877872  | 1.518546  | 0.289165  | -0.194763 |
| O | 0.645135  | 2.843896  | -0.011882 | -0.139196 |
| C | 1.660522  | 3.262836  | -0.831050 | -0.130808 |
| C | 2.526561  | 2.227383  | -1.043329 | -0.124550 |
| C | 2.027261  | 1.102750  | -0.318053 | -0.182668 |
| C | 1.619945  | 4.679363  | -1.283592 | -0.492557 |
| C | 1.483915  | 0.677007  | 3.216456  | -0.338765 |
| O | 0.657566  | -2.096250 | 2.988970  | 0.423051  |
| C | -2.141701 | 0.257843  | -0.055161 | -0.174190 |
| C | -2.384363 | 1.709878  | -0.386288 | -0.053362 |
| C | -3.351897 | 2.374734  | 0.622144  | -0.513848 |
| C | -3.119244 | -0.745373 | -0.435867 | -0.533300 |
| C | -4.175768 | -0.520019 | -1.250965 | -0.393554 |
| C | -5.193916 | -1.546841 | -1.605767 | -0.458822 |
| H | -1.736271 | -1.812984 | 1.673834  | 0.213254  |
| H | 2.347311  | 1.100738  | 2.696210  | 0.192853  |
| H | 1.809296  | -0.128358 | 3.876082  | 0.224760  |
| H | 0.996193  | 1.459876  | 3.807826  | 0.180817  |
| H | -5.223998 | -1.687931 | -2.694633 | 0.209495  |

|    |           |           |           |          |
|----|-----------|-----------|-----------|----------|
| H  | -6.195263 | -1.197629 | -1.319611 | 0.209697 |
| H  | -5.005463 | -2.511329 | -1.127619 | 0.189929 |
| H  | -4.320244 | 0.459607  | -1.702047 | 0.183595 |
| H  | -3.007896 | -1.742644 | -0.027354 | 0.178452 |
| H  | -1.447805 | 2.263558  | -0.420630 | 0.222635 |
| H  | -2.810351 | 1.770216  | -1.390860 | 0.190647 |
| H  | -0.284525 | -3.453876 | 0.787251  | 0.211565 |
| H  | -1.199535 | -2.749231 | -0.537195 | 0.166901 |
| H  | -0.099263 | -1.643044 | -2.393345 | 0.121203 |
| H  | 1.983618  | -1.346424 | -3.690838 | 0.150644 |
| H  | 4.182000  | -1.891029 | -2.662837 | 0.156571 |
| H  | 4.275603  | -2.728490 | -0.322221 | 0.159293 |
| H  | 2.190781  | -3.017611 | 0.980057  | 0.171705 |
| H  | -2.950718 | 2.361877  | 1.640827  | 0.174311 |
| H  | -3.503676 | 3.419009  | 0.335809  | 0.198319 |
| H  | -4.324726 | 1.875851  | 0.637217  | 0.174868 |
| H  | -0.677083 | 1.710842  | 1.697228  | 0.202512 |
| H  | 2.472786  | 0.120316  | -0.256176 | 0.187060 |
| H  | 3.426289  | 2.264415  | -1.641248 | 0.169411 |
| H  | 1.636548  | 5.370410  | -0.432762 | 0.192123 |
| H  | 2.487285  | 4.890697  | -1.913505 | 0.191774 |
| H  | 0.714717  | 4.890664  | -1.865319 | 0.181141 |
| XX | 2.088282  | -2.169171 | -1.329772 | 0.000000 |

#### 14(E)-b1α

B3LYP/6-31G(d) energy=-1114.32632820

Zero-point correction (ZPC)=0.452661

Number of Imaginary Frequencies=0

|   |           |           |           |           |
|---|-----------|-----------|-----------|-----------|
| O | -2.223655 | -0.771909 | -0.885074 | -0.485270 |
| C | -2.449080 | -0.497206 | 0.438712  | 0.381931  |
| C | -3.353283 | -1.382413 | 0.950074  | -0.198814 |
| C | -3.704979 | -2.262599 | -0.121019 | -0.214112 |
| C | -2.998176 | -1.857467 | -1.217327 | 0.363797  |
| C | -1.787859 | 0.702332  | 1.025452  | 0.030025  |
| N | -2.143584 | 1.963331  | 0.401863  | -0.439393 |
| C | -1.118755 | 2.607290  | -0.229226 | 0.622210  |
| C | 0.130355  | 1.730549  | -0.109328 | -0.092340 |
| N | -0.276573 | 0.716916  | 0.901594  | -0.446322 |
| C | 0.470891  | 1.177820  | -1.523888 | -0.380845 |
| C | 1.755216  | 0.392719  | -1.647375 | 0.153149  |
| C | 1.743816  | -1.008450 | -1.625090 | -0.191003 |
| C | 2.933223  | -1.733075 | -1.725013 | -0.129740 |
| C | 4.151716  | -1.063563 | -1.849760 | -0.130475 |
| C | 4.174603  | 0.333621  | -1.886712 | -0.130467 |
| C | 2.984248  | 1.055534  | -1.789461 | -0.197191 |
| O | -1.168543 | 3.660751  | -0.828823 | -0.479310 |
| C | -3.508779 | 2.466924  | 0.430505  | -0.339729 |
| C | 0.531198  | 0.041258  | 1.698942  | 0.419434  |
| C | 1.962934  | 0.244147  | 1.616774  | -0.159169 |
| C | 2.859942  | -0.276247 | 2.486781  | -0.061658 |
| C | 4.328565  | -0.042971 | 2.404493  | -0.511456 |
| C | -2.916846 | -2.335319 | -2.623358 | -0.536412 |
| C | -0.025564 | -0.967463 | 2.676351  | -0.363667 |
| C | 0.110077  | -2.414852 | 2.147292  | -0.457053 |
| H | 0.951661  | 2.330529  | 0.285929  | 0.210690  |
| H | -4.191579 | 1.770352  | -0.065898 | 0.190605  |
| H | -3.508385 | 3.419433  | -0.101063 | 0.227066  |
| H | -3.841379 | 2.625761  | 1.462592  | 0.178800  |
| H | 4.859136  | -1.003464 | 2.361862  | 0.203158  |
| H | 4.683607  | 0.458480  | 3.315316  | 0.204911  |
| H | 4.608293  | 0.554497  | 1.533641  | 0.191895  |
| H | 2.529941  | -0.902511 | 3.312985  | 0.177402  |
| H | 2.344745  | 0.846295  | 0.802937  | 0.188748  |
| H | 0.514516  | -0.868190 | 3.621242  | 0.195092  |

|   |           |           |           |          |
|---|-----------|-----------|-----------|----------|
| H | -1.072529 | -0.769196 | 2.901471  | 0.182517 |
| H | -0.379568 | 0.581314  | -1.865831 | 0.191328 |
| H | 0.510401  | 2.074084  | -2.153675 | 0.213011 |
| H | 3.007516  | 2.142257  | -1.843973 | 0.149502 |
| H | 5.116621  | 0.860054  | -2.012306 | 0.159239 |
| H | 5.076761  | -1.625889 | -1.938177 | 0.157739 |
| H | 2.907170  | -2.819245 | -1.718835 | 0.151051 |
| H | 0.794650  | -1.534068 | -1.546169 | 0.133459 |
| H | 1.155292  | -2.679586 | 1.968182  | 0.174987 |
| H | -0.299840 | -3.105208 | 2.889945  | 0.191695 |
| H | -0.446783 | -2.548041 | 1.216264  | 0.185731 |
| H | -2.047759 | 0.735594  | 2.089370  | 0.195363 |
| H | -3.736715 | -1.403332 | 1.961875  | 0.170030 |
| H | -4.401743 | -3.087968 | -0.082810 | 0.175515 |
| H | -1.898527 | -2.646139 | -2.885642 | 0.184866 |
| H | -3.581567 | -3.191321 | -2.761539 | 0.193825 |
| H | -3.216040 | -1.550375 | -3.327630 | 0.195825 |

#### 14(E)-b2a

B3LYP/6-31G(d) energy=-1114.32764380

Zero-point correction (ZPC)= 0.452854

Number of Imaginary Frequencies=0

|   |           |           |            |           |
|---|-----------|-----------|------------|-----------|
| O | 2.173814  | -1.230009 | -0.565420  | -0.482490 |
| C | 2.405582  | 0.114173  | -0.696201  | 0.380866  |
| C | 3.292336  | 0.335493  | -1.711059  | -0.197513 |
| C | 3.623774  | -0.948868 | -2.244481  | -0.212657 |
| C | 2.923910  | -1.872090 | -1.521336  | 0.365017  |
| C | 1.776345  | 1.037955  | 0.291967   | 0.030115  |
| N | 2.148296  | 0.800947  | 1.674882   | -0.436378 |
| C | 1.136521  | 0.348386  | 2.473557   | 0.623430  |
| C | -0.126562 | 0.235154  | 1.614404   | -0.092814 |
| N | 0.265329  | 0.947801  | 0.370272   | -0.443069 |
| C | -0.482759 | -1.270639 | 1.458856   | -0.381279 |
| C | -1.769570 | -1.580412 | 0.731057   | 0.153580  |
| C | -1.759976 | -1.898657 | -0.633985  | -0.190627 |
| C | -2.949792 | -2.175320 | -1.309773  | -0.129615 |
| C | -4.166770 | -2.138798 | -0.626667  | -0.130900 |
| C | -4.187911 | -1.834070 | 0.737323   | -0.131038 |
| C | -2.996925 | -1.558931 | 1.411066   | -0.196862 |
| O | 1.204615  | 0.042342  | 3.645354   | -0.478808 |
| C | 3.523323  | 0.944862  | 2.129506   | -0.339553 |
| C | -0.542882 | 1.572512  | -0.466438  | 0.420732  |
| C | -1.972696 | 1.545622  | -0.251676  | -0.157703 |
| C | -2.871363 | 2.198740  | -0.1025459 | -0.060351 |
| C | -4.340632 | 2.189478  | -0.784268  | -0.511136 |
| C | 2.826966  | -3.355364 | -1.565553  | -0.536833 |
| C | 0.044530  | 2.367029  | -1.610539  | -0.379021 |
| C | 0.263599  | 3.854885  | -1.250975  | -0.461794 |
| H | -0.938724 | 0.778079  | 2.101250   | 0.209850  |
| H | 4.185876  | 0.253394  | 1.599155   | 0.190635  |
| H | 3.533511  | 0.713376  | 3.195465   | 0.226921  |
| H | 3.874454  | 1.971289  | 1.975989   | 0.177758  |
| H | -4.865814 | 1.835554  | -1.681266  | 0.204197  |
| H | -4.701171 | 3.211987  | -0.606013  | 0.204091  |
| H | -4.620801 | 1.558303  | 0.062202   | 0.192262  |
| H | -2.539886 | 2.776839  | -1.885675  | 0.177360  |
| H | -2.352251 | 0.957688  | 0.574260   | 0.185882  |
| H | 0.361769  | -1.769363 | 0.976183   | 0.193185  |
| H | -0.528498 | -1.638414 | 2.490283   | 0.211229  |
| H | -3.018098 | -1.346985 | 2.478282   | 0.148699  |
| H | -5.128865 | -1.830451 | 1.280367   | 0.158550  |
| H | -5.092156 | -2.365344 | -1.148384  | 0.157049  |
| H | -2.925490 | -2.432152 | -2.365206  | 0.151156  |
| H | -0.811647 | -1.944101 | -1.165037  | 0.133792  |

|   |           |           |           |          |
|---|-----------|-----------|-----------|----------|
| H | 0.955750  | 3.980668  | -0.411807 | 0.174028 |
| H | 0.683582  | 4.377130  | -2.115142 | 0.197499 |
| H | -0.677201 | 4.341842  | -0.979964 | 0.179118 |
| H | 2.048416  | 2.058416  | 0.004358  | 0.192192 |
| H | 3.678993  | 1.293712  | -2.033129 | 0.170425 |
| H | 4.302215  | -1.160034 | -3.058842 | 0.175836 |
| H | 3.480006  | -3.745034 | -2.349990 | 0.193839 |
| H | 3.130209  | -3.802137 | -0.611594 | 0.195297 |
| H | 1.802906  | -3.685891 | -1.776481 | 0.186522 |
| H | -0.633748 | 2.295724  | -2.463499 | 0.195562 |
| H | 0.979579  | 1.909156  | -1.937276 | 0.193674 |

#### 14(E)-b1b

B3LYP/6-31G(d) energy=-1114.32468830

Zero-point correction (ZPC)= 0.452709

Number of Imaginary Frequencies=0

|   |           |           |           |           |
|---|-----------|-----------|-----------|-----------|
| O | -2.853529 | -1.330871 | 0.053054  | -0.486602 |
| C | -2.448377 | -0.044956 | -0.201352 | 0.377394  |
| C | -2.844524 | 0.328307  | -1.453587 | -0.203299 |
| C | -3.528732 | -0.797513 | -2.009420 | -0.208275 |
| C | -3.514290 | -1.782675 | -1.063749 | 0.360274  |
| C | -1.743602 | 0.658605  | 0.913340  | 0.035692  |
| N | -1.876375 | 2.096948  | 0.846821  | -0.449374 |
| C | -0.728794 | 2.760384  | 0.511216  | 0.620508  |
| C | 0.380647  | 1.718639  | 0.334106  | -0.098513 |
| N | -0.229885 | 0.493370  | 0.913777  | -0.439159 |
| C | 0.767070  | 1.625687  | -1.169009 | -0.372867 |
| C | 1.984036  | 0.787653  | -1.486121 | 0.153949  |
| C | 1.850028  | -0.529059 | -1.946489 | -0.189184 |
| C | 2.977652  | -1.306465 | -2.218610 | -0.128473 |
| C | 4.254911  | -0.775225 | -2.033232 | -0.129789 |
| C | 4.400699  | 0.541020  | -1.585774 | -0.130142 |
| C | 3.272663  | 1.317623  | -1.317941 | -0.197271 |
| O | -0.590332 | 3.954066  | 0.347777  | -0.476782 |
| C | -3.142310 | 2.767495  | 1.114612  | -0.339750 |
| C | 0.416227  | -0.497440 | 1.500038  | 0.413020  |
| C | 1.863574  | -0.460048 | 1.586821  | -0.162670 |
| C | 2.600460  | -1.295811 | 2.354582  | -0.061248 |
| C | 4.084681  | -1.232753 | 2.463714  | -0.511543 |
| C | -4.059895 | -3.165294 | -1.009662 | -0.535634 |
| C | -0.331600 | -1.687620 | 2.054627  | -0.369891 |
| C | -0.152165 | -2.944531 | 1.171829  | -0.454277 |
| H | 1.238229  | 2.021994  | 0.936440  | 0.213337  |
| H | -3.915003 | 2.438540  | 0.413864  | 0.189455  |
| H | -2.968230 | 3.837465  | 0.992360  | 0.227065  |
| H | -3.473744 | 2.566614  | 2.139575  | 0.182762  |
| H | 4.521470  | -2.207197 | 2.207498  | 0.202924  |
| H | 4.380666  | -1.032192 | 3.502491  | 0.204947  |
| H | 4.518604  | -0.468894 | 1.814058  | 0.191216  |
| H | 2.116920  | -2.066587 | 2.951476  | 0.177476  |
| H | 2.390062  | 0.284883  | 1.004315  | 0.189812  |
| H | 0.040914  | -1.887773 | 3.063825  | 0.195366  |
| H | -1.396638 | -1.485270 | 2.148930  | 0.196864  |
| H | -0.102198 | 1.262901  | -1.726100 | 0.173421  |
| H | 0.931642  | 2.666717  | -1.470643 | 0.213941  |
| H | 3.393583  | 2.349425  | -0.993438 | 0.149633  |
| H | 5.391876  | 0.969244  | -1.465715 | 0.159649  |
| H | 5.132671  | -1.375649 | -2.253940 | 0.158445  |
| H | 2.858341  | -2.321449 | -2.587158 | 0.152687  |
| H | 0.857033  | -0.941783 | -2.111489 | 0.135415  |
| H | 0.896991  | -3.237869 | 1.089158  | 0.172884  |
| H | -0.710245 | -3.772418 | 1.618137  | 0.190053  |
| H | -0.544648 | -2.773216 | 0.166505  | 0.180121  |
| H | -2.118480 | 0.288990  | 1.872875  | 0.205185  |

|   |           |           |           |          |
|---|-----------|-----------|-----------|----------|
| H | -2.691296 | 1.291801  | -1.920207 | 0.177471 |
| H | -3.987724 | -0.860173 | -2.985984 | 0.175586 |
| H | -4.776249 | -3.278731 | -0.187656 | 0.193042 |
| H | -4.573978 | -3.395769 | -1.945771 | 0.194227 |
| H | -3.266009 | -3.907520 | -0.863827 | 0.181345 |

**14(E)-b2δ**

B3LYP/6-31G(d) energy=-1114.32644170

Zero-point correction (ZPC)= 0.452947

Number of Imaginary Frequencies=0

|   |           |           |           |           |
|---|-----------|-----------|-----------|-----------|
| O | -2.703519 | -1.396653 | -0.551159 | -0.485724 |
| C | -2.401603 | -0.063628 | -0.432080 | 0.380419  |
| C | -2.789035 | 0.602079  | -1.559367 | -0.202295 |
| C | -3.358435 | -0.380136 | -2.429293 | -0.214299 |
| C | -3.287739 | -1.579848 | -1.781209 | 0.365656  |
| C | -1.779077 | 0.360720  | 0.859952  | 0.032090  |
| N | -1.940681 | 1.772412  | 1.127417  | -0.445647 |
| C | -0.800644 | 2.510809  | 0.958502  | 0.620209  |
| C | 0.336258  | 1.547048  | 0.591877  | -0.098273 |
| N | -0.266027 | 0.221775  | 0.889007  | -0.435178 |
| C | 0.771443  | 1.786815  | -0.880797 | -0.373101 |
| C | 2.024127  | 1.066558  | -1.322862 | 0.153820  |
| C | 1.947653  | -0.110385 | -2.079257 | -0.186912 |
| C | 3.107609  | -0.778913 | -2.475719 | -0.128608 |
| C | 4.360699  | -0.277611 | -2.119435 | -0.130541 |
| C | 4.449510  | 0.901000  | -1.373184 | -0.130856 |
| C | 3.288948  | 1.569573  | -0.980954 | -0.197464 |
| O | -0.683663 | 3.713826  | 1.054964  | -0.476186 |
| C | -3.228345 | 2.353506  | 1.485257  | -0.339809 |
| C | 0.367603  | -0.861245 | 1.298261  | 0.412415  |
| C | 1.812600  | -0.863348 | 1.377620  | -0.161687 |
| C | 2.546706  | -1.888540 | 1.870268  | -0.060457 |
| C | 4.032471  | -1.875732 | 1.970092  | -0.511948 |
| C | -3.709559 | -2.963684 | -2.125499 | -0.534075 |
| C | -0.424607 | -2.072770 | 1.738127  | -0.392008 |
| C | -0.732363 | -2.058709 | 3.253829  | -0.460713 |
| H | 1.171392  | 1.725812  | 1.271472  | 0.212680  |
| H | -3.969214 | 2.178514  | 0.699729  | 0.188933  |
| H | -3.071258 | 3.426091  | 1.607900  | 0.226959  |
| H | -3.592790 | 1.928586  | 2.427125  | 0.181924  |
| H | 4.451561  | -2.745184 | 1.446429  | 0.203664  |
| H | 4.341940  | -1.976528 | 3.019521  | 0.204355  |
| H | 4.470795  | -0.965827 | 1.553523  | 0.192454  |
| H | 2.058264  | -2.792719 | 2.228118  | 0.178086  |
| H | 2.342910  | 0.005682  | 1.008983  | 0.187714  |
| H | -1.346154 | -2.152350 | 1.160648  | 0.217490  |
| H | 0.153977  | -2.966166 | 1.494234  | 0.192016  |
| H | -0.066519 | 1.533266  | -1.536644 | 0.175029  |
| H | 0.914652  | 2.871958  | -0.945801 | 0.212950  |
| H | 3.366792  | 2.500592  | -0.422674 | 0.148907  |
| H | 5.422002  | 1.311089  | -1.115574 | 0.159063  |
| H | 5.263964  | -0.790635 | -2.436689 | 0.157917  |
| H | 3.032424  | -1.683160 | -3.073162 | 0.152975  |
| H | 0.974524  | -0.496983 | -2.374516 | 0.136382  |
| H | -1.344203 | -1.197803 | 3.542813  | 0.172830  |
| H | -1.283284 | -2.965815 | 3.517561  | 0.197988  |
| H | 0.184656  | -2.028804 | 3.848978  | 0.176963  |
| H | -2.188001 | -0.234525 | 1.681136  | 0.201521  |
| H | -2.701989 | 1.663617  | -1.746431 | 0.177786  |
| H | -3.781270 | -0.211295 | -3.409559 | 0.176021  |
| H | -4.442783 | -3.347491 | -1.406511 | 0.192204  |
| H | -4.165873 | -2.974213 | -3.118116 | 0.194026  |
| H | -2.857409 | -3.653750 | -2.132686 | 0.182677  |

**14(E)-c1α**

B3LYP/6-31G(d) energy=-1114.3256856000

Zero-point correction (ZPC)= 0.452729

Number of Imaginary Frequencies=0

|   |           |           |           |           |
|---|-----------|-----------|-----------|-----------|
| O | -2.331836 | -0.704797 | 1.075773  | -0.485611 |
| C | -2.781978 | -0.120490 | -0.079240 | 0.381480  |
| C | -4.063263 | 0.318570  | 0.085791  | -0.197509 |
| C | -4.428158 | -0.010504 | 1.429375  | -0.214961 |
| C | -3.349549 | -0.630181 | 1.994964  | 0.363353  |
| C | -1.860095 | -0.146089 | -1.248497 | 0.023123  |
| N | -1.491588 | -1.478514 | -1.693408 | -0.437058 |
| C | -0.194973 | -1.827913 | -1.449525 | 0.613605  |
| C | 0.521676  | -0.616186 | -0.857467 | -0.079064 |
| N | -0.504632 | 0.455400  | -0.953755 | -0.450349 |
| C | 1.039277  | -0.892863 | 0.592453  | -0.366788 |
| C | 2.551286  | -0.978875 | 0.673738  | 0.141468  |
| C | 3.265687  | -0.131402 | 1.530910  | -0.201247 |
| C | 4.658050  | -0.213377 | 1.615804  | -0.129849 |
| C | 5.350310  | -1.142292 | 0.838773  | -0.125038 |
| C | 4.645210  | -1.992456 | -0.017161 | -0.128878 |
| C | 3.255117  | -1.915198 | -0.099134 | -0.193729 |
| O | 0.322555  | -2.908996 | -1.648401 | -0.479862 |
| C | -2.488238 | -2.411876 | -2.198920 | -0.340433 |
| C | -0.250622 | 1.744753  | -0.861984 | 0.420622  |
| C | 1.112266  | 2.171532  | -0.611880 | -0.181927 |
| C | 1.527414  | 3.460009  | -0.640453 | -0.057646 |
| C | 2.934077  | 3.884003  | -0.399312 | -0.516782 |
| C | -3.084871 | -1.211968 | 3.337818  | -0.533929 |
| C | -1.360073 | 2.761294  | -0.977416 | -0.364262 |
| C | -1.795036 | 3.316508  | 0.399176  | -0.459593 |
| H | 1.354972  | -0.358795 | -1.515692 | 0.223545  |
| H | -3.255530 | -2.613183 | -1.444468 | 0.191241  |
| H | -1.964949 | -3.337498 | -2.442056 | 0.226835  |
| H | -2.963675 | -2.013213 | -3.101617 | 0.180125  |
| H | 2.972126  | 4.618339  | 0.416550  | 0.204903  |
| H | 3.328228  | 4.399252  | -1.286097 | 0.209247  |
| H | 3.588707  | 3.043406  | -0.156266 | 0.198059  |
| H | 0.822715  | 4.260502  | -0.858127 | 0.180957  |
| H | 1.853558  | 1.411199  | -0.391924 | 0.198132  |
| H | -1.007141 | 3.580857  | -1.610090 | 0.196602  |
| H | -2.227196 | 2.336554  | -1.483129 | 0.184059  |
| H | 0.668534  | -0.106843 | 1.257409  | 0.166139  |
| H | 0.587475  | -1.827737 | 0.940531  | 0.209392  |
| H | 2.708924  | -2.589065 | -0.755279 | 0.175324  |
| H | 5.178262  | -2.724645 | -0.616887 | 0.157309  |
| H | 6.432351  | -1.209411 | 0.904127  | 0.155435  |
| H | 5.197382  | 0.442585  | 2.293484  | 0.148693  |
| H | 2.729920  | 0.584183  | 2.152010  | 0.126219  |
| H | -0.964550 | 3.804259  | 0.916095  | 0.171633  |
| H | -2.588122 | 4.054770  | 0.250595  | 0.193436  |
| H | -2.186493 | 2.523349  | 1.041042  | 0.189359  |
| H | -2.325903 | 0.406599  | -2.071766 | 0.196649  |
| H | -4.681018 | 0.807530  | -0.656091 | 0.170135  |
| H | -5.376226 | 0.182009  | 1.911305  | 0.175134  |
| H | -2.237252 | -0.719428 | 3.828753  | 0.184084  |
| H | -3.965645 | -1.092350 | 3.973066  | 0.193023  |
| H | -2.852756 | -2.281097 | 3.268810  | 0.195256  |

**14(E)-c2α**

B3LYP/6-31G(d) energy=-1114.3267550000

Zero-point correction (ZPC)= 0.45269

Number of Imaginary Frequencies=0

|   |           |           |          |           |
|---|-----------|-----------|----------|-----------|
| O | -2.258049 | -1.061053 | 1.060616 | -0.482186 |
| C | -2.769934 | -0.138909 | 0.186379 | 0.380859  |

|   |           |           |           |           |
|---|-----------|-----------|-----------|-----------|
| C | -4.029974 | 0.220910  | 0.570022  | -0.195876 |
| C | -4.313107 | -0.521548 | 1.758934  | -0.213442 |
| C | -3.212161 | -1.286519 | 2.022442  | 0.364420  |
| C | -1.930060 | 0.210591  | -0.994876 | 0.021045  |
| N | -1.602780 | -0.915674 | -1.851573 | -0.433044 |
| C | -0.307790 | -1.341675 | -1.760203 | 0.614161  |
| C | 0.456743  | -0.358775 | -0.873693 | -0.079449 |
| N | -0.551468 | 0.701913  | -0.619213 | -0.445348 |
| C | 1.030427  | -1.039026 | 0.412240  | -0.365365 |
| C | 2.541495  | -1.164507 | 0.387565  | 0.141292  |
| C | 3.318378  | -0.585031 | 1.399484  | -0.201728 |
| C | 4.710552  | -0.704329 | 1.385024  | -0.129711 |
| C | 5.339687  | -1.401539 | 0.353559  | -0.124841 |
| C | 4.572121  | -1.983626 | -0.658689 | -0.128879 |
| C | 3.182275  | -1.869351 | -0.643055 | -0.193803 |
| O | 0.176331  | -2.326685 | -2.280657 | -0.479401 |
| C | -2.637766 | -1.660995 | -2.553934 | -0.340685 |
| C | -0.278515 | 1.918584  | -0.195395 | 0.418782  |
| C | 1.092133  | 2.260134  | 0.122757  | -0.181947 |
| C | 1.500557  | 3.490264  | 0.514994  | -0.057423 |
| C | 2.915033  | 3.838310  | 0.821366  | -0.516518 |
| C | -2.870847 | -2.264023 | 3.089743  | -0.534229 |
| C | -1.384934 | 2.940826  | -0.096750 | -0.375299 |
| C | -1.557894 | 3.745848  | -1.405831 | -0.461524 |
| H | 1.267775  | 0.070596  | -1.466978 | 0.222675  |
| H | -3.367909 | -2.076601 | -1.851834 | 0.190893  |
| H | -2.141900 | -2.473808 | -3.086071 | 0.226650  |
| H | -3.153332 | -1.014821 | -3.272335 | 0.179589  |
| H | 2.990229  | 4.251842  | 1.836046  | 0.205905  |
| H | 3.261021  | 4.633352  | 0.146390  | 0.208895  |
| H | 3.586020  | 2.980361  | 0.732484  | 0.197987  |
| H | 0.780391  | 4.299565  | 0.620739  | 0.181251  |
| H | 1.843769  | 1.481843  | 0.042854  | 0.196551  |
| H | 0.713521  | -0.462991 | 1.286936  | 0.166871  |
| H | 0.567221  | -2.026341 | 0.509830  | 0.208119  |
| H | 2.587491  | -2.334755 | -1.425616 | 0.175440  |
| H | 5.056368  | -2.535867 | -1.458989 | 0.156947  |
| H | 6.421469  | -1.497559 | 0.341021  | 0.155084  |
| H | 5.299228  | -0.259666 | 2.182622  | 0.148275  |
| H | 2.831900  | -0.055208 | 2.216474  | 0.126183  |
| H | -1.811744 | 3.102625  | -2.254731 | 0.174034  |
| H | -2.365738 | 4.471902  | -1.279100 | 0.198656  |
| H | -0.644987 | 4.290774  | -1.662407 | 0.179307  |
| H | -2.444293 | 0.987955  | -1.568738 | 0.193503  |
| H | -4.686381 | 0.916644  | 0.063698  | 0.170504  |
| H | -5.223465 | -0.495023 | 2.340816  | 0.175334  |
| H | -3.711131 | -2.365828 | 3.780490  | 0.193069  |
| H | -2.649465 | -3.251422 | 2.668291  | 0.194650  |
| H | -1.992596 | -1.942416 | 3.661959  | 0.185323  |
| H | -1.159041 | 3.623960  | 0.724707  | 0.193668  |
| H | -2.319450 | 2.445433  | 0.174785  | 0.194929  |

#### 14(E)-c1β

B3LYP/6-31G(d) energy=-1114.3240994000

Zero-point correction (ZPC)= 0.452691

Number of Imaginary Frequencies=0

|   |           |           |           |           |
|---|-----------|-----------|-----------|-----------|
| O | -3.758813 | 0.097229  | -0.031525 | -0.484914 |
| C | -2.593551 | -0.588738 | 0.204062  | 0.368382  |
| C | -2.583983 | -1.063207 | 1.484493  | -0.202376 |
| C | -3.814187 | -0.641203 | 2.076366  | -0.205768 |
| C | -4.500356 | 0.056339  | 1.121081  | 0.356959  |
| C | -1.651886 | -0.688405 | -0.950969 | 0.053855  |
| N | -1.127834 | -2.022146 | -1.161346 | -0.451865 |
| C | 0.216747  | -2.158907 | -0.968997 | 0.609944  |

|   |           |           |           |           |
|---|-----------|-----------|-----------|-----------|
| C | 0.787714  | -0.790816 | -0.603099 | -0.081888 |
| N | -0.374246 | 0.115513  | -0.792563 | -0.457607 |
| C | 1.395648  | -0.775498 | 0.838248  | -0.374399 |
| C | 2.909214  | -0.669816 | 0.844984  | 0.143459  |
| C | 3.543327  | 0.378129  | 1.525263  | -0.200356 |
| C | 4.937049  | 0.475231  | 1.541382  | -0.129695 |
| C | 5.709605  | -0.474053 | 0.872148  | -0.124394 |
| C | 5.084505  | -1.523141 | 0.192906  | -0.129114 |
| C | 3.693555  | -1.624359 | 0.179700  | -0.193546 |
| O | 0.866428  | -3.182732 | -1.045805 | -0.478842 |
| C | -2.000215 | -3.132082 | -1.521643 | -0.340083 |
| C | -0.290067 | 1.426410  | -0.894815 | 0.416309  |
| C | 1.012902  | 2.053898  | -0.789227 | -0.182233 |
| C | 1.246578  | 3.369186  | -1.009873 | -0.056764 |
| C | 2.591813  | 4.000528  | -0.919507 | -0.516790 |
| C | -5.830552 | 0.721595  | 1.090521  | -0.533882 |
| C | -1.531770 | 2.265153  | -1.071065 | -0.373725 |
| C | -1.971529 | 2.930972  | 0.254489  | -0.459917 |
| H | 1.553078  | -0.535075 | -1.339884 | 0.225781  |
| H | -2.755686 | -3.297645 | -0.747897 | 0.191712  |
| H | -1.369718 | -4.017321 | -1.614407 | 0.226836  |
| H | -2.496561 | -2.935176 | -2.478314 | 0.183281  |
| H | 2.568909  | 4.835756  | -0.206604 | 0.205141  |
| H | 2.866875  | 4.439660  | -1.888350 | 0.209343  |
| H | 3.367386  | 3.292464  | -0.617029 | 0.197421  |
| H | 0.428609  | 4.034211  | -1.280085 | 0.181394  |
| H | 1.861204  | 1.432066  | -0.524891 | 0.196455  |
| H | -1.323920 | 3.035276  | -1.819394 | 0.194878  |
| H | -2.358377 | 1.670278  | -1.458849 | 0.200426  |
| H | 0.959538  | 0.058104  | 1.398262  | 0.167627  |
| H | 1.083507  | -1.693733 | 1.349301  | 0.204032  |
| H | 3.211105  | -2.450140 | -0.338008 | 0.176000  |
| H | 5.681831  | -2.270408 | -0.321520 | 0.158120  |
| H | 6.793216  | -0.402057 | 0.884809  | 0.156343  |
| H | 5.415738  | 1.286754  | 2.082313  | 0.149814  |
| H | 2.946187  | 1.112150  | 2.063157  | 0.127833  |
| H | -1.200656 | 3.601213  | 0.643653  | 0.170890  |
| H | -2.876924 | 3.516836  | 0.073442  | 0.191913  |
| H | -2.195767 | 2.183669  | 1.020210  | 0.187652  |
| H | -2.166899 | -0.333001 | -1.851385 | 0.208670  |
| H | -1.806983 | -1.654145 | 1.950564  | 0.172304  |
| H | -4.154277 | -0.844608 | 3.082034  | 0.174912  |
| H | -6.484845 | 0.267305  | 0.337327  | 0.195292  |
| H | -6.313842 | 0.626490  | 2.065754  | 0.193092  |
| H | -5.742455 | 1.788246  | 0.853105  | 0.181830  |

#### 14(E)-c2δ

B3LYP/6-31G(d) energy=-1114.3252398000

Zero-point correction (ZPC)= 0.45267

Number of Imaginary Frequencies=0

|   |           |           |           |           |
|---|-----------|-----------|-----------|-----------|
| O | -3.507487 | 0.269511  | 0.605030  | -0.484599 |
| C | -2.546838 | -0.664203 | 0.305936  | 0.377229  |
| C | -2.535577 | -1.641055 | 1.259961  | -0.200142 |
| C | -3.547451 | -1.288561 | 2.205681  | -0.209816 |
| C | -4.114444 | -0.123671 | 1.772444  | 0.363545  |
| C | -1.757760 | -0.432555 | -0.941877 | 0.033392  |
| N | -1.277867 | -1.660159 | -1.538815 | -0.443067 |
| C | 0.057000  | -1.894758 | -1.352271 | 0.607489  |
| C | 0.667856  | -0.665727 | -0.676514 | -0.084178 |
| N | -0.453935 | 0.304926  | -0.698489 | -0.442880 |
| C | 1.244219  | -0.981163 | 0.742679  | -0.370020 |
| C | 2.756954  | -0.886233 | 0.798627  | 0.141494  |
| C | 3.384491  | -0.006397 | 1.690019  | -0.200100 |
| C | 4.778505  | 0.075424  | 1.744670  | -0.130207 |

|   |           |           |           |           |
|---|-----------|-----------|-----------|-----------|
| C | 5.557445  | -0.719901 | 0.903929  | -0.124771 |
| C | 4.938846  | -1.601373 | 0.013368  | -0.128655 |
| C | 3.548015  | -1.687504 | -0.039126 | -0.193194 |
| O | 0.673697  | -2.895135 | -1.658314 | -0.477674 |
| C | -2.181615 | -2.623560 | -2.154946 | -0.339827 |
| C | -0.327307 | 1.612506  | -0.606103 | 0.411185  |
| C | 0.984640  | 2.170501  | -0.349154 | -0.181602 |
| C | 1.255561  | 3.496228  | -0.299746 | -0.057154 |
| C | 2.610839  | 4.058646  | -0.048155 | -0.516511 |
| C | -5.211347 | 0.740458  | 2.283783  | -0.533932 |
| C | -1.528088 | 2.503662  | -0.819615 | -0.389310 |
| C | -1.694860 | 2.904372  | -2.304394 | -0.460209 |
| H | 1.460757  | -0.290883 | -1.327836 | 0.224710  |
| H | -2.925616 | -2.978288 | -1.435630 | 0.190358  |
| H | -1.572108 | -3.462182 | -2.494342 | 0.226455  |
| H | -2.692216 | -2.172570 | -3.012563 | 0.182891  |
| H | 2.582291  | 4.740268  | 0.812531  | 0.205283  |
| H | 2.929817  | 4.668777  | -0.904514 | 0.208433  |
| H | 3.358948  | 3.282848  | 0.133010  | 0.197317  |
| H | 0.461210  | 4.224573  | -0.451985 | 0.181423  |
| H | 1.807107  | 1.483196  | -0.180068 | 0.195148  |
| H | 0.793496  | -0.296523 | 1.467939  | 0.171266  |
| H | 0.924796  | -1.990571 | 1.025672  | 0.202680  |
| H | 3.070089  | -2.384684 | -0.723875 | 0.172964  |
| H | 5.540984  | -2.230188 | -0.636163 | 0.157864  |
| H | 6.641018  | -0.659656 | 0.946595  | 0.156147  |
| H | 5.252432  | 0.753572  | 2.448831  | 0.149862  |
| H | 2.782221  | 0.604070  | 2.360230  | 0.129306  |
| H | -1.854119 | 2.033224  | -2.948322 | 0.173116  |
| H | -2.564172 | 3.560170  | -2.404245 | 0.198664  |
| H | -0.816645 | 3.439144  | -2.677061 | 0.177107  |
| H | -2.352044 | 0.145179  | -1.656643 | 0.202583  |
| H | -1.901202 | -2.516604 | 1.283607  | 0.176006  |
| H | -3.829052 | -1.841316 | 3.090776  | 0.175841  |
| H | -5.613561 | 0.318777  | 3.207928  | 0.193940  |
| H | -4.857053 | 1.756182  | 2.496100  | 0.182645  |
| H | -6.028815 | 0.818101  | 1.557455  | 0.193373  |
| H | -1.407923 | 3.401931  | -0.210308 | 0.190381  |
| H | -2.432216 | 2.014251  | -0.454876 | 0.217452  |

**14(Z)-a1 $\alpha$**

B3LYP/6-31G(d) energy=-1114.3194936000

Zero-point correction (ZPC)= 0.452811

Number of Imaginary Frequencies=0

|   |           |           |           |           |
|---|-----------|-----------|-----------|-----------|
| C | 1.640688  | -1.249591 | -1.966328 | -0.461748 |
| C | 1.818887  | -1.621937 | -0.628033 | 0.347348  |
| C | 3.015024  | -1.267828 | 0.015032  | -0.198075 |
| C | 4.002129  | -0.556191 | -0.666670 | -0.209453 |
| C | 3.815943  | -0.197858 | -2.003600 | 0.358567  |
| C | 2.630348  | -0.545287 | -2.653114 | 0.084619  |
| C | 0.790181  | -2.488985 | 0.071141  | -0.458144 |
| C | -0.146837 | -1.840160 | 1.122390  | -0.085007 |
| N | -1.078442 | -0.762910 | 0.679726  | 0.637104  |
| C | -0.789237 | 0.535467  | 1.429140  | -0.452244 |
| N | 0.213102  | 0.104532  | 2.384984  | 0.416990  |
| C | 0.630877  | -1.185422 | 2.261533  | -0.374624 |
| C | -0.385708 | 1.715593  | 0.616920  | -0.467710 |
| O | 0.752211  | 1.647697  | -0.135406 | -0.385676 |
| C | 0.969798  | 2.896257  | -0.658912 | 0.164050  |
| C | -0.012806 | 3.748660  | -0.236817 | -0.188241 |
| C | -0.888414 | 2.987845  | 0.594197  | -0.131899 |
| C | 2.159494  | 3.069052  | -1.532191 | -0.130335 |
| C | -2.176521 | -0.949128 | -0.026435 | -0.132045 |
| C | -3.052725 | 0.172442  | -0.310740 | -0.193714 |
| C | -4.325486 | 0.051421  | -0.753963 | -0.493171 |

|    |           |           |           |           |
|----|-----------|-----------|-----------|-----------|
| C  | -5.223351 | 1.202604  | -1.047380 | -0.339911 |
| O  | 1.468373  | -1.754705 | 2.933454  | -0.529790 |
| C  | 0.749593  | 1.019648  | 3.382683  | -0.172940 |
| C  | -2.537259 | -2.324002 | -0.540382 | -0.057041 |
| C  | -2.411843 | -2.470516 | -2.072732 | -0.512161 |
| H  | -5.576396 | 1.147724  | -2.086081 | 0.208681  |
| H  | -1.940631 | -3.091512 | -0.049114 | 0.195730  |
| H  | -3.575381 | -2.515006 | -0.246405 | 0.199608  |
| H  | -0.749341 | -2.637722 | 1.569650  | 0.214463  |
| H  | 1.451920  | 0.449250  | 3.991770  | 0.225435  |
| H  | -0.052763 | 1.409455  | 4.018653  | 0.178787  |
| H  | 1.271303  | 1.854421  | 2.905342  | 0.194626  |
| H  | -2.650780 | 1.167889  | -0.166149 | 0.182839  |
| H  | -4.735277 | 2.167604  | -0.890014 | 0.187923  |
| H  | -6.123743 | 1.150574  | -0.420418 | 0.208307  |
| H  | -4.762866 | -0.934139 | -0.902630 | 0.181663  |
| H  | 1.303609  | -3.268051 | 0.647318  | 0.212690  |
| H  | 0.180118  | -3.009550 | -0.672816 | 0.166279  |
| H  | 0.735213  | -1.542556 | -2.493454 | 0.126737  |
| H  | 2.484476  | -0.289559 | -3.699173 | 0.146591  |
| H  | 4.597498  | 0.332104  | -2.540896 | 0.151749  |
| H  | 4.929748  | -0.305754 | -0.159642 | 0.153852  |
| H  | 3.183361  | -1.572757 | 1.043719  | 0.171095  |
| H  | -2.699646 | -3.485832 | -2.359093 | 0.197651  |
| H  | -3.060264 | -1.767221 | -2.600951 | 0.174468  |
| H  | -1.385445 | -2.301600 | -2.408701 | 0.191569  |
| H  | -1.717531 | 0.811328  | 1.947733  | 0.192285  |
| H  | -1.764221 | 3.345310  | 1.120813  | 0.165762  |
| H  | -0.094998 | 4.797424  | -0.484536 | 0.171918  |
| H  | 2.083537  | 2.451975  | -2.434049 | 0.187522  |
| H  | 2.248018  | 4.116482  | -1.830476 | 0.184999  |
| H  | 3.076554  | 2.771927  | -1.012188 | 0.192044  |
| XX | 2.824962  | -0.915579 | -1.298012 | 0.000000  |

**14(Z)-a2 $\alpha$**

B3LYP/6-31G(d) energy=-1114.3197200000

Zero-point correction (ZPC)= 0.452859

Number of Imaginary Frequencies=0

|   |           |           |           |           |
|---|-----------|-----------|-----------|-----------|
| C | 1.516265  | -0.913434 | -2.275364 | -0.461678 |
| C | 1.634661  | -1.618926 | -1.071014 | 0.346859  |
| C | 2.845719  | -1.556484 | -0.366055 | -0.198207 |
| C | 3.913275  | -0.807243 | -0.860482 | -0.209652 |
| C | 3.788177  | -0.116893 | -2.068256 | 0.358611  |
| C | 2.584869  | -0.167641 | -2.774435 | 0.088195  |
| C | 0.512042  | -2.520046 | -0.603072 | -0.464441 |
| C | -0.429648 | -2.012577 | 0.522750  | -0.075739 |
| N | -1.143832 | -0.716477 | 0.336541  | 0.635435  |
| C | -0.737180 | 0.282209  | 1.417421  | -0.454000 |
| N | 0.116661  | -0.532474 | 2.261041  | 0.418329  |
| C | 0.342818  | -1.801636 | 1.823744  | -0.377246 |
| C | -0.115563 | 1.561737  | 0.980207  | -0.464417 |
| O | 1.061156  | 1.532910  | 0.287843  | -0.395361 |
| C | 1.479521  | 2.830818  | 0.141639  | 0.167769  |
| C | 0.584613  | 3.672227  | 0.742701  | -0.185789 |
| C | -0.445415 | 2.852147  | 1.292438  | -0.131836 |
| C | 2.748138  | 3.058513  | -0.597782 | -0.129908 |
| C | -2.180597 | -0.532831 | -0.459105 | -0.131193 |
| C | -2.833853 | 0.758132  | -0.520587 | -0.184477 |
| C | -3.948792 | 1.012933  | -1.245748 | -0.493538 |
| C | -4.615153 | 2.342093  | -1.316052 | -0.339807 |
| O | 1.037874  | -2.647782 | 2.351049  | -0.530177 |
| C | 0.710529  | 0.003068  | 3.478169  | -0.165765 |
| C | -2.737894 | -1.698594 | -1.242828 | -0.055726 |
| C | -3.872690 | -2.409746 | -0.464998 | -0.512471 |

|    |           |           |           |          |
|----|-----------|-----------|-----------|----------|
| H  | -4.673187 | 2.678152  | -2.360210 | 0.209837 |
| H  | -3.115001 | -1.337908 | -2.201977 | 0.194850 |
| H  | -1.954873 | -2.416474 | -1.475963 | 0.197928 |
| H  | -1.179700 | -2.788189 | 0.708694  | 0.210881 |
| H  | 1.263544  | -0.812059 | 3.946455  | 0.225095 |
| H  | -0.067789 | 0.357612  | 4.162704  | 0.178512 |
| H  | 1.393495  | 0.826291  | 3.248947  | 0.194836 |
| H  | -2.382991 | 1.577391  | 0.024199  | 0.178378 |
| H  | -4.099627 | 3.103740  | -0.726002 | 0.188646 |
| H  | -5.653972 | 2.262574  | -0.967639 | 0.208588 |
| H  | -4.419604 | 0.221464  | -1.825333 | 0.183047 |
| H  | 0.929047  | -3.437188 | -0.170464 | 0.216058 |
| H  | -0.081849 | -2.832781 | -1.466429 | 0.175763 |
| H  | 0.593797  | -0.977112 | -2.849728 | 0.116380 |
| H  | 2.485799  | 0.351420  | -3.723935 | 0.146607 |
| H  | 4.630214  | 0.442751  | -2.466014 | 0.151476 |
| H  | 4.852713  | -0.785389 | -0.315237 | 0.153497 |
| H  | 2.960064  | -2.118995 | 0.556494  | 0.166828 |
| H  | -4.241429 | -3.249035 | -1.061084 | 0.202565 |
| H  | -3.523622 | -2.806885 | 0.493549  | 0.178947 |
| H  | -4.709746 | -1.735402 | -0.265122 | 0.175813 |
| H  | -1.657840 | 0.550227  | 1.954275  | 0.190826 |
| H  | -1.307016 | 3.178595  | 1.861038  | 0.165268 |
| H  | 0.658931  | 4.749239  | 0.793260  | 0.171497 |
| H  | 2.674720  | 2.702816  | -1.630976 | 0.188363 |
| H  | 2.980067  | 4.126243  | -0.609334 | 0.184756 |
| H  | 3.580763  | 2.523573  | -0.128071 | 0.190884 |
| XX | 2.717426  | -0.875948 | -1.556403 | 0.000000 |

#### 14(Z)-a1β

B3LYP/6-31G(d) energy=-1114.3231390000

Zero-point correction (ZPC)=0.45312

Number of Imaginary Frequencies=0

|   |           |           |           |           |
|---|-----------|-----------|-----------|-----------|
| C | 1.855048  | -0.481552 | -2.138650 | -0.489969 |
| C | 2.340296  | -0.950232 | -0.910624 | 0.345933  |
| C | 3.458496  | -0.317909 | -0.343361 | -0.177054 |
| C | 4.065143  | 0.761874  | -0.987584 | -0.218511 |
| C | 3.569821  | 1.220781  | -2.211088 | 0.362812  |
| C | 2.463104  | 0.594859  | -2.786785 | 0.070250  |
| C | 1.717098  | -2.157546 | -0.239828 | -0.453482 |
| C | 0.734561  | -1.904200 | 0.933165  | -0.090308 |
| N | -0.514449 | -1.145624 | 0.649601  | 0.632394  |
| C | -0.514039 | 0.182998  | 1.411975  | -0.457502 |
| N | 0.626503  | 0.010774  | 2.286995  | 0.412570  |
| C | 1.379495  | -1.102989 | 2.062586  | -0.373223 |
| C | -0.445598 | 1.422113  | 0.583829  | -0.467331 |
| O | -1.622844 | 2.132777  | 0.486349  | -0.380127 |
| C | -1.358795 | 3.265445  | -0.239651 | 0.150837  |
| C | -0.039154 | 3.278452  | -0.592629 | -0.194499 |
| C | 0.553406  | 2.092653  | -0.059558 | -0.138154 |
| C | -2.493803 | 4.199741  | -0.467494 | -0.131760 |
| C | -1.583475 | -1.628597 | 0.048123  | -0.125538 |
| C | -2.783949 | -0.819687 | -0.056162 | -0.189912 |
| C | -3.992178 | -1.302642 | -0.429674 | -0.492363 |
| C | -5.229080 | -0.478287 | -0.520076 | -0.338890 |
| O | 2.390826  | -1.437358 | 2.647197  | -0.534239 |
| C | 0.926880  | 0.973641  | 3.338843  | -0.187328 |
| C | -1.569441 | -3.025733 | -0.530690 | -0.058583 |
| C | -1.547898 | -3.059352 | -2.075232 | -0.512560 |
| H | -5.649838 | -0.540021 | -1.532852 | 0.206356  |
| H | -0.726568 | -3.597899 | -0.144100 | 0.194064  |
| H | -2.469320 | -3.536755 | -0.172661 | 0.199719  |
| H | 0.452551  | -2.873884 | 1.355077  | 0.216119  |
| H | 1.815834  | 0.612815  | 3.857708  | 0.224946  |

|    |           |           |           |          |
|----|-----------|-----------|-----------|----------|
| H  | 0.092631  | 1.040350  | 4.046137  | 0.181199 |
| H  | 1.121912  | 1.962344  | 2.914598  | 0.192477 |
| H  | -2.713912 | 0.234644  | 0.181415  | 0.208044 |
| H  | -5.053134 | 0.571029  | -0.270837 | 0.189041 |
| H  | -6.000316 | -0.879535 | 0.151330  | 0.208394 |
| H  | -4.112652 | -2.356399 | -0.673218 | 0.180605 |
| H  | 2.503301  | -2.771825 | 0.214243  | 0.211912 |
| H  | 1.222997  | -2.786864 | -0.985927 | 0.168960 |
| H  | 1.006827  | -0.973913 | -2.609255 | 0.128717 |
| H  | 2.080058  | 0.934832  | -3.744736 | 0.151344 |
| H  | 4.053376  | 2.050304  | -2.718970 | 0.156793 |
| H  | 4.937434  | 1.231704  | -0.542088 | 0.159346 |
| H  | 3.862205  | -0.681602 | 0.597334  | 0.173370 |
| H  | -1.564897 | -4.100474 | -2.409270 | 0.197794 |
| H  | -2.412159 | -2.546401 | -2.504180 | 0.174670 |
| H  | -0.644277 | -2.591205 | -2.474893 | 0.189131 |
| H  | -1.445016 | 0.210713  | 1.992453  | 0.203366 |
| H  | 1.587368  | 1.789281  | -0.140705 | 0.187827 |
| H  | 0.458675  | 4.052084  | -1.160135 | 0.170038 |
| H  | -2.917565 | 4.551241  | 0.480486  | 0.191776 |
| H  | -2.148272 | 5.069593  | -1.031131 | 0.193210 |
| H  | -3.301095 | 3.723458  | -1.036977 | 0.177626 |
| XX | 2.965226  | 0.130861  | -1.543634 | 0.000000 |

#### 14(Z)-a2β

B3LYP/6-31G(d) energy=-1114.3235341000

Zero-point correction (ZPC)=0.453083

Number of Imaginary Frequencies=0

|   |           |           |           |           |
|---|-----------|-----------|-----------|-----------|
| C | 3.442779  | -0.574849 | -0.412024 | -0.175956 |
| C | 2.293675  | -0.966048 | -1.117281 | 0.346105  |
| C | 1.913997  | -0.231960 | -2.248915 | -0.490616 |
| C | 2.658513  | 0.871883  | -2.668117 | 0.363318  |
| C | 3.796859  | 1.256408  | -1.957355 | -0.219435 |
| C | 4.186408  | 0.531106  | -0.828085 | 0.072494  |
| C | 1.523524  | -2.204386 | -0.709984 | -0.457179 |
| C | 0.498404  | -2.078773 | 0.451503  | -0.084141 |
| N | -0.632539 | -1.123471 | 0.297320  | 0.631151  |
| C | -0.504070 | 0.024539  | 1.301567  | -0.458928 |
| N | 0.572041  | -0.453202 | 2.144721  | -0.384213 |
| C | 1.174117  | -1.606805 | 1.738244  | 0.153118  |
| C | -0.265803 | 1.384837  | 0.737761  | -0.181609 |
| C | 0.822121  | 2.049069  | 0.251781  | -0.125366 |
| C | 0.383417  | 3.377513  | -0.038375 | -0.131423 |
| C | -0.939885 | 3.448161  | 0.293133  | -0.138911 |
| O | -1.351967 | 2.233017  | 0.775445  | -0.194047 |
| C | -1.955413 | 4.534338  | 0.247226  | 0.412814  |
| C | -1.720928 | -1.343281 | -0.413801 | -0.377577 |
| C | -2.796055 | -0.372119 | -0.421341 | -0.463353 |
| C | -3.967943 | -0.546038 | -1.077590 | -0.338836 |
| C | -5.079252 | 0.444542  | -1.078167 | -0.492652 |
| O | 2.097982  | -2.183071 | 2.277576  | -0.534153 |
| C | 0.942675  | 0.245600  | 3.368475  | -0.183727 |
| C | -1.872812 | -2.650264 | -1.158218 | -0.057365 |
| C | -2.633045 | -3.702975 | -0.315709 | -0.513195 |
| H | -5.320901 | 0.739498  | -2.108280 | 0.207426  |
| H | -2.407918 | -2.467033 | -2.092423 | 0.195129  |
| H | -0.899486 | -3.046398 | -1.441537 | 0.197410  |
| H | 0.083289  | -3.072355 | 0.644175  | 0.211846  |
| H | 1.760570  | -0.316094 | 3.821430  | 0.224729  |
| H | 0.095055  | 0.280529  | 4.062229  | 0.180841  |
| H | 1.271364  | 1.264407  | 3.146617  | 0.192683  |
| H | -2.654209 | 0.557541  | 0.115513  | 0.205609  |
| H | -4.845016 | 1.339011  | -0.495809 | 0.189562  |
| H | -5.992447 | -0.013759 | -0.674525 | 0.208386  |

|    |           |           |           |          |
|----|-----------|-----------|-----------|----------|
| H  | -4.149602 | -1.453916 | -1.649135 | 0.181733 |
| H  | 2.218710  | -2.969774 | -0.345798 | 0.213458 |
| H  | 1.028037  | -2.629464 | -1.587802 | 0.175807 |
| H  | 1.042670  | -0.538882 | -2.824048 | 0.121850 |
| H  | 2.357375  | 1.421213  | -3.555534 | 0.151269 |
| H  | 4.386141  | 2.106240  | -2.289677 | 0.156721 |
| H  | 5.081582  | 0.813477  | -0.281229 | 0.159172 |
| H  | 3.763761  | -1.147805 | 0.453612  | 0.171535 |
| H  | -2.734648 | -4.622127 | -0.899278 | 0.201469 |
| H  | -2.099384 | -3.949093 | 0.607844  | 0.179560 |
| H  | -3.633254 | -3.355536 | -0.043500 | 0.176328 |
| H  | -1.446973 | 0.052844  | 1.863072  | 0.202522 |
| H  | 1.817186  | 1.649124  | 0.120828  | 0.187716 |
| H  | 0.982560  | 4.184827  | -0.435444 | 0.169643 |
| H  | -2.366043 | 4.738976  | 1.242885  | 0.191627 |
| H  | -1.497468 | 5.452136  | -0.129124 | 0.193118 |
| H  | -2.793282 | 4.276581  | -0.411872 | 0.176837 |
| XX | 3.052927  | 0.138181  | -1.522517 | 0.000000 |

**14(Z)-b1a**

B3LYP/6-31G(d) energy=-1114.3239753000

Zero-point correction (ZPC)= 0.452708

Number of Imaginary Frequencies=0

|   |           |           |           |           |
|---|-----------|-----------|-----------|-----------|
| O | 1.730862  | -1.275235 | -1.068001 | -0.481294 |
| C | 2.248513  | -0.118931 | -0.546874 | 0.377577  |
| C | 3.224375  | 0.364980  | -1.370846 | -0.197942 |
| C | 3.310101  | -0.543035 | -2.471788 | -0.212332 |
| C | 2.386963  | -1.524620 | -2.249437 | 0.365570  |
| C | 1.777836  | 0.325822  | 0.796501  | 0.033265  |
| N | 0.279721  | 0.542333  | 0.918677  | -0.431885 |
| C | -0.318981 | -0.577700 | 1.692958  | -0.097524 |
| C | 0.893810  | -1.154855 | 2.430695  | 0.621275  |
| N | 2.018768  | -0.617289 | 1.873103  | -0.436140 |
| C | -0.294788 | 1.680423  | 0.584080  | 0.418398  |
| C | -1.730242 | 1.975843  | 0.951469  | -0.371537 |
| C | -2.641767 | 2.338917  | -0.238748 | -0.458490 |
| C | -0.966094 | -1.714775 | 0.857520  | -0.382530 |
| C | -2.236990 | -1.386037 | 0.107364  | 0.165551  |
| C | -2.216675 | -1.226328 | -1.284827 | -0.203060 |
| C | -3.396822 | -0.987651 | -1.994084 | -0.132306 |
| C | -4.613081 | -0.895215 | -1.315654 | -0.125942 |
| C | -4.645030 | -1.048279 | 0.073188  | -0.128212 |
| C | -3.466712 | -1.297333 | 0.777575  | -0.195147 |
| O | 0.833798  | -1.977996 | 3.319565  | -0.477353 |
| C | 3.368074  | -0.993133 | 2.268455  | -0.339886 |
| C | 1.983059  | -2.744394 | -2.998103 | -0.537999 |
| C | 0.488259  | 2.681024  | -0.126908 | -0.183288 |
| C | 0.220940  | 4.005229  | -0.102773 | -0.054262 |
| C | 1.022017  | 5.040687  | -0.814092 | -0.511228 |
| H | 0.374521  | 5.619333  | -1.486465 | 0.207684  |
| H | -2.173955 | 1.134831  | 1.480371  | 0.196308  |
| H | -1.699360 | 2.815908  | 1.660275  | 0.196540  |
| H | -1.022881 | -0.182701 | 2.425517  | 0.210559  |
| H | 3.273823  | -1.707364 | 3.087561  | 0.227248  |
| H | 3.928106  | -0.116315 | 2.612492  | 0.178473  |
| H | 3.903709  | -1.459764 | 1.435693  | 0.190370  |
| H | 1.336475  | 2.330034  | -0.705291 | 0.180251  |
| H | 1.841297  | 4.611192  | -1.396423 | 0.184216  |
| H | 1.434972  | 5.762391  | -0.096718 | 0.206253  |
| H | -0.615090 | 4.377080  | 0.487074  | 0.182768  |
| H | -0.210135 | -2.099608 | 0.168121  | 0.191752  |
| H | -1.155298 | -2.503566 | 1.595304  | 0.213386  |
| H | -3.507858 | -1.454092 | 1.854014  | 0.144916  |
| H | -5.590685 | -0.995731 | 0.605132  | 0.158565  |

|   |           |           |           |          |
|---|-----------|-----------|-----------|----------|
| H | -5.532870 | -0.718598 | -1.865488 | 0.158856 |
| H | -3.366608 | -0.885708 | -3.075360 | 0.152651 |
| H | -1.272878 | -1.313944 | -1.818396 | 0.135544 |
| H | -3.652829 | 2.515909  | 0.137517  | 0.188140 |
| H | -2.307132 | 3.239837  | -0.757448 | 0.161649 |
| H | -2.688438 | 1.518050  | -0.957059 | 0.195463 |
| H | 2.269579  | 1.280098  | 1.017205  | 0.194320 |
| H | 3.826659  | 1.249373  | -1.207684 | 0.168414 |
| H | 3.978632  | -0.478534 | -3.318535 | 0.175620 |
| H | 0.930560  | -2.700837 | -3.302942 | 0.186992 |
| H | 2.594670  | -2.844184 | -3.897888 | 0.194102 |
| H | 2.115712  | -3.646376 | -2.389580 | 0.195708 |

**14(Z)-b2a**

B3LYP/6-31G(d) energy=-1114.3270697000

Zero-point correction (ZPC)= 0.452668

Number of Imaginary Frequencies=0

|   |           |           |           |           |
|---|-----------|-----------|-----------|-----------|
| C | -3.315890 | -1.860376 | 0.348265  | -0.194518 |
| C | -2.019952 | -1.646659 | -0.145440 | 0.150022  |
| C | -1.864848 | -1.228283 | -1.474892 | -0.197836 |
| C | -2.979578 | -1.014423 | -2.288669 | -0.130981 |
| C | -4.264686 | -1.217830 | -1.783042 | -0.128563 |
| C | -4.430729 | -1.645666 | -0.463196 | -0.125394 |
| C | -0.815546 | -1.852952 | 0.742783  | -0.375442 |
| C | -0.399263 | -0.632592 | 1.615171  | -0.099453 |
| N | 0.113365  | 0.536712  | 0.857950  | -0.438142 |
| C | 1.629739  | 0.526581  | 0.869945  | 0.039743  |
| N | 1.896279  | -0.359585 | 1.989658  | -0.439264 |
| C | 0.806810  | -1.032537 | 2.468112  | 0.620930  |
| C | 2.280533  | 0.132181  | -0.412729 | 0.377339  |
| O | 1.959297  | -1.082393 | -0.958658 | -0.481859 |
| C | 2.747825  | -1.255711 | -2.071149 | 0.365102  |
| C | 3.560047  | -0.168808 | -2.224795 | -0.213211 |
| C | 3.261717  | 0.728256  | -1.151849 | -0.198159 |
| C | 2.564770  | -2.520630 | -2.831296 | -0.536697 |
| C | -0.603968 | 1.544410  | 0.399194  | 0.421709  |
| C | 0.046369  | 2.598093  | -0.355304 | -0.173389 |
| C | -0.560059 | 3.747198  | -0.733727 | -0.052672 |
| C | 0.100623  | 4.826353  | -1.518218 | -0.512354 |
| O | 0.780763  | -1.841576 | 3.371556  | -0.477900 |
| C | 3.244167  | -0.552620 | 2.503312  | -0.339797 |
| C | -2.074780 | 1.632746  | 0.729806  | -0.380417 |
| C | -2.308411 | 2.402755  | 2.052051  | -0.466293 |
| H | -0.462413 | 5.018797  | -2.441440 | 0.208740  |
| H | -2.592684 | 2.130967  | -0.091680 | 0.192122  |
| H | -2.512318 | 0.637704  | 0.793778  | 0.218170  |
| H | -1.218635 | -0.324526 | 2.265055  | 0.209236  |
| H | 3.171014  | -1.254790 | 3.334889  | 0.226920  |
| H | 3.660407  | 0.395333  | 2.862403  | 0.178068  |
| H | 3.901358  | -0.966345 | 1.731868  | 0.190302  |
| H | 1.073377  | 2.438461  | -0.662249 | 0.173435  |
| H | 1.135077  | 4.586705  | -1.776930 | 0.185750  |
| H | 0.083914  | 5.768396  | -0.953448 | 0.208266  |
| H | -1.596372 | 3.932364  | -0.458529 | 0.184762  |
| H | 0.051648  | -2.154950 | 0.149589  | 0.192687  |
| H | -1.003261 | -2.650303 | 1.470661  | 0.209349  |
| H | -3.452050 | -2.212110 | 1.368983  | 0.148041  |
| H | -5.427206 | -1.825926 | -0.070206 | 0.159654  |
| H | -5.131939 | -1.059132 | -2.417294 | 0.158015  |
| H | -2.843883 | -0.701553 | -3.320313 | 0.149938  |
| H | -0.864548 | -1.087814 | -1.878285 | 0.134848  |
| H | -3.383213 | 2.456959  | 2.246496  | 0.199732  |
| H | -1.838108 | 1.901299  | 2.904226  | 0.176744  |
| H | -1.917091 | 3.423120  | 2.005285  | 0.171330  |

|   |          |           |           |          |
|---|----------|-----------|-----------|----------|
| H | 1.968032 | 1.541696  | 1.109778  | 0.192124 |
| H | 3.731767 | 1.682259  | -0.950511 | 0.168121 |
| H | 4.291166 | -0.026848 | -3.007981 | 0.175147 |
| H | 1.542112 | -2.614359 | -3.215605 | 0.187417 |
| H | 3.252588 | -2.545256 | -3.679820 | 0.193348 |
| H | 2.763931 | -3.395201 | -2.201157 | 0.195364 |

**14(Z)-b1δ**

B3LYP/6-31G(d) energy=-1114.3233024000  
 Zero-point correction (ZPC)= 0.452741  
 Number of Imaginary Frequencies=0

|   |           |           |           |           |
|---|-----------|-----------|-----------|-----------|
| O | -2.628824 | 0.569383  | 1.045732  | -0.487519 |
| C | -2.094817 | -0.611522 | 0.594364  | 0.379559  |
| C | -2.176722 | -1.560639 | 1.572240  | -0.200668 |
| C | -2.789219 | -0.925439 | 2.697801  | -0.215430 |
| C | -3.048160 | 0.366022  | 2.338551  | 0.367667  |
| C | -1.612784 | -0.621862 | -0.820668 | 0.032934  |
| N | -0.174179 | -0.155236 | -1.005678 | -0.425055 |
| C | 0.697459  | -1.355556 | -1.094588 | -0.102818 |
| C | -0.288007 | -2.439896 | -1.550833 | 0.618489  |
| N | -1.555402 | -1.950979 | -1.387045 | -0.446795 |
| C | 0.143194  | 1.094955  | -1.276837 | 0.406905  |
| C | 1.546563  | 1.476517  | -1.686432 | -0.368558 |
| C | 2.233426  | 2.486966  | -0.744017 | -0.458975 |
| C | 1.374898  | -1.797814 | 0.229557  | -0.374652 |
| C | 2.523601  | -0.948039 | 0.725079  | 0.168295  |
| C | 2.392226  | -0.183624 | 1.891783  | -0.201877 |
| C | 3.471029  | 0.555017  | 2.385628  | -0.129990 |
| C | 4.692907  | 0.543799  | 1.711660  | -0.125952 |
| C | 4.835303  | -0.215473 | 0.546894  | -0.128425 |
| C | 3.760116  | -0.959775 | 0.061318  | -0.195708 |
| O | 0.029452  | -3.537542 | -1.956356 | -0.474667 |
| C | -2.757439 | -2.697551 | -1.735890 | -0.339635 |
| C | -3.670081 | 1.524127  | 3.033870  | -0.534997 |
| C | -0.883388 | 2.124927  | -1.194993 | -0.193598 |
| C | -0.812270 | 3.309350  | -1.842731 | -0.055392 |
| C | -1.861847 | 4.365097  | -1.780565 | -0.511502 |
| H | -1.425111 | 5.309041  | -1.427663 | 0.205464  |
| H | 2.180882  | 0.596319  | -1.771127 | 0.192625  |
| H | 1.470168  | 1.907637  | -2.693805 | 0.195843  |
| H | 1.441446  | -1.217855 | -1.879060 | 0.212915  |
| H | -2.431696 | -3.662699 | -2.126465 | 0.227210  |
| H | -3.328901 | -2.166989 | -2.505721 | 0.182578  |
| H | -3.390694 | -2.851523 | -0.857515 | 0.188721  |
| H | -1.750451 | 1.927748  | -0.574313 | 0.204205  |
| H | -2.692945 | 4.092067  | -1.125337 | 0.186295  |
| H | -2.254174 | 4.570877  | -2.785473 | 0.205947  |
| H | 0.043123  | 3.531510  | -2.478257 | 0.181191  |
| H | 0.605371  | -1.876477 | 1.002837  | 0.172462  |
| H | 1.724100  | -2.816916 | 0.022196  | 0.215426  |
| H | 3.892808  | -1.578048 | -0.824939 | 0.144244  |
| H | 5.789559  | -0.244309 | 0.028719  | 0.158568  |
| H | 5.534528  | 1.111039  | 2.098196  | 0.159188  |
| H | 3.358410  | 1.128882  | 3.301170  | 0.154596  |
| H | 1.448049  | -0.185805 | 2.432176  | 0.138158  |
| H | 3.234682  | 2.698984  | -1.128328 | 0.188463  |
| H | 1.683521  | 3.428567  | -0.679745 | 0.162620  |
| H | 2.338823  | 2.073080  | 0.260922  | 0.195208  |
| H | -2.243458 | 0.030875  | -1.433587 | 0.203135  |
| H | -1.859627 | -2.592094 | 1.501083  | 0.178382  |
| H | -3.019733 | -1.378121 | 3.651835  | 0.176368  |
| H | -4.562647 | 1.875851  | 2.503233  | 0.190463  |
| H | -3.966420 | 1.232205  | 4.044125  | 0.194891  |
| H | -2.973494 | 2.367403  | 3.111759  | 0.183061  |

**14(Z)-b2δ**

B3LYP/6-31G(d) energy= -1114.3252398000  
 Zero-point correction (ZPC)= 0.45267  
 Number of Imaginary Frequencies=0

|   |           |           |           |           |
|---|-----------|-----------|-----------|-----------|
| O | -2.740750 | 0.722596  | 0.687576  | -0.488042 |
| C | -2.147655 | -0.499892 | 0.494848  | 0.379570  |
| C | -2.349707 | -1.290263 | 1.589554  | -0.201458 |
| C | -3.102851 | -0.505422 | 2.518018  | -0.213331 |
| C | -3.320258 | 0.708988  | 1.933342  | 0.366031  |
| C | -1.489781 | -0.712163 | -0.830888 | 0.038149  |
| N | -0.029385 | -0.291876 | -0.898119 | -0.430073 |
| C | 0.820097  | -1.496786 | -0.736493 | -0.105549 |
| C | -0.129670 | -2.625428 | -1.152561 | 0.619374  |
| N | -1.396915 | -2.108378 | -1.199022 | -0.449544 |
| C | 0.378077  | 0.916104  | -1.236378 | 0.411857  |
| C | 1.833092  | 1.146822  | -1.571362 | -0.381455 |
| C | 2.113135  | 0.918282  | -3.075985 | -0.465906 |
| C | 1.332560  | -1.749573 | 0.710488  | -0.368810 |
| C | 2.364605  | -0.768556 | 1.217236  | 0.152559  |
| C | 1.983960  | 0.335216  | 1.993018  | -0.194433 |
| C | 2.936906  | 1.253072  | 2.440218  | -0.129868 |
| C | 4.283365  | 1.077333  | 2.117226  | -0.128107 |
| C | 4.675272  | -0.025676 | 1.354105  | -0.125456 |
| C | 3.722599  | -0.943260 | 0.909918  | -0.194231 |
| O | 0.203617  | -3.771158 | -1.368262 | -0.475447 |
| C | -2.569110 | -2.889457 | -1.572541 | -0.339586 |
| C | -4.032020 | 1.943956  | 2.357512  | -0.535080 |
| C | -0.583085 | 1.996793  | -1.346465 | -0.185785 |
| C | -0.286242 | 3.224255  | -1.833529 | -0.054219 |
| C | -1.265828 | 4.340004  | -1.946431 | -0.512683 |
| H | -0.903105 | 5.216901  | -1.393361 | 0.206232  |
| H | 2.101476  | 2.167236  | -1.291630 | 0.191898  |
| H | 2.468872  | 0.499676  | -0.968410 | 0.217723  |
| H | 1.654858  | -1.462531 | -1.436759 | 0.211997  |
| H | -2.222827 | -3.901358 | -1.787729 | 0.226918  |
| H | -3.042133 | -2.468129 | -2.466690 | 0.182256  |
| H | -3.297517 | -2.916088 | -0.757052 | 0.188722  |
| H | -1.591451 | 1.823396  | -0.989619 | 0.197489  |
| H | -2.256931 | 4.068895  | -1.574226 | 0.187676  |
| H | -1.354730 | 4.660200  | -2.993466 | 0.207610  |
| H | 0.720564  | 3.445448  | -2.181975 | 0.183117  |
| H | 0.469566  | -1.773688 | 1.382498  | 0.174376  |
| H | 1.746104  | -2.764171 | 0.679982  | 0.210959  |
| H | 4.037806  | -1.810560 | 0.333154  | 0.148054  |
| H | 5.724198  | -0.179741 | 1.117683  | 0.159947  |
| H | 5.026287  | 1.786145  | 2.471041  | 0.158637  |
| H | 2.629082  | 2.096820  | 3.051516  | 0.151462  |
| H | 0.939160  | 0.465390  | 2.267104  | 0.135932  |
| H | 3.170257  | 1.115263  | -3.275039 | 0.199250  |
| H | 1.901086  | -0.112184 | -3.379651 | 0.176306  |
| H | 1.516266  | 1.582678  | -3.707380 | 0.172185  |
| H | -2.024946 | -0.146684 | -1.601773 | 0.201774  |
| H | -2.024417 | -2.313483 | 1.718332  | 0.178025  |
| H | -3.450618 | -0.812373 | 3.494265  | 0.176186  |
| H | -4.847997 | 2.190939  | 1.668223  | 0.190514  |
| H | -4.457912 | 1.800751  | 3.353386  | 0.194960  |
| H | -3.354595 | 2.805414  | 2.395946  | 0.181533  |

**14(Z)-b1Φ**

B3LYP/6-31G(d) energy= -1114.3189356000  
 Zero-point correction (ZPC)= 0.452668  
 Number of Imaginary Frequencies=0

|   |           |           |          |           |
|---|-----------|-----------|----------|-----------|
| O | -3.416349 | -0.371749 | 0.640920 | -0.477041 |
|---|-----------|-----------|----------|-----------|



|   |           |           |           |           |
|---|-----------|-----------|-----------|-----------|
| C | -2.064665 | -0.193543 | 0.523822  | 0.358374  |
| C | -1.496447 | -0.100567 | 1.760582  | -0.203740 |
| C | -2.566393 | -0.242371 | 2.702602  | -0.214440 |
| C | -3.713437 | -0.408878 | 1.983236  | 0.361680  |
| C | -1.565194 | -0.125059 | -0.891547 | 0.064976  |
| N | -0.097816 | 0.178896  | -0.950747 | -0.446160 |
| C | 0.644389  | -1.067931 | -1.297131 | -0.097976 |
| C | -0.450109 | -1.934438 | -1.934159 | 0.619617  |
| N | -1.655627 | -1.363689 | -1.648781 | -0.446182 |
| C | 0.360661  | 1.416989  | -0.932640 | 0.416684  |
| C | 1.813138  | 1.718200  | -1.206839 | -0.369981 |
| C | 2.556197  | 2.367721  | -0.019161 | -0.458089 |
| C | 1.262922  | -1.855410 | -0.112737 | -0.377796 |
| C | 2.532298  | -1.303773 | 0.498449  | 0.169022  |
| C | 2.566378  | -0.916877 | 1.844480  | -0.208428 |
| C | 3.752456  | -0.464613 | 2.429878  | -0.127037 |
| C | 4.920770  | -0.388903 | 1.671489  | -0.126529 |
| C | 4.901265  | -0.778604 | 0.329172  | -0.128048 |
| C | 3.718256  | -1.238059 | -0.249667 | -0.198635 |
| O | -0.243482 | -2.961631 | -2.545481 | -0.476680 |
| C | -2.928334 | -1.908912 | -2.103736 | -0.337468 |
| C | -5.140650 | -0.613973 | 2.346948  | -0.533659 |
| C | -0.561575 | 2.504787  | -0.649101 | -0.179575 |
| C | -0.327028 | 3.797860  | -0.968572 | -0.053381 |
| C | -1.273095 | 4.915193  | -0.696732 | -0.512668 |
| H | -0.777759 | 5.687794  | -0.093278 | 0.208383  |
| H | 2.349159  | 0.817228  | -1.498904 | 0.194565  |
| H | 1.838142  | 2.395908  | -2.070204 | 0.196871  |
| H | 1.398739  | -0.845933 | -2.051977 | 0.211981  |
| H | -2.698991 | -2.780682 | -2.718044 | 0.224120  |
| H | -3.467629 | -1.168091 | -2.704774 | 0.177789  |
| H | -3.551892 | -2.207681 | -1.257534 | 0.196925  |
| H | -1.491450 | 2.258549  | -0.147512 | 0.189068  |
| H | -2.176437 | 4.584795  | -0.177839 | 0.188978  |
| H | -1.560666 | 5.405135  | -1.636727 | 0.208613  |
| H | 0.595077  | 4.072987  | -1.477275 | 0.183970  |
| H | 0.493558  | -1.993017 | 0.654082  | 0.175918  |
| H | 1.458662  | -2.847935 | -0.538161 | 0.222397  |
| H | 3.725911  | -1.576522 | -1.284493 | 0.144716  |
| H | 5.812750  | -0.744852 | -0.260792 | 0.159362  |
| H | 5.845100  | -0.043964 | 2.125341  | 0.160515  |
| H | 3.763610  | -0.183667 | 3.479165  | 0.156798  |
| H | 1.667737  | -1.003497 | 2.451427  | 0.140993  |
| H | 3.594700  | 2.544226  | -0.310919 | 0.191652  |
| H | 2.112268  | 3.322865  | 0.270589  | 0.163542  |
| H | 2.559708  | 1.704257  | 0.848347  | 0.191744  |
| H | -2.107583 | 0.656035  | -1.440715 | 0.196182  |
| H | -0.451589 | 0.061047  | 1.984847  | 0.156893  |
| H | -2.488352 | -0.222332 | 3.780401  | 0.170637  |
| H | -5.512682 | -1.576175 | 1.975670  | 0.191624  |
| H | -5.250401 | -0.601723 | 3.433964  | 0.190447  |
| H | -5.777769 | 0.172812  | 1.926678  | 0.188097  |

#### 14(Z)-b2Φ

B3LYP/6-31G(d) energy= -1114.3211176000

Zero-point correction (ZPC)= 0.452722

Number of Imaginary Frequencies=0

|   |           |           |           |           |
|---|-----------|-----------|-----------|-----------|
| O | -3.495462 | -0.266219 | 0.444517  | -0.477814 |
| C | -2.133215 | -0.133725 | 0.460173  | 0.356310  |
| C | -1.693442 | 0.013465  | 1.742608  | -0.199676 |
| C | -2.858756 | -0.042871 | 2.573695  | -0.216138 |
| C | -3.930613 | -0.217411 | 1.748075  | 0.361202  |
| C | -1.493038 | -0.164910 | -0.898405 | 0.068175  |
| N | -0.021359 | 0.110777  | -0.839601 | -0.451480 |

|   |           |           |           |           |
|---|-----------|-----------|-----------|-----------|
| C | 0.730848  | -1.157218 | -1.056825 | -0.098147 |
| C | -0.320540 | -2.054733 | -1.719313 | 0.619174  |
| N | -1.536148 | -1.450364 | -1.579323 | -0.448577 |
| C | 0.480828  | 1.332179  | -0.807956 | 0.418919  |
| C | 1.953605  | 1.539560  | -1.058941 | -0.385394 |
| C | 2.243559  | 1.764881  | -2.562789 | -0.464894 |
| C | 1.254639  | -1.861816 | 0.226501  | -0.373742 |
| C | 2.489275  | -1.260800 | 0.861553  | 0.149947  |
| C | 2.413326  | -0.540400 | 2.060174  | -0.201234 |
| C | 3.558955  | 0.017011  | 2.633620  | -0.127210 |
| C | 4.798490  | -0.141045 | 2.013548  | -0.128459 |
| C | 4.890115  | -0.870551 | 0.824707  | -0.124098 |
| C | 3.745409  | -1.429232 | 0.256519  | -0.197459 |
| O | -0.083030 | -3.125637 | -2.237764 | -0.478109 |
| C | -2.773896 | -2.014548 | -2.102183 | -0.337089 |
| C | -5.394079 | -0.360465 | 1.969758  | -0.533598 |
| C | -0.403216 | 2.461409  | -0.601048 | -0.173723 |
| C | -0.007289 | 3.754974  | -0.658505 | -0.052169 |
| C | -0.910506 | 4.918113  | -0.444294 | -0.513570 |
| H | -0.532429 | 5.541228  | 0.377514  | 0.209558  |
| H | 2.295115  | 2.400048  | -0.480374 | 0.192391  |
| H | 2.524442  | 0.687981  | -0.691055 | 0.221860  |
| H | 1.545938  | -0.985044 | -1.760778 | 0.211214  |
| H | -2.505725 | -2.926314 | -2.637636 | 0.223805  |
| H | -3.252214 | -1.310435 | -2.792325 | 0.177673  |
| H | -3.469357 | -2.253021 | -1.293700 | 0.196644  |
| H | -1.439864 | 2.258502  | -0.357109 | 0.185197  |
| H | -1.937601 | 4.619108  | -0.220829 | 0.190100  |
| H | -0.912279 | 5.562724  | -1.333878 | 0.209721  |
| H | 1.030497  | 3.997594  | -0.877663 | 0.185480  |
| H | 0.433136  | -1.925642 | 0.947547  | 0.176788  |
| H | 1.464938  | -2.886136 | -0.104090 | 0.219163  |
| H | 3.830473  | -2.016580 | -0.655918 | 0.148487  |
| H | 5.855641  | -1.018849 | 0.349658  | 0.160271  |
| H | 5.691139  | 0.286091  | 2.460886  | 0.160001  |
| H | 3.483045  | 0.562815  | 3.569803  | 0.154376  |
| H | 1.457836  | -0.441558 | 2.570374  | 0.142425  |
| H | 3.317995  | 1.916371  | -2.698203 | 0.200702  |
| H | 1.946533  | 0.902618  | -3.168458 | 0.177391  |
| H | 1.721008  | 2.643820  | -2.950820 | 0.172887  |
| H | -1.965547 | 0.584950  | -1.547618 | 0.194227  |
| H | -0.672778 | 0.159682  | 2.065108  | 0.157937  |
| H | -2.891138 | 0.036405  | 3.651101  | 0.170578  |
| H | -5.757904 | -1.332343 | 1.615884  | 0.191548  |
| H | -5.616330 | -0.280456 | 3.036539  | 0.190310  |
| H | -5.956838 | 0.417195  | 1.440450  | 0.187762  |

#### 14(Z)-c1α

B3LYP/6-31G(d) energy= -1114.32355670

Zero-point correction (ZPC)= 0.452552

Number of Imaginary Frequencies=0

|   |           |           |           |           |
|---|-----------|-----------|-----------|-----------|
| O | -1.694855 | -1.492786 | 1.103019  | -0.482194 |
| C | -2.411315 | -0.939306 | 0.075194  | 0.377269  |
| C | -3.746376 | -0.988084 | 0.355153  | -0.197108 |
| C | -3.862852 | -1.606208 | 1.639905  | -0.213673 |
| C | -2.595252 | -1.896298 | 2.058599  | 0.364272  |
| C | -1.640033 | -0.496960 | -1.121396 | 0.029132  |
| N | -0.506647 | 0.446287  | -0.782264 | -0.443367 |
| C | 0.797493  | -0.260342 | -0.894121 | -0.086167 |
| C | 0.426412  | -1.531684 | -1.658946 | 0.614154  |
| N | -0.930395 | -1.562278 | -1.805548 | -0.434899 |
| C | -0.668130 | 1.728683  | -0.533889 | 0.418843  |
| C | 0.531359  | 2.598532  | -0.240436 | -0.381014 |
| C | 0.564904  | 3.104675  | 1.219753  | -0.458144 |

|   |           |           |           |           |
|---|-----------|-----------|-----------|-----------|
| C | 1.496390  | -0.572095 | 0.468188  | -0.365938 |
| C | 2.983530  | -0.271623 | 0.453596  | 0.145941  |
| C | 3.539881  | 0.585017  | 1.412131  | -0.200968 |
| C | 4.909658  | 0.857834  | 1.415107  | -0.126408 |
| C | 5.737752  | 0.279118  | 0.453530  | -0.124583 |
| C | 5.191653  | -0.578076 | -0.505089 | -0.129427 |
| C | 3.824928  | -0.856156 | -0.505554 | -0.196782 |
| O | 1.221747  | -2.360664 | -2.053899 | -0.477072 |
| C | -1.640566 | -2.668633 | -2.431433 | -0.341128 |
| C | -2.035793 | -2.531956 | 3.280987  | -0.534147 |
| C | -2.004845 | 2.296312  | -0.512265 | -0.173855 |
| C | -2.263524 | 3.620705  | -0.600198 | -0.052979 |
| C | -3.629682 | 4.213470  | -0.595913 | -0.512010 |
| H | -3.719179 | 4.945561  | 0.217918  | 0.208435  |
| H | 1.460466  | 2.068919  | -0.451353 | 0.208478  |
| H | 0.500135  | 3.456839  | -0.921523 | 0.199522  |
| H | 1.461062  | 0.330701  | -1.528893 | 0.225150  |
| H | -0.886284 | -3.345304 | -2.834938 | 0.227302  |
| H | -2.276994 | -2.304125 | -3.245083 | 0.180152  |
| H | -2.257078 | -3.202054 | -1.700748 | 0.190869  |
| H | -2.841147 | 1.613051  | -0.417238 | 0.176924  |
| H | -4.414457 | 3.461163  | -0.483352 | 0.186008  |
| H | -3.802781 | 4.772682  | -1.525229 | 0.208973  |
| H | -1.442695 | 4.328564  | -0.701289 | 0.182675  |
| H | 1.004836  | 0.004139  | 1.257469  | 0.162725  |
| H | 1.319374  | -1.626354 | 0.706891  | 0.206577  |
| H | 3.407579  | -1.536609 | -1.243688 | 0.176567  |
| H | 5.832913  | -1.039379 | -1.250738 | 0.155269  |
| H | 6.803251  | 0.489669  | 0.453417  | 0.154242  |
| H | 5.326728  | 1.519066  | 2.169453  | 0.148649  |
| H | 2.903539  | 1.029326  | 2.174800  | 0.123668  |
| H | 1.473165  | 3.694952  | 1.367539  | 0.198646  |
| H | -0.298203 | 3.731771  | 1.455114  | 0.171760  |
| H | 0.583520  | 2.273439  | 1.930514  | 0.179301  |
| H | -2.322564 | 0.008419  | -1.813709 | 0.194291  |
| H | -4.553502 | -0.643605 | -0.278330 | 0.168474  |
| H | -4.774825 | -1.814855 | 2.181077  | 0.174872  |
| H | -1.370433 | -1.847438 | 3.820340  | 0.184636  |
| H | -2.847550 | -2.820509 | 3.952860  | 0.193097  |
| H | -1.458283 | -3.430044 | 3.033027  | 0.194879  |

#### 14(Z)-c2a

B3LYP/6-31G(d) energy= -1114.32503070

Zero-point correction (ZPC)= 0.45248

Number of Imaginary Frequencies=0

|   |           |           |           |           |
|---|-----------|-----------|-----------|-----------|
| O | 1.771725  | -1.633022 | -0.905872 | -0.481827 |
| C | 2.447990  | -0.896655 | 0.030046  | 0.378438  |
| C | 3.789962  | -0.948042 | -0.213504 | -0.197059 |
| C | 3.953889  | -1.762874 | -1.377509 | -0.214345 |
| C | 2.705151  | -2.157588 | -1.766153 | 0.364754  |
| C | 1.642604  | -0.286520 | 1.125518  | 0.030311  |
| N | 0.494816  | 0.565363  | 0.632821  | -0.443955 |
| C | -0.792548 | -0.150414 | 0.825785  | -0.085038 |
| C | -0.414894 | -1.257502 | 1.809742  | 0.613075  |
| N | 0.941961  | -1.242039 | 1.965784  | -0.435555 |
| C | 0.615882  | 1.794179  | 0.176377  | 0.418678  |
| C | -0.634231 | 2.586901  | -0.127471 | -0.385697 |
| C | -1.094616 | 3.422678  | 1.091738  | -0.461831 |
| C | -1.408743 | -0.726737 | -0.493316 | -0.365390 |
| C | -2.898353 | -0.469745 | -0.612315 | 0.144439  |
| C | -3.407580 | 0.236835  | -1.709551 | -0.197514 |
| C | -4.779177 | 0.472419  | -1.830483 | -0.127444 |
| C | -5.655441 | 0.005009  | -0.851216 | -0.124896 |
| C | -5.155997 | -0.702561 | 0.245338  | -0.129353 |

|   |           |           |           |           |
|---|-----------|-----------|-----------|-----------|
| C | -3.787318 | -0.941830 | 0.365635  | -0.195245 |
| O | -1.201425 | -2.019010 | 2.336151  | -0.478162 |
| C | 1.663509  | -2.214424 | 2.773991  | -0.340758 |
| C | 2.192738  | -3.000544 | -2.878906 | -0.534062 |
| C | 1.929766  | 2.382871  | 0.016936  | -0.169007 |
| C | 2.146008  | 3.667868  | -0.348825 | -0.052133 |
| C | 3.493295  | 4.278894  | -0.513444 | -0.512521 |
| H | 3.603916  | 4.677284  | -1.531005 | 0.209814  |
| H | -0.436910 | 3.246819  | -0.975071 | 0.191717  |
| H | -1.443099 | 1.924088  | -0.439594 | 0.214098  |
| H | -1.503824 | 0.518172  | 1.313523  | 0.221462  |
| H | 0.916561  | -2.820409 | 3.288361  | 0.226925  |
| H | 2.293504  | -1.706706 | 3.512357  | 0.179402  |
| H | 2.288396  | -2.858823 | 2.147272  | 0.191237  |
| H | 2.792509  | 1.747375  | 0.177607  | 0.173339  |
| H | 4.303543  | 3.571931  | -0.318480 | 0.186858  |
| H | 3.601808  | 5.139622  | 0.160400  | 0.209510  |
| H | 1.302965  | 4.329241  | -0.538485 | 0.184841  |
| H | -0.881276 | -0.291195 | -1.347497 | 0.165094  |
| H | -1.200398 | -1.801436 | -0.523503 | 0.206096  |
| H | -3.404321 | -1.501837 | 1.215389  | 0.175365  |
| H | -5.835017 | -1.076400 | 1.006383  | 0.155566  |
| H | -6.722485 | 0.185338  | -0.943625 | 0.154383  |
| H | -5.159876 | 1.015620  | -2.690789 | 0.149359  |
| H | -2.731351 | 0.590056  | -2.486051 | 0.124258  |
| H | -2.001720 | 3.971645  | 0.825065  | 0.203101  |
| H | -1.326735 | 2.789880  | 1.954133  | 0.179786  |
| H | -0.332153 | 4.144272  | 1.398401  | 0.172721  |
| H | 2.304575  | 0.337509  | 1.737004  | 0.192931  |
| H | 4.571994  | -0.478749 | 0.369310  | 0.167456  |
| H | 4.883706  | -2.027279 | -1.860847 | 0.174287  |
| H | 1.514520  | -2.436034 | -3.529609 | 0.185227  |
| H | 3.027498  | -3.361114 | -3.484538 | 0.192631  |
| H | 1.642453  | -3.869188 | -2.499062 | 0.194453  |

#### 14(Z)-c1δ

B3LYP/6-31G(d) energy= -1114.32250120

Zero-point correction (ZPC)= 0.452684

Number of Imaginary Frequencies=0

|   |           |           |           |           |
|---|-----------|-----------|-----------|-----------|
| O | -3.315512 | -0.523676 | 0.519397  | -0.486708 |
| C | -2.133475 | -1.189356 | 0.309152  | 0.374909  |
| C | -1.896913 | -2.052880 | 1.339835  | -0.199294 |
| C | -2.995802 | -1.909625 | 2.242417  | -0.209684 |
| C | -3.835154 | -0.973543 | 1.708427  | 0.364375  |
| C | -1.395539 | -0.855831 | -0.946097 | 0.038815  |
| N | -0.310011 | 0.191990  | -0.755062 | -0.441012 |
| C | 1.019838  | -0.470699 | -0.713577 | -0.091046 |
| C | 0.722918  | -1.851763 | -1.301720 | 0.609404  |
| N | -0.629552 | -1.968448 | -1.460834 | -0.445678 |
| C | -0.523981 | 1.490922  | -0.757058 | 0.407901  |
| C | 0.634010  | 2.445464  | -0.577686 | -0.378741 |
| C | 0.589167  | 3.188595  | 0.777126  | -0.458014 |
| C | 1.678803  | -0.546370 | 0.701277  | -0.370559 |
| C | 3.151985  | -0.182412 | 0.691868  | 0.147070  |
| C | 3.632346  | 0.839117  | 1.521024  | -0.199905 |
| C | 4.988790  | 1.171697  | 1.528023  | -0.126401 |
| C | 5.878812  | 0.486816  | 0.700947  | -0.124105 |
| C | 5.408353  | -0.535233 | -0.127394 | -0.129339 |
| C | 4.054938  | -0.871992 | -0.131984 | -0.196568 |
| O | 1.562545  | -2.687226 | -1.570270 | -0.475444 |
| C | -1.271722 | -3.155038 | -2.012593 | -0.340127 |
| C | -5.136464 | -0.394468 | 2.136204  | -0.534853 |
| C | -1.875468 | 2.005245  | -0.897389 | -0.187228 |
| C | -2.160117 | 3.285201  | -1.230060 | -0.054769 |

|   |           |           |           |           |
|---|-----------|-----------|-----------|-----------|
| C | -3.539372 | 3.819950  | -1.403824 | -0.512399 |
| H | -3.697011 | 4.678235  | -0.736837 | 0.205984  |
| H | 1.588692  | 1.926189  | -0.662757 | 0.206144  |
| H | 0.602242  | 3.174794  | -1.394646 | 0.199336  |
| H | 1.687353  | 0.043768  | -1.407510 | 0.227485  |
| H | -0.476622 | -3.844399 | -2.299804 | 0.227063  |
| H | -1.863977 | -2.892166 | -2.895768 | 0.183611  |
| H | -1.919211 | -3.629984 | -1.269747 | 0.190429  |
| H | -2.702365 | 1.325461  | -0.728414 | 0.200763  |
| H | -4.308853 | 3.069574  | -1.205594 | 0.187835  |
| H | -3.670966 | 4.203220  | -2.424681 | 0.208263  |
| H | -1.354324 | 3.994556  | -1.408990 | 0.180963  |
| H | 1.133474  | 0.116615  | 1.379800  | 0.166347  |
| H | 1.544504  | -1.562993 | 1.089085  | 0.199461  |
| H | 3.696923  | -1.677843 | -0.768111 | 0.175747  |
| H | 6.098331  | -1.078634 | -0.766597 | 0.156028  |
| H | 6.934240  | 0.743030  | 0.705185  | 0.155141  |
| H | 5.347451  | 1.961791  | 2.181635  | 0.149822  |
| H | 2.947567  | 1.367369  | 2.181296  | 0.125815  |
| H | 1.468058  | 3.834080  | 0.855642  | 0.198303  |
| H | -0.305893 | 3.807714  | 0.873400  | 0.172188  |
| H | 0.608839  | 2.488308  | 1.617354  | 0.178347  |
| H | -2.094272 | -0.480209 | -1.701609 | 0.203511  |
| H | -1.055644 | -2.724754 | 1.441985  | 0.176241  |
| H | -3.149955 | -2.447528 | 3.167152  | 0.176180  |
| H | -5.921618 | -0.587757 | 1.395876  | 0.192311  |
| H | -5.444338 | -0.839971 | 3.085071  | 0.194930  |
| H | -5.067672 | 0.691188  | 2.274338  | 0.181076  |

#### 14(Z)-c2δ

B3LYP/6-31G(d) energy= -1114.32413180

Zero-point correction (ZPC)= 0.452761

Number of Imaginary Frequencies=0

|   |           |           |           |           |
|---|-----------|-----------|-----------|-----------|
| O | -3.360883 | -0.548000 | 0.450983  | -0.487044 |
| C | -2.174829 | -1.183677 | 0.180666  | 0.375675  |
| C | -1.968311 | -2.186360 | 1.083652  | -0.199257 |
| C | -3.091291 | -2.166504 | 1.967584  | -0.208995 |
| C | -3.913730 | -1.159160 | 1.549356  | 0.363700  |
| C | -1.407049 | -0.681466 | -0.998177 | 0.041280  |
| N | -0.309780 | 0.308741  | -0.647696 | -0.440792 |
| C | 1.006580  | -0.375120 | -0.675026 | -0.089947 |
| C | 0.707441  | -1.637516 | -1.485456 | 0.608777  |
| N | -0.646330 | -1.717590 | -1.662875 | -0.446710 |
| C | -0.489398 | 1.597035  | -0.443370 | 0.408477  |
| C | 0.723828  | 2.478977  | -0.250799 | -0.384205 |
| C | 1.224400  | 3.074685  | -1.588457 | -0.461858 |
| C | 1.592373  | -0.701690 | 0.739370  | -0.370294 |
| C | 3.063957  | -0.357736 | 0.868209  | 0.145536  |
| C | 3.498509  | 0.525305  | 1.864914  | -0.196521 |
| C | 4.853482  | 0.838816  | 1.995536  | -0.127234 |
| C | 5.786745  | 0.273626  | 1.126632  | -0.124575 |
| C | 5.361297  | -0.609383 | 0.130757  | -0.129415 |
| C | 4.009485  | -0.926882 | 0.001382  | -0.195403 |
| O | 1.542126  | -2.426861 | -1.879411 | -0.476310 |
| C | -1.295293 | -2.801765 | -2.389278 | -0.340156 |
| C | -5.225322 | -0.639636 | 2.020128  | -0.534676 |
| C | -1.825565 | 2.156786  | -0.447070 | -0.182568 |
| C | -2.089304 | 3.481187  | -0.352688 | -0.054504 |
| C | -3.458530 | 4.065635  | -0.364080 | -0.513112 |
| H | -3.622925 | 4.657497  | 0.546484  | 0.207148  |
| H | 0.467159  | 3.285698  | 0.439247  | 0.191840  |
| H | 1.531910  | 1.919326  | 0.224433  | 0.211828  |
| H | 1.713370  | 0.232297  | -1.242136 | 0.223608  |
| H | -0.504853 | -3.455508 | -2.760306 | 0.226806  |

|   |           |           |           |          |
|---|-----------|-----------|-----------|----------|
| H | -1.869145 | -2.406396 | -3.234580 | 0.183370 |
| H | -1.961516 | -3.366960 | -1.731119 | 0.190398 |
| H | -2.665911 | 1.475465  | -0.508515 | 0.196193 |
| H | -4.239785 | 3.305394  | -0.441376 | 0.188776 |
| H | -3.561930 | 4.768125  | -1.202274 | 0.208796 |
| H | -1.273600 | 4.196365  | -0.267554 | 0.183185 |
| H | 1.013067  | -0.159944 | 1.493902  | 0.168720 |
| H | 1.436857  | -1.768692 | 0.936741  | 0.199270 |
| H | 3.684806  | -1.623654 | -0.767885 | 0.174194 |
| H | 6.085003  | -1.059053 | -0.543039 | 0.156264 |
| H | 6.840961  | 0.514542  | 1.227445  | 0.155311 |
| H | 5.176833  | 1.519509  | 2.777929  | 0.150683 |
| H | 2.777872  | 0.957632  | 2.556729  | 0.126907 |
| H | 2.097225  | 3.703731  | -1.394083 | 0.202591 |
| H | 1.524043  | 2.294961  | -2.295788 | 0.179355 |
| H | 0.456907  | 3.687930  | -2.068889 | 0.173488 |
| H | -2.088991 | -0.188856 | -1.700401 | 0.203175 |
| H | -1.131151 | -2.870403 | 1.111361  | 0.175301 |
| H | -3.271661 | -2.828759 | 2.802556  | 0.175762 |
| H | -5.990590 | -0.722199 | 1.239442  | 0.192180 |
| H | -5.559087 | -1.213300 | 2.887944  | 0.194735 |
| H | -5.158887 | 0.415141  | 2.312438  | 0.180224 |

#### TS13 (E)-a1-endo

B3LYP/6-31G(d) energy= -1118.884433

Zero-point correction (ZPC)= 0.526944

HF/6-31G(d)// B3LYP/6-31G(d) energy= -1111.5252500000

CPCM:HF/6-31G(d)// B3LYP/6-31G(d) (ε=78.39) energy= -1111.5902480000

Number of Imaginary Frequencies=1

|   |           |           |           |           |
|---|-----------|-----------|-----------|-----------|
| C | -3.628822 | -0.770079 | -1.038202 | -0.193669 |
| C | -2.327070 | -1.287774 | -0.952812 | 0.156308  |
| C | -2.083910 | -2.346040 | -0.066214 | -0.193421 |
| C | -3.106493 | -2.865460 | 0.730602  | -0.133420 |
| C | -4.393655 | -2.331201 | 0.649026  | -0.128220 |
| C | -4.651832 | -1.285853 | -0.240577 | -0.133695 |
| C | -1.206571 | -0.729149 | -1.804684 | -0.377132 |
| C | -0.571579 | 0.592549  | -1.284438 | -0.058941 |
| N | -0.104471 | 0.584187  | 0.117184  | -0.513321 |
| C | -0.847400 | 1.618115  | 0.949010  | 0.353880  |
| N | -1.725513 | 2.215953  | -0.066611 | -0.460843 |
| C | -1.596620 | 1.713032  | -1.322664 | 0.623677  |
| C | 0.981896  | -0.124924 | 0.495971  | 0.417358  |
| C | 1.301620  | -0.337795 | 1.962696  | -0.366182 |
| C | 0.701317  | -1.651068 | 2.514152  | -0.462320 |
| O | -2.204853 | 2.059602  | -2.320513 | -0.511766 |
| C | -2.692516 | 3.266273  | 0.224260  | -0.345718 |
| C | -1.696837 | 0.988517  | 2.063768  | -0.469389 |
| C | 0.107396  | 2.713635  | 1.464828  | -0.460837 |
| C | 1.781749  | -0.779529 | -0.464908 | -0.190759 |
| C | 2.869616  | -1.664169 | -0.197480 | -0.150705 |
| C | 3.097820  | -2.792926 | -1.195573 | -0.464519 |
| C | 4.557371  | -0.664274 | -0.380039 | -0.176949 |
| C | 4.650769  | 0.130704  | 0.785174  | -0.073759 |
| C | 4.044070  | 1.388032  | 0.561288  | -0.098107 |
| C | 3.681884  | 1.472230  | -0.766233 | -0.097751 |
| C | 4.249534  | 0.307955  | -1.510700 | -0.327839 |
| H | 3.878960  | 2.149310  | 1.315137  | 0.178701  |
| H | 5.064877  | -0.202512 | 1.731739  | 0.189064  |
| H | 5.242575  | -1.493144 | -0.531045 | 0.188542  |
| H | 3.183146  | 2.312090  | -1.237648 | 0.189037  |
| H | 3.640978  | -0.067771 | -2.334705 | 0.185523  |
| H | 5.212749  | 0.621251  | -1.948518 | 0.225589  |
| H | 2.982283  | -1.996474 | 0.830305  | 0.178274  |

|   |           |           |           |          |
|---|-----------|-----------|-----------|----------|
| H | 3.121566  | -2.430303 | -2.228396 | 0.171806 |
| H | 4.024359  | -3.338031 | -0.996931 | 0.178188 |
| H | 2.270895  | -3.508905 | -1.116883 | 0.192128 |
| H | 1.516788  | -0.673029 | -1.508388 | 0.157061 |
| H | 0.950063  | 0.489196  | 2.573410  | 0.173222 |
| H | 2.389214  | -0.357743 | 2.082635  | 0.166735 |
| H | 0.945322  | -1.744816 | 3.576999  | 0.180842 |
| H | -0.386314 | -1.666879 | 2.407351  | 0.187441 |
| H | 1.097444  | -2.528973 | 1.996111  | 0.165992 |
| H | -2.208207 | 4.160564  | 0.628247  | 0.175913 |
| H | -3.458404 | 2.920655  | 0.925106  | 0.182991 |
| H | -3.167523 | 3.519533  | -0.724652 | 0.224214 |
| H | -1.086270 | 0.562149  | 2.860797  | 0.166809 |
| H | -2.322560 | 1.760579  | 2.521176  | 0.176496 |
| H | -2.345493 | 0.211031  | 1.653437  | 0.203801 |
| H | -0.478523 | 3.524447  | 1.906451  | 0.185776 |
| H | 0.791842  | 2.362095  | 2.238119  | 0.168106 |
| H | 0.688922  | 3.126604  | 0.635156  | 0.165151 |
| H | 0.252401  | 0.875956  | -1.952076 | 0.179497 |
| H | -0.427521 | -1.486599 | -1.927507 | 0.157369 |
| H | -1.573262 | -0.479118 | -2.806474 | 0.204941 |
| H | -1.088877 | -2.783072 | -0.014172 | 0.119567 |
| H | -2.901790 | -3.694846 | 1.402202  | 0.144883 |
| H | -5.193447 | -2.737634 | 1.261376  | 0.152814 |
| H | -5.655862 | -0.879636 | -0.325706 | 0.153513 |
| H | -3.842045 | 0.031414  | -1.740049 | 0.167869 |

**TS13 (E)-a1-exo**

B3LYP/6-31G(d) energy= -1118.882975

Zero-point correction (ZPC)= 0.52697

HF/6-31G(d)// B3LYP/6-31G(d) energy= -1111.5236600000

CPCM:HF/6-31G(d)// B3LYP/6-31G(d) ( $\epsilon=78.39$ ) energy= -1111.5867580000

Number of Imaginary Frequencies=1

|   |           |           |           |           |
|---|-----------|-----------|-----------|-----------|
| C | -3.515628 | -0.647303 | -1.316790 | -0.193502 |
| C | -2.238203 | -1.200541 | -1.137464 | 0.155283  |
| C | -2.106790 | -2.331758 | -0.319988 | -0.193661 |
| C | -3.216134 | -2.887820 | 0.320809  | -0.133282 |
| C | -4.478879 | -2.317934 | 0.149168  | -0.128220 |
| C | -4.625245 | -1.199900 | -0.675085 | -0.134062 |
| C | -1.024599 | -0.603425 | -1.818789 | -0.376532 |
| C | -0.436690 | 0.667652  | -1.138058 | -0.060379 |
| N | -0.117302 | 0.547869  | 0.298872  | -0.509073 |
| C | -0.953967 | 1.511100  | 1.128235  | 0.353724  |
| N | -1.723364 | 2.189850  | 0.075749  | -0.459522 |
| C | -1.448359 | 1.798815  | -1.196396 | 0.622000  |
| C | 0.942033  | -0.175312 | 0.729663  | 0.400694  |
| C | 1.096664  | -0.502452 | 2.205864  | -0.365971 |
| C | 0.473225  | -1.870099 | 2.564737  | -0.461055 |
| O | -1.939285 | 2.235540  | -2.223286 | -0.512809 |
| C | -2.722255 | 3.215592  | 0.345797  | -0.345759 |
| C | -1.912956 | 0.793793  | 2.091202  | -0.469862 |
| C | -0.068256 | 2.562124  | 1.828488  | -0.462059 |
| C | 1.834080  | -0.754383 | -0.196289 | -0.180594 |
| C | 2.949546  | -1.588155 | 0.107373  | -0.148031 |
| C | 3.241134  | -2.763753 | -0.810832 | -0.461343 |
| C | 4.605575  | -0.495646 | -0.003505 | -0.196561 |
| C | 4.229458  | 0.800886  | 0.695366  | -0.335625 |
| C | 3.678388  | 1.614157  | -0.429916 | -0.095694 |
| C | 4.080396  | 1.069858  | -1.629094 | -0.100493 |
| C | 4.720986  | -0.165796 | -1.371622 | -0.050647 |
| H | -3.562092 | 2.812902  | 0.920187  | 0.183405  |
| H | -2.292289 | 4.067355  | 0.881493  | 0.175702  |
| H | -3.085957 | 3.555145  | -0.625084 | 0.223808  |

|   |           |           |           |          |
|---|-----------|-----------|-----------|----------|
| H | -2.508393 | 0.052973  | 1.552519  | 0.204469 |
| H | -2.589683 | 1.526716  | 2.540239  | 0.176367 |
| H | -1.388499 | 0.302542  | 2.911692  | 0.167613 |
| H | -0.704919 | 3.330864  | 2.275027  | 0.186294 |
| H | 0.539998  | 2.149946  | 2.634430  | 0.170479 |
| H | 0.455471  | 0.987202  | -1.691633 | 0.179720 |
| H | -1.275309 | -0.277217 | -2.834412 | 0.204047 |
| H | -0.244641 | -1.364425 | -1.909254 | 0.157654 |
| H | -3.641125 | 0.212298  | -1.969229 | 0.167822 |
| H | -5.608220 | -0.764482 | -0.831652 | 0.153315 |
| H | -5.345248 | -2.752317 | 0.639616  | 0.152840 |
| H | -3.096853 | -3.772785 | 0.940000  | 0.145392 |
| H | -1.130352 | -2.796772 | -0.201562 | 0.120998 |
| H | -0.587154 | -1.907246 | 2.301737  | 0.186837 |
| H | 0.976426  | -2.689105 | 2.042963  | 0.164859 |
| H | 0.568172  | -2.043045 | 3.641348  | 0.181834 |
| H | 2.158310  | -0.519571 | 2.465514  | 0.169286 |
| H | 0.650765  | 0.262293  | 2.834507  | 0.174580 |
| H | 0.587704  | 3.046388  | 1.098605  | 0.164412 |
| H | 2.531941  | -3.571743 | -0.592275 | 0.187887 |
| H | 4.248846  | -3.163883 | -0.662655 | 0.173489 |
| H | 3.121652  | -2.496025 | -1.864850 | 0.170144 |
| H | 3.922280  | 1.502243  | -2.610519 | 0.187000 |
| H | 5.163901  | -0.802549 | -2.129997 | 0.193235 |
| H | 3.087190  | -1.838320 | 1.157729  | 0.178825 |
| H | 5.292844  | -1.200282 | 0.457629  | 0.189831 |
| H | 1.633251  | -0.621780 | -1.250276 | 0.159011 |
| H | 3.148777  | 2.551916  | -0.303082 | 0.186608 |
| H | 5.165926  | 1.274067  | 1.036640  | 0.224203 |
| H | 3.585076  | 0.720141  | 1.571298  | 0.180759 |

**TS13 (E)-a2-endo**

B3LYP/6-31G(d) energy= -1118.878289

Zero-point correction (ZPC)= 0.526985

HF/6-31G(d)// B3LYP/6-31G(d) energy= -1111.5172010000

CPCM:HF/6-31G(d)// B3LYP/6-31G(d) ( $\epsilon=78.39$ ) energy= -1111.5823640000

Number of Imaginary Frequencies=1

|   |           |           |           |           |
|---|-----------|-----------|-----------|-----------|
| C | -2.751085 | -2.052045 | -1.464869 | -0.101645 |
| C | -3.943456 | -1.325883 | -1.226665 | -0.073711 |
| C | -4.194573 | -1.237986 | 0.162999  | -0.178408 |
| C | -3.477807 | 0.460954  | 0.753873  | -0.153963 |
| C | -2.046224 | 0.453150  | 0.805627  | -0.188253 |
| C | -2.304709 | -2.565482 | -0.269186 | -0.085529 |
| C | -3.305364 | -2.295175 | 0.804087  | -0.338208 |
| C | -1.179207 | 1.039118  | -0.138005 | 0.412214  |
| C | -1.788190 | 1.602205  | -1.411945 | -0.376108 |
| C | -2.510271 | 2.962535  | -1.271791 | -0.458560 |
| C | -4.182003 | 0.622716  | 2.099178  | -0.462509 |
| N | 0.155270  | 1.107344  | 0.095244  | -0.519223 |
| C | 0.739866  | 0.579378  | 1.348641  | -0.068767 |
| C | 2.113338  | 1.219973  | 1.414934  | 0.627855  |
| N | 2.324697  | 1.887113  | 0.249987  | -0.461928 |
| C | 1.203623  | 1.876513  | -0.702880 | 0.358449  |
| O | 2.885771  | 1.105394  | 2.350755  | -0.510412 |
| C | 3.605243  | 2.526478  | -0.022544 | -0.344554 |
| C | 0.872257  | -0.965414 | 1.489613  | -0.371349 |
| C | 1.842844  | -1.665299 | 0.558782  | 0.154208  |
| C | 1.422602  | -2.172274 | -0.679469 | -0.211325 |
| C | 2.309601  | -2.849195 | -1.519390 | -0.128835 |
| C | 3.637747  | -3.029369 | -1.129708 | -0.126911 |
| C | 4.069635  | -2.527946 | 0.099691  | -0.129657 |
| C | 3.180536  | -1.853379 | 0.937607  | -0.179654 |
| C | 0.804704  | 3.332821  | -0.993799 | -0.466676 |

|   |           |           |           |           |
|---|-----------|-----------|-----------|-----------|
| C | 1.607178  | 1.132466  | -1.987760 | -0.470149 |
| H | 0.153060  | 0.950313  | 2.196436  | 0.193098  |
| H | 1.195816  | -1.113568 | 2.525364  | 0.196646  |
| H | -0.119159 | -1.416692 | 1.398646  | 0.147190  |
| H | 0.391557  | -2.028746 | -0.993909 | 0.107928  |
| H | 1.963428  | -3.240323 | -2.472421 | 0.140446  |
| H | 4.328941  | -3.561892 | -1.776517 | 0.153757  |
| H | 5.100133  | -2.668823 | 0.413056  | 0.156416  |
| H | 3.524092  | -1.465515 | 1.891983  | 0.170240  |
| H | 4.046848  | 2.148209  | -0.949198 | 0.178952  |
| H | 4.259464  | 2.276625  | 0.813962  | 0.223355  |
| H | 3.512707  | 3.615512  | -0.082382 | 0.179413  |
| H | 1.697372  | 3.880909  | -1.306248 | 0.184803  |
| H | 0.407889  | 3.817229  | -0.097141 | 0.175532  |
| H | 0.088003  | 3.420616  | -1.808904 | 0.172446  |
| H | 1.976394  | 0.132497  | -1.755088 | 0.202446  |
| H | 2.397901  | 1.689968  | -2.499060 | 0.175648  |
| H | 0.772603  | 1.045283  | -2.687535 | 0.162397  |
| H | -2.513534 | 0.860044  | -1.769848 | 0.169051  |
| H | -1.037176 | 1.672929  | -2.196541 | 0.177846  |
| H | -1.847754 | 3.742989  | -0.894972 | 0.178972  |
| H | -2.878068 | 3.276665  | -2.253748 | 0.181153  |
| H | -3.366116 | 2.912561  | -0.595439 | 0.169007  |
| H | -3.969394 | 1.624008  | 2.491059  | 0.193542  |
| H | -3.928382 | 1.079628  | -0.014116 | 0.175767  |
| H | -3.825200 | -0.101606 | 2.838730  | 0.172268  |
| H | -5.267165 | 0.524331  | 2.011346  | 0.176043  |
| H | -4.551910 | -0.859724 | -1.995721 | 0.190922  |
| H | -5.215798 | -1.102341 | 0.507714  | 0.190481  |
| H | -3.912651 | -3.205023 | 0.947739  | 0.226285  |
| H | -2.879021 | -2.053899 | 1.780352  | 0.191344  |
| H | -1.407008 | -3.156516 | -0.127339 | 0.201606  |
| H | -2.276340 | -2.182029 | -2.430706 | 0.182939  |
| H | -1.625176 | 0.068878  | 1.725674  | 0.155655  |

**TS13 (E)-a2-exo**

B3LYP/6-31G(d) energy= -1118.876893

Zero-point correction (ZPC)= 0.526794

HF/6-31G(d)// B3LYP/6-31G(d) energy= -1111.5169800000

CPCM:HF/6-31G(d)// B3LYP/6-31G(d) ( $\epsilon=78.39$ ) energy= -

1111.5822790000

Number of Imaginary Frequencies=1

|   |           |           |           |           |
|---|-----------|-----------|-----------|-----------|
| C | -2.088604 | 2.790093  | -1.790903 | -0.129804 |
| C | -1.224821 | 2.125766  | -0.917461 | -0.208408 |
| C | -1.625788 | 1.792244  | 0.384634  | 0.155476  |
| C | -2.922210 | 2.140562  | 0.791631  | -0.181662 |
| C | -3.789045 | 2.802641  | -0.079198 | -0.129546 |
| C | -3.375613 | 3.131421  | -1.371615 | -0.127481 |
| C | -0.677108 | 1.101498  | 1.342918  | -0.376384 |
| C | -0.690657 | -0.452733 | 1.339067  | -0.066124 |
| N | -0.277839 | -1.132665 | 0.091379  | -0.518537 |
| C | -1.452373 | -1.894090 | -0.517901 | 0.357585  |
| N | -2.471322 | -1.718974 | 0.529377  | -0.462266 |
| C | -2.099538 | -0.954774 | 1.589332  | 0.627970  |
| C | 1.027253  | -1.178745 | -0.284106 | 0.404637  |
| C | 1.438720  | -1.889295 | -1.567310 | -0.379428 |
| C | 2.106099  | -3.269667 | -1.371942 | -0.456543 |
| O | -2.769638 | -0.673116 | 2.568053  | -0.512051 |
| C | -3.819740 | -2.263959 | 0.440519  | -0.345065 |
| C | -1.940630 | -1.257019 | -1.831186 | -0.470959 |
| C | -1.181350 | -3.399322 | -0.680202 | -0.465318 |
| C | 2.027250  | -0.616824 | 0.531720  | -0.185263 |
| C | 2.500554  | 2.549606  | -0.448983 | -0.082113 |
| C | 3.291036  | 1.592100  | -1.278294 | -0.346345 |
| C | 4.233574  | 0.966132  | -0.259707 | -0.200119 |

|   |           |           |           |           |
|---|-----------|-----------|-----------|-----------|
| C | 3.438512  | -0.716032 | 0.310355  | -0.149209 |
| C | 4.201843  | 1.826332  | 0.861076  | -0.046118 |
| C | 3.098679  | 2.712867  | 0.776453  | -0.103323 |
| C | 4.297904  | -1.124731 | 1.499420  | -0.460115 |
| H | 1.619743  | 3.076444  | -0.797546 | 0.200640  |
| H | 1.738527  | -0.206284 | 1.491530  | 0.154703  |
| H | 3.901673  | 2.166395  | -1.995183 | 0.223159  |
| H | 2.684724  | 0.903384  | -1.870935 | 0.188995  |
| H | 5.183202  | 0.546851  | -0.583972 | 0.193384  |
| H | 2.788352  | 3.404395  | 1.551161  | 0.190962  |
| H | 4.890751  | 1.779123  | 1.698034  | 0.196648  |
| H | 3.728623  | -1.235221 | -0.599572 | 0.177631  |
| H | 4.158269  | -2.196458 | 1.685173  | 0.189327  |
| H | 4.007575  | -0.594114 | 2.411051  | 0.171171  |
| H | 5.364361  | -0.957286 | 1.318497  | 0.170610  |
| H | 2.141872  | -1.238311 | -2.099425 | 0.173451  |
| H | 0.586882  | -1.992064 | -2.235056 | 0.178093  |
| H | 2.279253  | -3.729544 | -2.350086 | 0.181934  |
| H | 3.070708  | -3.193980 | -0.864739 | 0.165666  |
| H | -0.060005 | -0.803568 | 2.164199  | 0.192215  |
| H | -4.351723 | -1.913885 | 1.326309  | 0.223409  |
| H | -4.337138 | -1.902068 | -0.453180 | 0.179629  |
| H | -3.817240 | -3.358317 | 0.440829  | 0.178699  |
| H | -2.824762 | -1.795089 | -2.186256 | 0.175611  |
| H | -2.203837 | -0.209320 | -1.677623 | 0.202772  |
| H | -1.191579 | -1.317346 | -2.623738 | 0.165403  |
| H | -2.133829 | -3.908293 | -0.849291 | 0.183623  |
| H | -0.731911 | -3.815589 | 0.225811  | 0.174721  |
| H | -0.552906 | -3.627700 | -1.539820 | 0.173072  |
| H | -0.227473 | 1.854583  | -1.256526 | 0.105018  |
| H | 0.344448  | 1.448156  | 1.171102  | 0.152164  |
| H | -0.939174 | 1.370122  | 2.371769  | 0.195180  |
| H | -1.756474 | 3.044319  | -2.793988 | 0.141476  |
| H | -4.048498 | 3.654268  | -2.045058 | 0.153762  |
| H | -4.787153 | 3.068785  | 0.256904  | 0.156193  |
| H | -3.251853 | 1.887742  | 1.795197  | 0.169663  |
| H | 1.484149  | -3.948167 | -0.785176 | 0.177570  |

**TS13 (E)-c1-endo**

B3LYP/6-31G(d) energy= -1118.883265

Zero-point correction (ZPC)= 0.526479

HF/6-31G(d)//B3LYP/6-31G(d) energy= -1111.5236240000

CPCM:HF/6-31G(d)// B3LYP/6-31G(d) ( $\epsilon=78.39$ ) energy= -

1111.5836300000

Number of Imaginary Frequencies=1

|   |           |           |           |           |
|---|-----------|-----------|-----------|-----------|
| C | 1.166813  | 2.787001  | -1.880562 | -0.331055 |
| C | -0.125752 | 2.207013  | -2.354201 | -0.097173 |
| C | -1.161680 | 3.048753  | -2.007883 | -0.099904 |
| C | -0.656755 | 4.060366  | -1.158892 | -0.072832 |
| C | 0.693914  | 3.793301  | -0.840903 | -0.177996 |
| C | 0.628890  | 2.715285  | 0.813982  | -0.153998 |
| C | 2.049423  | 2.899941  | 1.332207  | -0.466460 |
| C | 0.233534  | 1.387922  | 0.468264  | -0.195314 |
| C | -1.064262 | 0.850303  | 0.592357  | 0.406725  |
| C | -2.155238 | 1.725154  | 1.176810  | -0.366635 |
| C | -2.089466 | 1.796215  | 2.719238  | -0.456443 |
| N | -1.291974 | -0.452210 | 0.306247  | -0.521672 |
| C | -2.636866 | -1.127266 | 0.115255  | 0.351094  |
| N | -2.218966 | -2.445549 | -0.380707 | -0.461453 |
| C | -0.883067 | -2.590883 | -0.597278 | 0.601177  |
| C | -0.182776 | -1.334862 | -0.110052 | -0.056271 |
| C | -3.407880 | -1.293499 | 1.433939  | -0.459725 |
| C | -3.468981 | -0.433619 | -0.982793 | -0.459421 |
| C | 0.838791  | -1.672509 | 1.025366  | -0.367428 |

|   |           |           |           |           |
|---|-----------|-----------|-----------|-----------|
| C | 2.290195  | -1.609689 | 0.585678  | 0.144171  |
| C | 3.214712  | -0.844930 | 1.310066  | -0.201067 |
| C | 4.556345  | -0.790367 | 0.924870  | -0.131996 |
| C | 4.988857  | -1.498698 | -0.196687 | -0.127930 |
| C | 4.075762  | -2.267108 | -0.922821 | -0.132445 |
| C | 2.736772  | -2.327012 | -0.534951 | -0.198050 |
| O | -0.321766 | -3.568658 | -1.061242 | -0.495562 |
| C | -3.152844 | -3.514586 | -0.711541 | -0.346413 |
| H | -2.194997 | 2.947201  | -2.319597 | 0.177173  |
| H | 1.607399  | 3.358900  | -2.715333 | 0.224509  |
| H | -1.238087 | 4.883514  | -0.755122 | 0.187891  |
| H | 1.345146  | 4.594637  | -0.505540 | 0.188130  |
| H | -0.090650 | 3.310872  | 1.368152  | 0.175558  |
| H | 2.785572  | 2.380922  | 0.710975  | 0.181284  |
| H | 2.327849  | 3.954447  | 1.405829  | 0.174450  |
| H | 2.113268  | 2.472593  | 2.340371  | 0.189081  |
| H | -0.202864 | 1.330751  | -2.988768 | 0.188802  |
| H | 1.920925  | 2.063905  | -1.566068 | 0.196106  |
| H | 1.036813  | 0.731232  | 0.160575  | 0.177195  |
| H | -2.879582 | -0.344591 | -1.900270 | 0.167330  |
| H | 2.887292  | -0.303510 | 2.195540  | 0.124989  |
| H | 4.408917  | -2.832880 | -1.788472 | 0.151967  |
| H | 6.032020  | -1.461167 | -0.497256 | 0.150675  |
| H | 5.261864  | -0.202230 | 1.505504  | 0.144486  |
| H | 2.034574  | -2.946446 | -1.087218 | 0.178020  |
| H | 0.342769  | -0.884151 | -0.961330 | 0.186516  |
| H | 0.609412  | -2.677064 | 1.399555  | 0.200180  |
| H | 0.675726  | -0.984182 | 1.860199  | 0.161583  |
| H | -2.551803 | -4.346304 | -1.081928 | 0.226817  |
| H | -3.856138 | -3.210821 | -1.493433 | 0.177203  |
| H | -3.711013 | -3.843210 | 0.170075  | 0.182092  |
| H | -2.898867 | 2.431299  | 3.092486  | 0.183648  |
| H | -2.200835 | 0.805464  | 3.168950  | 0.176043  |
| H | -1.140709 | 2.212802  | 3.067734  | 0.169900  |
| H | -2.049020 | 2.732948  | 0.762275  | 0.169243  |
| H | -3.145050 | 1.386926  | 0.883034  | 0.171746  |
| H | -4.353818 | -1.037183 | -1.203430 | 0.186048  |
| H | -3.825237 | 0.556051  | -0.693586 | 0.170299  |
| H | -4.285138 | -1.924715 | 1.265582  | 0.182491  |
| H | -3.769893 | -0.344115 | 1.829900  | 0.172924  |
| H | -2.775785 | -1.775687 | 2.184959  | 0.179966  |

### TS13 (E)-c1-exo

B3LYP/6-31G(d) energy= -1118.882084

Zero-point correction (ZPC)= 0.526418

HF/6-31G(d)// B3LYP/6-31G(d) energy= -1111.5225730000

CPCM:HF/6-31G(d)// B3LYP/6-31G(d) ( $\epsilon=78.39$ ) energy= -1111.5820940000

Number of Imaginary Frequencies=1

|   |           |           |           |           |
|---|-----------|-----------|-----------|-----------|
| C | 2.970507  | -0.130384 | -0.005058 | 0.350606  |
| N | 1.491317  | 0.092919  | -0.258315 | -0.518126 |
| C | 0.700558  | -1.106451 | 0.084651  | -0.057151 |
| C | 1.735745  | -2.085588 | 0.608126  | 0.599847  |
| N | 2.966716  | -1.525144 | 0.457084  | -0.461027 |
| C | 0.875262  | 1.266980  | -0.533075 | 0.390198  |
| C | 1.668530  | 2.455796  | -1.048307 | -0.366652 |
| C | 1.639680  | 2.546154  | -2.590509 | -0.454740 |
| C | -0.090642 | -1.730228 | -1.112869 | -0.368861 |
| C | -1.512734 | -2.132177 | -0.766380 | 0.145609  |
| C | -1.779178 | -2.964095 | 0.332164  | -0.198746 |
| C | -3.090249 | -3.332769 | 0.636440  | -0.134552 |
| C | -4.152149 | -2.885306 | -0.153244 | -0.129025 |
| C | -3.895904 | -2.067717 | -1.254613 | -0.133349 |
| C | -2.584231 | -1.692894 | -1.555863 | -0.199795 |

|   |           |           |           |           |
|---|-----------|-----------|-----------|-----------|
| O | 1.488594  | -3.198129 | 1.041694  | -0.496600 |
| C | 4.173885  | -2.252431 | 0.828637  | -0.346065 |
| C | 3.812505  | -0.013816 | -1.285439 | -0.459951 |
| C | 3.491447  | 0.759937  | 1.141905  | -0.459744 |
| C | -0.530844 | 1.350016  | -0.490581 | -0.185671 |
| C | -1.316039 | 2.503088  | -0.776134 | -0.149327 |
| C | -1.911946 | 3.293616  | 0.966727  | -0.197561 |
| C | -0.665263 | 3.229757  | 1.833387  | -0.334929 |
| C | -0.790193 | 1.878848  | 2.461430  | -0.097684 |
| C | -2.083916 | 1.428899  | 2.330455  | -0.096176 |
| C | -2.792261 | 2.328378  | 1.496233  | -0.048205 |
| C | -2.616495 | 2.322953  | -1.540188 | -0.467655 |
| H | -0.774676 | 3.990849  | 2.624560  | 0.223122  |
| H | 0.288315  | 3.428532  | 1.341787  | 0.178270  |
| H | -0.772714 | 3.396196  | -1.079861 | 0.175737  |
| H | -2.283149 | 4.241176  | 0.585619  | 0.188846  |
| H | -3.155608 | 1.427630  | -1.218292 | 0.180519  |
| H | -3.276980 | 3.190407  | -1.445239 | 0.170954  |
| H | -2.385310 | 2.204237  | -2.606506 | 0.184773  |
| H | -3.842034 | 2.235558  | 1.239670  | 0.193217  |
| H | -2.493744 | 0.526164  | 2.768499  | 0.190056  |
| H | -1.095554 | 0.447310  | -0.301462 | 0.179734  |
| H | -0.003856 | 1.396188  | 3.031356  | 0.184339  |
| H | 2.701879  | 2.428750  | -0.714429 | 0.173184  |
| H | 1.246378  | 3.375152  | -0.632369 | 0.172668  |
| H | 2.041192  | 1.639592  | -3.052470 | 0.175390  |
| H | 0.622579  | 2.688944  | -2.965242 | 0.168975  |
| H | 2.247806  | 3.394088  | -2.920706 | 0.184330  |
| H | 0.009186  | -0.862132 | 0.900915  | 0.187824  |
| H | 0.464521  | -2.607348 | -1.465161 | 0.200738  |
| H | -3.280760 | -3.983697 | 1.485312  | 0.151619  |
| H | -0.953130 | -3.337679 | 0.932339  | 0.177831  |
| H | -2.390068 | -1.068210 | -2.425584 | 0.127346  |
| H | -4.713108 | -1.728868 | -1.885687 | 0.144892  |
| H | -5.170436 | -3.182181 | 0.081243  | 0.150382  |
| H | 3.851879  | -3.246920 | 1.140843  | 0.226316  |
| H | 4.856597  | -2.348209 | -0.020661 | 0.181735  |
| H | 4.697087  | -1.772687 | 1.662009  | 0.177657  |
| H | 3.864598  | 1.008611  | -1.661217 | 0.173985  |
| H | 3.403542  | -0.660076 | -2.067233 | 0.179768  |
| H | 4.838609  | -0.331021 | -1.078387 | 0.182365  |
| H | 4.516487  | 0.469991  | 1.389149  | 0.186527  |
| H | 3.514128  | 1.821022  | 0.891032  | 0.172483  |
| H | 2.873847  | 0.619960  | 2.034195  | 0.167108  |
| H | -0.098927 | -1.014126 | -1.940311 | 0.162587  |

### TS13 (E)-c2-endo

B3LYP/6-31G(d) energy= -1118.87978

Zero-point correction (ZPC)= 0.527203

HF/6-31G(d)// B3LYP/6-31G(d) energy= -1111.5190240000

CPCM:HF/6-31G(d)// B3LYP/6-31G(d) ( $\epsilon=78.39$ ) energy= -1111.5812830000

Number of Imaginary Frequencies=1

|   |           |           |           |           |
|---|-----------|-----------|-----------|-----------|
| C | 2.700487  | 1.897125  | -0.943249 | -0.206388 |
| C | 1.454480  | 2.246916  | -0.403442 | 0.156055  |
| C | 1.398618  | 3.280985  | 0.542905  | -0.195169 |
| C | 2.566105  | 3.928588  | 0.950473  | -0.130792 |
| C | 3.803014  | 3.563783  | 0.415390  | -0.125896 |
| C | 3.867493  | 2.549815  | -0.540879 | -0.130183 |
| C | 0.197489  | 1.538485  | -0.878928 | -0.374012 |
| C | -0.812092 | 1.183809  | 0.260797  | -0.071200 |
| N | -1.460978 | -0.140521 | 0.136496  | -0.520306 |
| C | -2.895522 | 0.011829  | -0.332680 | 0.351981  |
| N | -3.082207 | 1.462303  | -0.178959 | -0.458083 |

|   |           |           |           |           |
|---|-----------|-----------|-----------|-----------|
| C | -1.981952 | 2.151568  | 0.227967  | 0.604879  |
| C | -0.782553 | -1.276851 | 0.422306  | 0.409750  |
| C | -1.465038 | -2.631587 | 0.410083  | -0.372844 |
| C | -1.960038 | -3.112946 | 1.792963  | -0.457610 |
| C | -3.017711 | -0.392644 | -1.813618 | -0.449581 |
| C | -3.938036 | -0.696963 | 0.547032  | -0.469175 |
| C | -4.351269 | 2.141244  | -0.408741 | -0.345265 |
| O | -1.914222 | 3.346143  | 0.460978  | -0.493788 |
| C | 0.575516  | -1.215067 | 0.792901  | -0.198820 |
| C | 1.348185  | -2.293851 | 1.330719  | -0.153773 |
| C | 2.392248  | -1.904522 | 2.373218  | -0.465155 |
| C | 2.473702  | -3.088153 | -0.045317 | -0.177408 |
| C | 2.867220  | -1.914397 | -0.931337 | -0.339025 |
| C | 1.793985  | -1.934061 | -1.968952 | -0.093071 |
| C | 1.146547  | -3.148227 | -1.947394 | -0.099631 |
| C | 1.614421  | -3.887935 | -0.835118 | -0.076303 |
| H | 0.396671  | -3.482944 | -2.655074 | 0.179986  |
| H | 1.312402  | -4.901531 | -0.589362 | 0.190109  |
| H | 1.636014  | -1.146564 | -2.697466 | 0.189665  |
| H | 3.821968  | -2.173190 | -1.420728 | 0.222121  |
| H | 3.020491  | -0.951675 | -0.440450 | 0.199919  |
| H | 3.209596  | -3.564588 | 0.595966  | 0.189559  |
| H | 0.798106  | -3.184116 | 1.618960  | 0.175754  |
| H | 3.040645  | -1.095713 | 2.021299  | 0.180012  |
| H | 1.877302  | -1.545184 | 3.271790  | 0.192590  |
| H | 3.016885  | -2.752437 | 2.666698  | 0.174701  |
| H | 1.073059  | -0.252475 | 0.780704  | 0.174711  |
| H | 2.756808  | 1.126803  | -1.710198 | 0.113566  |
| H | 4.822251  | 2.270391  | -0.977994 | 0.143715  |
| H | 4.707972  | 4.073862  | 0.732419  | 0.152693  |
| H | 2.505338  | 4.729886  | 1.681464  | 0.155043  |
| H | 0.437015  | 3.598327  | 0.937371  | 0.180074  |
| H | -0.321882 | 2.164969  | -1.615190 | 0.195917  |
| H | 0.472128  | 0.616526  | -1.400036 | 0.148942  |
| H | -0.320728 | 1.247305  | 1.235805  | 0.202915  |
| H | -4.930627 | -0.338781 | 0.261021  | 0.186434  |
| H | -3.949810 | -1.777851 | 0.417325  | 0.173710  |
| H | -3.782684 | -0.454237 | 1.601698  | 0.181147  |
| H | -2.308982 | 0.174117  | -2.423745 | 0.173886  |
| H | -4.028589 | -0.186260 | -2.177769 | 0.181806  |
| H | -2.830420 | -1.460261 | -1.956906 | 0.164751  |
| H | -4.775907 | 1.859596  | -1.376822 | 0.175312  |
| H | -5.078176 | 1.928459  | 0.381794  | 0.183900  |
| H | -4.138729 | 3.211336  | -0.407001 | 0.224374  |
| H | -2.289655 | -2.644621 | -0.301588 | 0.173743  |
| H | -0.740701 | -3.359078 | 0.028632  | 0.170045  |
| H | -2.433600 | -4.094263 | 1.688670  | 0.181373  |
| H | -2.691403 | -2.429505 | 2.228202  | 0.177767  |
| H | -1.138485 | -3.209596 | 2.507331  | 0.170562  |

### TS13 (E)-c2-exo

B3LYP/6-31G(d) energy= -1118.875654

Zero-point correction (ZPC)= 0.526898

HF/6-31G(d)// B3LYP/6-31G(d) energy= -1111.5157510000

CPCM:HF/6-31G(d)// B3LYP/6-31G(d) ( $\epsilon=78.39$ ) energy= -1111.5798670000

Number of Imaginary Frequencies=1

|   |          |          |           |           |
|---|----------|----------|-----------|-----------|
| C | 1.412538 | 3.018564 | 0.874440  | -0.191873 |
| C | 1.427741 | 2.217605 | -0.274793 | 0.159590  |
| C | 2.608634 | 2.154815 | -1.030886 | -0.198082 |
| C | 3.750678 | 2.854470 | -0.642965 | -0.132991 |
| C | 3.732589 | 3.628031 | 0.519879  | -0.126124 |
| C | 2.560548 | 3.710620 | 1.270363  | -0.133763 |
| C | 0.207785 | 1.454213 | -0.767931 | -0.364844 |

|   |           |           |           |           |
|---|-----------|-----------|-----------|-----------|
| C | -0.823407 | 1.048936  | 0.325170  | -0.082419 |
| N | -1.546787 | -0.210503 | 0.034254  | -0.515330 |
| C | -2.946159 | 0.093415  | -0.475048 | 0.351399  |
| N | -3.052920 | 1.522307  | -0.143418 | -0.457680 |
| C | -1.935752 | 2.080850  | 0.398289  | 0.607339  |
| C | -0.956332 | -1.415704 | 0.219673  | 0.401616  |
| C | -1.739857 | -2.701794 | 0.008164  | -0.377278 |
| C | -2.350028 | -3.294744 | 1.297944  | -0.455743 |
| O | -1.818457 | 3.221940  | 0.808879  | -0.489896 |
| C | -4.271401 | 2.303650  | -0.314362 | -0.345114 |
| C | -4.079677 | -0.644054 | 0.256441  | -0.470663 |
| C | -3.011767 | -0.114441 | -1.999595 | -0.450214 |
| C | 0.369294  | -1.492158 | 0.692541  | -0.191239 |
| C | 1.012430  | -2.681193 | 1.154180  | -0.147666 |
| C | 1.812039  | -2.590911 | 2.444989  | -0.462296 |
| C | 2.126007  | -1.828074 | -1.938644 | -0.095331 |
| C | 3.175753  | -1.420871 | -1.151504 | -0.090727 |
| C | 3.369994  | -2.381897 | -0.127370 | -0.049306 |
| C | 2.340763  | -3.344421 | -0.158572 | -0.199433 |
| C | 1.679197  | -3.189362 | -1.519192 | -0.340477 |
| H | 0.418076  | -3.590557 | 1.101985  | 0.177939  |
| H | 2.463595  | -3.458268 | 2.590167  | 0.171343  |
| H | 1.114880  | -2.557571 | 3.291213  | 0.188292  |
| H | 2.419442  | -1.682136 | 2.484045  | 0.176079  |
| H | 2.490663  | -4.328573 | 0.277863  | 0.189735  |
| H | 2.134259  | -3.932421 | -2.195832 | 0.223282  |
| H | 0.910439  | -0.570338 | 0.871060  | 0.169819  |
| H | 1.728994  | -1.296384 | -2.796455 | 0.186762  |
| H | 3.748885  | -0.509613 | -1.266952 | 0.188628  |
| H | 4.156836  | -2.337074 | 0.618041  | 0.194659  |
| H | 0.601359  | -3.351518 | -1.567752 | 0.183172  |
| H | -2.241573 | 0.478672  | -2.500022 | 0.174871  |
| H | -3.969322 | -0.546099 | 1.339681  | 0.181129  |
| H | -4.159332 | -1.696188 | -0.011163 | 0.174823  |
| H | -5.027733 | -0.180089 | -0.028285 | 0.187161  |
| H | -3.988967 | 0.197769  | -2.380354 | 0.181760  |
| H | -2.876686 | -1.165265 | -2.270526 | 0.166441  |
| H | -5.034662 | 2.040459  | 0.425126  | 0.183367  |
| H | -4.681787 | 2.174578  | -1.320188 | 0.175279  |
| H | -3.995178 | 3.349184  | -0.170318 | 0.224211  |
| H | -0.341486 | 0.966581  | 1.302871  | 0.197816  |
| H | -0.315999 | 2.049885  | -1.527853 | 0.188040  |
| H | 2.624823  | 1.572996  | -1.950904 | 0.114566  |
| H | 0.542685  | 0.543393  | -1.274536 | 0.152741  |
| H | 0.494289  | 3.143710  | 1.439618  | 0.171144  |
| H | 2.528471  | 4.328547  | 2.163282  | 0.152603  |
| H | 4.620167  | 4.172994  | 0.827916  | 0.151152  |
| H | 4.650684  | 2.801264  | -1.249778 | 0.143400  |
| H | -3.013835 | -2.590584 | 1.802376  | 0.177677  |
| H | -2.929597 | -4.189525 | 1.049751  | 0.183000  |
| H | -1.574796 | -3.583328 | 2.012496  | 0.168225  |
| H | -1.064019 | -3.446482 | -0.420436 | 0.173291  |
| H | -2.517633 | -2.559428 | -0.740294 | 0.176291  |

### TS13 (Z)-a1-endo

B3LYP/6-31G(d) energy= -1118.878187

Zero-point correction (ZPC)= 0.526845

HF/6-31G(d)// B3LYP/6-31G(d) energy= -1111.5167980000

CPCM:HF/6-31G(d)// B3LYP/6-31G(d) ( $\epsilon=78.39$ ) energy= -1111.5837480000

Number of Imaginary Frequencies=1

|   |           |          |           |           |
|---|-----------|----------|-----------|-----------|
| C | -4.190606 | 1.002896 | 1.335627  | -0.098551 |
| C | -3.980037 | 1.631724 | 0.129933  | -0.088404 |
| C | -4.525068 | 0.792935 | -0.978746 | -0.332745 |

|   |           |           |           |           |
|---|-----------|-----------|-----------|-----------|
| C | -4.675111 | -0.566852 | -0.306435 | -0.176226 |
| C | -4.695782 | -0.294581 | 1.084201  | -0.076681 |
| C | -3.013023 | -1.479890 | -0.661794 | -0.150800 |
| C | -3.311640 | -2.136385 | -2.007605 | -0.464048 |
| C | -1.906349 | -0.568953 | -0.651489 | -0.186235 |
| C | -1.007566 | -0.367135 | 0.413234  | 0.414833  |
| C | -1.294843 | -1.089227 | 1.722993  | -0.371841 |
| C | -0.950932 | -2.595061 | 1.768996  | -0.466950 |
| N | 0.086923  | 0.427366  | 0.329984  | -0.517122 |
| C | 1.038549  | 0.634629  | 1.451133  | -0.065054 |
| C | 1.864575  | 1.830239  | 1.007431  | 0.621436  |
| N | 1.547609  | 2.113444  | -0.282450 | -0.457826 |
| C | 0.435017  | 1.335803  | -0.842555 | 0.359162  |
| C | 2.007923  | -0.527443 | 1.817607  | -0.383643 |
| C | 2.926555  | -1.011418 | 0.712469  | 0.153150  |
| C | 2.592419  | -2.120922 | -0.077263 | -0.200919 |
| C | 3.446556  | -2.567284 | -1.087804 | -0.129503 |
| C | 4.653848  | -1.908129 | -1.324135 | -0.127991 |
| C | 5.003226  | -0.807585 | -0.538994 | -0.132607 |
| C | 4.149573  | -0.365132 | 0.472187  | -0.188053 |
| C | 0.908947  | 0.533815  | -2.065653 | -0.470174 |
| C | -0.697987 | 2.324193  | -1.178398 | -0.460353 |
| C | 2.272977  | 3.135744  | -1.024820 | -0.344753 |
| O | 2.704460  | 2.381525  | 1.697539  | -0.510743 |
| H | 0.490574  | 0.921994  | 2.354154  | 0.192262  |
| H | 2.732525  | 2.718169  | -1.925578 | 0.182041  |
| H | 1.627998  | 3.975735  | -1.301592 | 0.175071  |
| H | 3.056826  | 3.500930  | -0.359784 | 0.223673  |
| H | -1.033144 | 2.834638  | -0.270639 | 0.165431  |
| H | -0.309426 | 3.077996  | -1.868062 | 0.183740  |
| H | -1.553917 | 1.860471  | -1.665549 | 0.158452  |
| H | 1.768789  | -0.085371 | -1.802980 | 0.207560  |
| H | 0.124745  | -0.113135 | -2.463639 | 0.163298  |
| H | 1.199372  | 1.223155  | -2.864056 | 0.173213  |
| H | 2.605210  | -0.117444 | 2.639650  | 0.203668  |
| H | 1.438733  | -1.360184 | 2.234360  | 0.162484  |
| H | 1.661942  | -2.653977 | 0.101308  | 0.121564  |
| H | 5.949017  | -0.299106 | -0.703882 | 0.152953  |
| H | 5.323810  | -2.258468 | -2.104076 | 0.151779  |
| H | 3.173990  | -3.435845 | -1.681156 | 0.144121  |
| H | 4.433845  | 0.485453  | 1.085065  | 0.168493  |
| H | -1.275434 | -3.006354 | 2.729953  | 0.183193  |
| H | -1.444086 | -3.161630 | 0.975452  | 0.167754  |
| H | 0.121008  | -2.775583 | 1.676954  | 0.190964  |
| H | -2.369900 | -0.978405 | 1.908938  | 0.169767  |
| H | -0.801123 | -0.589813 | 2.557362  | 0.182782  |
| H | -3.054071 | -2.195010 | 0.152375  | 0.178088  |
| H | -5.364408 | -1.302333 | -0.711971 | 0.189810  |
| H | -4.999265 | -1.003569 | 1.848521  | 0.192353  |
| H | -3.996706 | 1.423672  | 2.315681  | 0.184809  |
| H | -1.702205 | -0.091633 | -1.598217 | 0.143312  |
| H | -3.581778 | 2.631015  | -0.002372 | 0.190804  |
| H | -2.482027 | -2.802922 | -2.270345 | 0.191942  |
| H | -4.223487 | -2.738657 | -1.978662 | 0.177050  |
| H | -3.408218 | -1.398304 | -2.810876 | 0.169491  |
| H | -5.537659 | 1.158892  | -1.219831 | 0.225058  |
| H | -3.956254 | 0.821856  | -1.910279 | 0.185716  |

### TS13 (Z)-a1-exo

B3LYP/6-31G(d) energy= -1118.875875

Zero-point correction (ZPC)= 0.52694

HF/6-31G(d)// B3LYP/6-31G(d) energy= -1111.5148710000

CPCM:HF/6-31G(d)// B3LYP/6-31G(d) ( $\epsilon=78.39$ ) energy= -1111.5822800000

### Number of Imaginary Frequencies=1

|   |           |           |           |           |
|---|-----------|-----------|-----------|-----------|
| C | -4.555880 | 1.477582  | -0.893604 | -0.103356 |
| C | -4.142275 | 1.591590  | 0.413710  | -0.082436 |
| C | -4.441686 | 0.329556  | 1.148300  | -0.341751 |
| C | -4.705752 | -0.654743 | 0.016048  | -0.198041 |
| C | -4.986382 | 0.147835  | -1.115793 | -0.047648 |
| C | -1.923586 | -0.607261 | -0.373025 | -0.182260 |
| C | -3.019177 | -1.530489 | -0.334188 | -0.147524 |
| C | -3.289415 | -2.332058 | -1.601305 | -0.460707 |
| C | -0.949876 | -0.438160 | 0.628370  | 0.403758  |
| C | -1.083692 | -1.248017 | 1.917061  | -0.375876 |
| C | -0.723678 | -2.745669 | 1.807175  | -0.466500 |
| N | 0.127130  | 0.376240  | 0.492870  | -0.514038 |
| C | 1.172046  | 0.538015  | 1.535985  | -0.067863 |
| C | 1.926267  | 1.783118  | 1.102854  | 0.621397  |
| N | 1.499250  | 2.129505  | -0.138508 | -0.456514 |
| C | 0.367591  | 1.348743  | -0.655744 | 0.358707  |
| C | 2.196856  | -0.617738 | 1.738956  | -0.382588 |
| C | 3.036592  | -0.996195 | 0.534120  | 0.151922  |
| C | 4.205770  | -0.280985 | 0.228806  | -0.188496 |
| C | 4.985905  | -0.627456 | -0.874905 | -0.132913 |
| C | 4.617181  | -1.699852 | -1.689645 | -0.128103 |
| C | 3.464777  | -2.427707 | -1.389882 | -0.128971 |
| C | 2.683685  | -2.076790 | -0.286796 | -0.201805 |
| C | 0.770178  | 0.616617  | -1.946625 | -0.469250 |
| C | -0.808605 | 2.319388  | -0.864619 | -0.462000 |
| C | 2.129682  | 3.219787  | -0.870732 | -0.344362 |
| O | 2.802635  | 2.320773  | 1.757780  | -0.511486 |
| H | -3.692818 | 0.044007  | 1.888199  | 0.187868  |
| H | -5.387829 | 0.463361  | 1.699912  | 0.225345  |
| H | -5.298972 | -1.547850 | 0.199017  | 0.192145  |
| H | -3.737764 | 2.484332  | 0.877470  | 0.192451  |
| H | -5.406200 | -0.217994 | -2.046975 | 0.195065  |
| H | -4.553596 | 2.268343  | -1.635028 | 0.186180  |
| H | -3.072738 | -2.150282 | 0.557424  | 0.179421  |
| H | -2.519232 | -3.105476 | -1.706251 | 0.188324  |
| H | -4.260842 | -2.835580 | -1.573721 | 0.171574  |
| H | -3.246839 | -1.702723 | -2.495490 | 0.167510  |
| H | -1.774260 | -0.117109 | -1.324035 | 0.143971  |
| H | -0.496834 | -0.800859 | 2.718884  | 0.185556  |
| H | -2.124595 | -1.176458 | 2.247935  | 0.173191  |
| H | -1.345876 | -3.267798 | 1.076078  | 0.165377  |
| H | -0.873502 | -3.223370 | 2.780475  | 0.185018  |
| H | 0.317169  | -2.899783 | 1.518294  | 0.190223  |
| H | 1.442330  | 4.056530  | -1.030945 | 0.175020  |
| H | 2.515053  | 2.876148  | -1.835255 | 0.181111  |
| H | 2.961559  | 3.564108  | -0.254699 | 0.223111  |
| H | -0.027995 | -0.028536 | -2.319055 | 0.162258  |
| H | 0.989060  | 1.349491  | -2.729056 | 0.171970  |
| H | -1.083110 | 2.790424  | 0.084418  | 0.162945  |
| H | -1.690333 | 1.851058  | -1.295656 | 0.163216  |
| H | -0.491077 | 3.105773  | -1.554288 | 0.180459  |
| H | 0.701806  | 0.751564  | 2.500741  | 0.194021  |
| H | 1.682102  | -1.495141 | 2.134942  | 0.163213  |
| H | 2.847985  | -0.250471 | 2.540175  | 0.203466  |
| H | 1.658587  | 0.005715  | -1.776810 | 0.207803  |
| H | 4.506620  | 0.547690  | 0.863436  | 0.169199  |
| H | 5.891118  | -0.066420 | -1.089661 | 0.152656  |
| H | 5.230985  | -1.975315 | -2.542455 | 0.151533  |
| H | 3.178813  | -3.275399 | -2.006618 | 0.144188  |
| H | 1.796314  | -2.663041 | -0.061310 | 0.123420  |

### TS13 (Z)-a2-endo

B3LYP/6-31G(d) energy= -1118.883369



Zero-point correction (ZPC)= 0.526477  
HF/6-31G(d)// B3LYP/6-31G(d) energy= -1111.5167980000  
CPCM:HF/6-31G(d)// B3LYP/6-31G(d) ( $\epsilon=78.39$ ) energy= -  
1111.5852280000

Number of Imaginary Frequencies=1

|   |           |           |           |           |
|---|-----------|-----------|-----------|-----------|
| C | 3.309185  | 1.743594  | -1.360780 | -0.330167 |
| C | 2.199985  | 2.237043  | -0.489725 | -0.097770 |
| C | 2.630920  | 2.277102  | 0.818211  | -0.103033 |
| C | 3.894628  | 1.645323  | 0.898802  | -0.074815 |
| C | 4.228000  | 1.076646  | -0.348033 | -0.176700 |
| C | 2.072299  | -0.710164 | -0.471936 | -0.187458 |
| C | 3.482777  | -0.772387 | -0.269198 | -0.145975 |
| C | 4.306719  | -1.441133 | -1.362223 | -0.465303 |
| C | 1.087941  | -0.824457 | 0.529317  | 0.414772  |
| C | 1.522801  | -0.843101 | 1.984147  | -0.373530 |
| C | 1.792763  | -2.278244 | 2.489174  | -0.459141 |
| N | -0.221179 | -1.024491 | 0.262863  | -0.513136 |
| C | -1.267470 | -1.024722 | 1.313930  | -0.063102 |
| C | -2.457857 | -1.680937 | 0.632269  | 0.621828  |
| N | -2.149476 | -1.872588 | -0.677092 | -0.457876 |
| C | -0.791198 | -1.474443 | -1.072058 | 0.355724  |
| C | -1.696965 | 0.349137  | 1.906775  | -0.381019 |
| C | -2.172718 | 1.401183  | 0.925568  | 0.157160  |
| C | -3.446521 | 1.330696  | 0.339760  | -0.194334 |
| C | -3.872231 | 2.314329  | -0.554665 | -0.133058 |
| C | -3.041005 | 3.391749  | -0.868922 | -0.127776 |
| C | -1.782115 | 3.486681  | -0.273137 | -0.137270 |
| C | -1.356256 | 2.497091  | 0.615521  | -0.195837 |
| C | -0.856114 | -0.328918 | -2.097073 | -0.467936 |
| C | -0.060152 | -2.719047 | -1.610603 | -0.460231 |
| C | -3.127571 | -2.422043 | -1.606848 | -0.345609 |
| O | -3.513459 | -1.937895 | 1.185364  | -0.511523 |
| H | 1.250795  | 2.609109  | -0.858294 | 0.192450  |
| H | 2.087242  | 2.698282  | 1.656167  | 0.180571  |
| H | 4.487634  | 1.549634  | 1.803101  | 0.188415  |
| H | 5.260657  | 0.847661  | -0.592317 | 0.186492  |
| H | 3.843182  | 2.621446  | -1.763048 | 0.224446  |
| H | 3.003649  | 1.145784  | -2.221043 | 0.181457  |
| H | 1.751258  | -0.684369 | -1.503062 | 0.145024  |
| H | 4.062108  | -1.054485 | -2.357070 | 0.170010  |
| H | 5.381031  | -1.324239 | -1.198092 | 0.179728  |
| H | 4.090217  | -2.516444 | -1.363079 | 0.191241  |
| H | 3.818355  | -1.047835 | 0.726303  | 0.178766  |
| H | 2.589042  | -2.762476 | 1.915928  | 0.168533  |
| H | 0.901747  | -2.909637 | 2.415018  | 0.176250  |
| H | 2.096959  | -2.248750 | 3.539710  | 0.188149  |
| H | 2.429177  | -0.243288 | 2.092440  | 0.168122  |
| H | 0.777158  | -0.368975 | 2.621713  | 0.186349  |
| H | -0.596595 | -3.094366 | -2.486120 | 0.182367  |
| H | -0.047931 | -3.506872 | -0.851781 | 0.175324  |
| H | 0.963222  | -2.516297 | -1.924433 | 0.166071  |
| H | 0.136179  | 0.013325  | -2.397874 | 0.157206  |
| H | -1.362361 | -0.677991 | -3.002072 | 0.176626  |
| H | -1.412543 | 0.517790  | -1.689672 | 0.201215  |
| H | -2.795718 | -3.377187 | -2.025106 | 0.180134  |
| H | -3.336741 | -1.721824 | -2.421319 | 0.178819  |
| H | -4.041247 | -2.586701 | -1.033913 | 0.223784  |
| H | -0.962702 | -1.669503 | 2.143390  | 0.196563  |
| H | -1.143506 | 4.340960  | -0.483167 | 0.140779  |
| H | -0.387328 | 2.589376  | 1.101439  | 0.115037  |
| H | -0.880647 | 0.760195  | 2.508662  | 0.158914  |
| H | -2.502950 | 0.092810  | 2.604383  | 0.209455  |
| H | -3.380532 | 4.162312  | -1.554933 | 0.154543  |
| H | -4.864236 | 2.247816  | -0.992531 | 0.156276  |

H -4.111392 0.511575 0.597720 0.173859

### TS13 (Z)-a2-exo

B3LYP/6-31G(d) energy= -1118.882117

Zero-point correction (ZPC)= 0.526916

HF/6-31G(d)// B3LYP/6-31G(d) energy= -1111.5224980000

CPCM:HF/6-31G(d)// B3LYP/6-31G(d) ( $\epsilon=78.39$ ) energy= -  
1111.5836240000

Number of Imaginary Frequencies=1

|   |           |           |           |           |
|---|-----------|-----------|-----------|-----------|
| C | 2.929437  | 2.138194  | -1.466851 | -0.106869 |
| C | 2.174826  | 2.270694  | -0.324481 | -0.093693 |
| C | 2.998193  | 1.884950  | 0.861305  | -0.341084 |
| C | 4.139137  | 1.111558  | 0.220652  | -0.197994 |
| C | 4.156604  | 1.514527  | -1.129523 | -0.050951 |
| C | 2.065264  | -0.739509 | -0.224616 | -0.179255 |
| C | 3.444087  | -0.770511 | 0.134630  | -0.142939 |
| C | 4.416524  | -1.467276 | -0.802034 | -0.462394 |
| C | 0.982685  | -0.933003 | 0.654401  | 0.402879  |
| C | 1.252660  | -1.130714 | 2.138990  | -0.374299 |
| C | 1.463004  | -2.620947 | 2.488000  | -0.457328 |
| N | -0.295176 | -1.086331 | 0.237723  | -0.512924 |
| C | -1.444909 | -1.189221 | 1.170453  | -0.060116 |
| C | -2.574732 | -1.699179 | 0.288549  | 0.621854  |
| N | -2.130713 | -1.748203 | -0.994032 | -0.458461 |
| C | -0.728113 | -1.360241 | -1.192834 | 0.355157  |
| C | -1.906253 | 0.101158  | 1.911167  | -0.387145 |
| C | -2.195731 | 1.319854  | 1.060159  | 0.162954  |
| C | -3.363211 | 1.409279  | 0.285699  | -0.196100 |
| C | -3.624193 | 2.548023  | -0.478775 | -0.132446 |
| C | -2.733526 | 3.623581  | -0.470804 | -0.128256 |
| C | -1.582742 | 3.558107  | 0.316832  | -0.136178 |
| C | -1.318864 | 2.413418  | 1.072866  | -0.197185 |
| C | -0.652430 | -0.099900 | -2.071814 | -0.470729 |
| C | 0.023087  | -2.563679 | -1.794726 | -0.459616 |
| C | -3.015754 | -2.147152 | -2.080605 | -0.345598 |
| O | -3.693607 | -1.969513 | 0.690446  | -0.512244 |
| H | 1.170892  | 2.675709  | -0.266540 | 0.193112  |
| H | 3.662214  | -0.975797 | 1.180519  | 0.180580  |
| H | 4.315457  | -2.552560 | -0.676257 | 0.187513  |
| H | 5.457116  | -1.208483 | -0.583354 | 0.174715  |
| H | 5.063147  | 0.918887  | 0.759372  | 0.187772  |
| H | 4.958636  | 1.307583  | -1.830120 | 0.191066  |
| H | 2.633940  | 2.440412  | -2.465106 | 0.181685  |
| H | 2.451806  | 1.388485  | 1.663869  | 0.182259  |
| H | 1.862486  | -0.672128 | -1.282556 | 0.147769  |
| H | 4.210821  | -1.235081 | -1.851172 | 0.167905  |
| H | 3.429570  | 2.802752  | 1.296315  | 0.222225  |
| H | -2.814183 | -0.215076 | 2.438291  | 0.212070  |
| H | -1.176451 | 0.367467  | 2.681099  | 0.163179  |
| H | -0.438755 | 2.382951  | 1.713109  | 0.118550  |
| H | -0.905622 | 4.407486  | 0.362162  | 0.142235  |
| H | -2.947126 | 4.514764  | -1.053751 | 0.154660  |
| H | -4.079764 | 0.593001  | 0.298505  | 0.172849  |
| H | -4.536874 | 2.602575  | -1.065510 | 0.156611  |
| H | -1.246248 | -1.955253 | 1.926422  | 0.197399  |
| H | -3.080084 | -1.367347 | -2.845379 | 0.177701  |
| H | -2.690740 | -3.083711 | -2.544260 | 0.181053  |
| H | -4.001632 | -2.297263 | -1.638234 | 0.223558  |
| H | -0.439838 | -2.827752 | -2.749269 | 0.181985  |
| H | 1.075398  | -2.364560 | -1.993925 | 0.166831  |
| H | -0.052654 | -3.426719 | -1.126875 | 0.175318  |
| H | 0.368277  | 0.272172  | -2.173707 | 0.160846  |
| H | -1.273135 | 0.693306  | -1.648931 | 0.197359  |
| H | -1.017404 | -0.331856 | -3.076821 | 0.174443  |

H 2.317347 -3.038387 1.946873 0.167780  
H 2.143628 -0.571338 2.429868 0.168684  
H 0.442365 -0.726963 2.743567 0.186572  
H 0.585084 -3.226554 2.241942 0.175705  
H 1.652104 -2.724938 3.560629 0.189063

**TS13 (Z)-b2-endo**

B3LYP/6-31G(d) energy= -1118.881591

Zero-point correction (ZPC)= 0.526317

HF/6-31G(d)// B3LYP/6-31G(d) energy= -1111.5216980000

CPCM:HF/6-31G(d)// B3LYP/6-31G(d) ( $\epsilon=78.39$ ) energy= -  
1111.5817330000

Number of Imaginary Frequencies=1

C 0.012273 3.575211 0.763719 -0.196019  
C -0.123113 2.793353 -0.395108 0.165720  
C 0.899552 2.836025 -1.350224 -0.197284  
C 2.034978 3.627965 -1.152629 -0.140535  
C 2.168044 4.380887 0.014862 -0.130955  
C 1.150795 4.353153 0.972815 -0.124841  
C -1.387817 1.999266 -0.645977 -0.368393  
C -1.769842 0.876564 0.364610 -0.074330  
N -1.152740 -0.455868 0.146942 -0.512289  
C -2.150377 -1.403534 -0.495270 0.351688  
N -3.399184 -0.646255 -0.333116 -0.458146  
C -3.258813 0.601578 0.191846 0.606319  
C 0.069490 -0.803606 0.612815 0.414207  
C 0.697251 0.079402 1.672649 -0.381603  
C 0.137157 -0.216339 3.081351 -0.460560  
C -1.851752 -1.621035 -1.990022 -0.455518  
C -2.288020 -2.726772 0.279613 -0.463951  
C -4.713028 -1.170201 -0.683887 -0.345146  
O -4.144356 1.401942 0.430088 -0.496204  
C 0.719016 -1.993386 0.232617 -0.189128  
C 1.833720 -2.586814 0.894873 -0.143475  
C 1.892430 -4.108284 0.917407 -0.466328  
C 3.499640 -2.191055 -0.147213 -0.176714  
C 3.802386 -0.856332 0.187248 -0.078434  
C 3.170376 0.027365 -0.721144 -0.093860  
C 2.574061 -0.718313 -1.712327 -0.104544  
C 2.981881 -2.149852 -1.576830 -0.327376  
H -1.600855 1.216824 1.387517 0.196105  
H -1.368820 1.569621 -1.653578 0.157472  
H -2.241825 2.687515 -0.616486 0.218573  
H 0.792048 2.270386 -2.273698 0.128058  
H 2.805172 3.669058 -1.918533 0.149890  
H 3.045972 5.001490 0.168639 0.156605  
H -0.789869 3.593409 1.499171 0.149305  
H 1.234258 4.955534 1.872918 0.157621  
H -1.422064 -3.379634 0.183457 0.166972  
H -3.147753 -3.274609 -0.115040 0.184047  
H -2.465918 -2.526812 1.340190 0.177346  
H -0.898507 -2.130543 -2.149783 0.162613  
H -2.632111 -2.241847 -2.440284 0.181318  
H -1.829183 -0.664051 -2.518185 0.175959  
H -5.032732 -1.961352 0.001953 0.182315  
H -4.723745 -1.553892 -1.708512 0.174773  
H -5.412042 -0.336077 -0.606300 0.225106  
H 0.621019 0.437029 3.813617 0.185715  
H 1.776649 -0.081390 1.673975 0.164612  
H 0.559483 1.132663 1.427279 0.205316  
H 0.320744 -1.254024 3.377688 0.165199  
H -0.942286 -0.042773 3.139279 0.173270  
H 2.120873 -2.146616 1.845309 0.180481  
H 4.125666 -3.006700 0.200670 0.185396

H 4.374865 -0.549869 1.057351 0.187531  
H 2.221926 -2.885044 -1.848092 0.178997  
H 3.841568 -2.328012 -2.244985 0.223059  
H 0.284037 -2.579120 -0.565068 0.142795  
H 3.129934 1.106005 -0.628189 0.189883  
H 1.996004 -0.325075 -2.541003 0.181109  
H 1.750578 -4.540253 -0.078831 0.169508  
H 1.087089 -4.485606 1.559662 0.190726  
H 2.836410 -4.478389 1.325647 0.179871

**TS13 (Z)-b2-exo**

B3LYP/6-31G(d) energy= -1118.880178

Zero-point correction (ZPC)= 0.52615

HF/6-31G(d)// B3LYP/6-31G(d) energy= -1111.5212650000

CPCM:HF/6-31G(d)// B3LYP/6-31G(d) ( $\epsilon=78.39$ ) energy= -  
1111.5815470000

Number of Imaginary Frequencies=1

C 0.108589 2.750467 -1.312006 -0.197959  
C -0.988600 2.628224 -0.450299 0.166452  
C -1.129898 3.563223 0.587625 -0.196172  
C -0.184743 4.572313 0.773730 -0.123796  
C 0.912687 4.674137 -0.085401 -0.130203  
C 1.053067 3.765095 -1.134816 -0.137118  
C -2.026744 1.550236 -0.664811 -0.369101  
C -2.076046 0.366935 0.349283 -0.078180  
N -1.021090 -0.667138 0.214915 -0.509335  
C -1.573729 -1.900018 -0.477440 0.352616  
N -3.015293 -1.617673 -0.444846 -0.458796  
C -3.359370 -0.402883 0.064660 0.611205  
C 0.211757 -0.560370 0.767668 0.403794  
C 0.395910 0.491050 1.848809 -0.381458  
C -0.128400 0.000426 3.216267 -0.458761  
C -1.082482 -2.000112 -1.933196 -0.458144  
C -1.322038 -3.189889 0.325474 -0.463121  
C -4.032189 -2.555704 -0.902324 -0.344737  
O -4.483126 0.041508 0.209738 -0.496769  
C 1.255913 -1.456547 0.476761 -0.180118  
C 2.477579 -1.574539 1.201534 -0.142975  
C 3.010572 -2.968160 1.489620 -0.462073  
C 3.959560 -0.718827 0.156687 -0.199249  
C 3.335967 0.549635 -0.400773 -0.341984  
C 2.774778 0.079498 -1.701360 -0.090431  
C 3.332449 -1.131671 -2.035500 -0.104594  
C 4.121602 -1.580223 -0.946043 -0.051248  
H 2.106603 0.666841 -2.319313 0.182942  
H 1.092954 -2.205158 -0.284830 0.144513  
H 3.189462 -1.666623 -2.967449 0.180895  
H 4.159696 1.252326 -0.614647 0.220473  
H 4.705402 -2.494563 -0.941226 0.190730  
H 2.631588 1.087460 0.233969 0.198367  
H 4.701051 -0.680733 0.950249 0.188309  
H 2.592299 -0.906518 2.052741 0.183209  
H 4.059120 -2.953571 1.802626 0.174650  
H 2.911703 -3.631699 0.625424 0.167140  
H 2.429982 -3.405599 2.311533 0.187699  
H 0.025397 0.778484 3.970076 0.186549  
H 0.397666 -0.901684 3.544083 0.163804  
H -1.198022 -0.231169 3.186773 0.173167  
H 1.454319 0.737428 1.944205 0.163708  
H -0.092533 1.423778 1.570751 0.206849  
H -1.912416 -3.996683 -0.116867 0.183351  
H -0.283013 -3.514796 0.317390 0.166522  
H -1.644972 -3.058614 1.362231 0.177563  
H 0.003130 -2.106293 -1.992700 0.164332

|   |           |           |           |          |
|---|-----------|-----------|-----------|----------|
| H | -1.527293 | -2.873134 | -2.420242 | 0.179634 |
| H | -1.374207 | -1.108518 | -2.494923 | 0.174366 |
| H | -4.123900 | -3.417166 | -0.232959 | 0.181971 |
| H | -3.816505 | -2.906679 | -1.916032 | 0.174239 |
| H | -4.978661 | -2.012882 | -0.904640 | 0.224753 |
| H | -2.118943 | 0.748550  | 1.370635  | 0.195974 |
| H | 0.199899  | 2.066913  | -2.153727 | 0.125522 |
| H | 1.884154  | 3.860014  | -1.828931 | 0.142500 |
| H | 1.639530  | 5.469732  | 0.049936  | 0.155721 |
| H | -0.315487 | 5.291841  | 1.576952  | 0.158581 |
| H | -1.996405 | 3.512293  | 1.244176  | 0.149905 |
| H | -3.028877 | 1.991448  | -0.605028 | 0.214046 |
| H | -1.930176 | 1.132816  | -1.673510 | 0.160311 |

**TS13 (Z)-c2-endo**

B3LYP/6-31G(d) energy= -1118.882772

Zero-point correction (ZPC)= 0.526119

HF/6-31G(d)// B3LYP/6-31G(d) energy= -1111.5239650000

CPCM:HF/6-31G(d)// B3LYP/6-31G(d) ( $\epsilon=78.39$ ) energy= -1111.5855110000

Number of Imaginary Frequencies=1

|   |           |           |           |           |
|---|-----------|-----------|-----------|-----------|
| C | -2.841375 | -3.008324 | -0.368268 | -0.074653 |
| C | -3.917651 | -2.097558 | -0.272428 | -0.177333 |
| C | -3.892328 | -1.301993 | -1.570635 | -0.328691 |
| C | -2.484054 | -1.503866 | -2.027299 | -0.097650 |
| C | -1.943403 | -2.592677 | -1.378889 | -0.098306 |
| C | -2.417996 | 0.126601  | 0.475186  | -0.188674 |
| C | -3.361508 | -0.767419 | 1.068154  | -0.148357 |
| C | -1.020049 | 0.070289  | 0.625419  | 0.408175  |
| C | -0.399070 | -1.101048 | 1.364944  | -0.377533 |
| C | -0.227402 | -0.802112 | 2.871166  | -0.456819 |
| C | -4.709356 | -0.173946 | 0.460572  | -0.465133 |
| N | -0.186718 | 1.054585  | 1.224030  | -0.513137 |
| C | 1.283969  | 0.878365  | 0.194470  | -0.069327 |
| C | 1.800404  | 2.292803  | -0.016587 | 0.606710  |
| N | 0.732978  | 3.105126  | -0.252444 | -0.460820 |
| C | -0.578613 | 2.445888  | -0.218178 | 0.354019  |
| C | 1.791127  | -0.079644 | -0.935157 | -0.370250 |
| C | 2.902594  | -1.015036 | -0.496228 | 0.151576  |
| C | 2.764616  | -2.399618 | -0.659699 | -0.196802 |
| C | 3.783660  | -3.271958 | -0.271564 | -0.127005 |
| C | 4.955492  | -2.766049 | 0.290642  | -0.125591 |
| C | 5.103192  | -1.386825 | 0.456934  | -0.130170 |
| C | 4.087482  | -0.514719 | 0.065297  | -0.195550 |
| C | -1.463601 | 3.150749  | 0.824525  | -0.462791 |
| C | -1.194237 | 2.446105  | -1.630306 | -0.454654 |
| C | 0.912711  | 4.524146  | -0.530967 | -0.345542 |
| O | 2.974862  | 2.618793  | -0.010788 | -0.494171 |
| H | -2.843498 | 0.963366  | -0.060335 | 0.143169  |
| H | -2.975141 | -1.441353 | 1.827568  | 0.181589  |
| H | -4.859164 | -2.412690 | 0.167558  | 0.188702  |
| H | -4.559154 | -1.813640 | -2.285548 | 0.225380  |
| H | -0.982140 | -3.046928 | -1.590366 | 0.185255  |
| H | -2.020150 | -0.951521 | -2.837067 | 0.188661  |
| H | -5.160811 | 0.398417  | 0.643393  | 0.169282  |
| H | -5.419309 | -0.940776 | 1.781187  | 0.179511  |
| H | -4.563525 | 0.512084  | 2.303594  | 0.192141  |
| H | -4.228528 | -0.264994 | -1.520609 | 0.181888  |
| H | -2.692036 | -3.862525 | 0.284863  | 0.190920  |
| H | -1.352327 | 3.475236  | -1.965513 | 0.183249  |
| H | -2.162492 | 1.942704  | -1.664377 | 0.160586  |
| H | -0.517724 | 1.956040  | -2.336647 | 0.173408  |
| H | 0.493534  | 5.147499  | 0.265040  | 0.182152  |
| H | 0.457871  | 4.802971  | -1.486395 | 0.175576  |

|   |           |           |           |          |
|---|-----------|-----------|-----------|----------|
| H | 1.988657  | 4.696341  | -0.584805 | 0.226191 |
| H | -2.443612 | 2.687357  | 0.935687  | 0.167317 |
| H | -0.964380 | 3.154534  | 1.797640  | 0.179938 |
| H | -1.627112 | 4.187055  | 0.516226  | 0.183160 |
| H | 1.642426  | 0.527160  | 1.164949  | 0.208058 |
| H | 0.940571  | -0.666484 | -1.299090 | 0.144677 |
| H | 2.128808  | 0.531815  | -1.781027 | 0.193504 |
| H | 4.211627  | 0.558352  | 0.185387  | 0.182121 |
| H | 6.016668  | -0.986152 | 0.887293  | 0.153499 |
| H | 5.750981  | -3.440929 | 0.593099  | 0.151418 |
| H | 3.662284  | -4.342518 | -0.411732 | 0.143238 |
| H | 1.858433  | -2.801283 | -1.110970 | 0.109357 |
| H | 0.215264  | -1.669141 | 3.370087  | 0.189322 |
| H | -1.187433 | -0.582995 | 3.348724  | 0.165476 |
| H | -1.036832 | -1.979278 | 1.243064  | 0.163108 |
| H | 0.566459  | -1.374117 | 0.936423  | 0.201290 |
| H | 0.431455  | 0.055145  | 3.041273  | 0.175193 |

**TS13 (Z)-c2-exo**

B3LYP/6-31G(d) energy= -1118.881124

Zero-point correction (ZPC)= 0.526369

HF/6-31G(d)// B3LYP/6-31G(d) energy= -1111.5222230000

CPCM:HF/6-31G(d)// B3LYP/6-31G(d) ( $\epsilon=78.39$ ) energy= -1111.5836610000

Number of Imaginary Frequencies=1

|   |           |           |           |           |
|---|-----------|-----------|-----------|-----------|
| C | -2.604461 | -2.577888 | -0.965696 | -0.338451 |
| C | -2.588661 | -1.518611 | -2.017565 | -0.093358 |
| C | -3.832451 | -0.935046 | -2.099631 | -0.102673 |
| C | -4.632883 | -1.425484 | -1.039076 | -0.050167 |
| C | -3.855257 | -2.226144 | -0.175829 | -0.197713 |
| C | -3.202274 | -0.959875 | 1.210620  | -0.146282 |
| C | -4.481544 | -0.418452 | 1.828032  | -0.461589 |
| C | -2.301784 | -0.029192 | 0.612165  | -0.179140 |
| C | -0.898987 | -0.050914 | 0.707769  | 0.393377  |
| C | -0.199449 | -1.190478 | 1.433530  | -0.378515 |
| C | 0.060606  | -0.846639 | 2.917271  | -0.455728 |
| N | -0.111171 | 0.962100  | 0.280703  | -0.509634 |
| C | 1.361472  | 0.828153  | 0.186068  | -0.068310 |
| C | 1.829063  | 2.256324  | -0.042892 | 0.606051  |
| N | 0.730527  | 3.040604  | -0.222761 | -0.460249 |
| C | -0.559563 | 2.344969  | -0.135533 | 0.353484  |
| C | 1.846644  | -0.112808 | -0.968306 | -0.367857 |
| C | 2.993901  | -1.025282 | -0.576512 | 0.150456  |
| C | 4.192897  | -0.498696 | -0.071737 | -0.195282 |
| C | 5.241295  | -1.348910 | 0.279625  | -0.130374 |
| C | 5.111914  | -2.731834 | 0.129046  | -0.125608 |
| C | 3.925888  | -3.263403 | -0.376835 | -0.126909 |
| C | 2.873956  | -2.413288 | -0.725086 | -0.194168 |
| C | -1.235929 | 2.335287  | -1.519179 | -0.456631 |
| C | -1.415662 | 3.021686  | 0.949531  | -0.462436 |
| C | 0.860045  | 4.462934  | -0.511915 | -0.345742 |
| O | 2.993636  | 2.612885  | -0.092191 | -0.494569 |
| H | -2.767903 | 0.818204  | 0.130573  | 0.144953  |
| H | -1.752847 | -1.331376 | -2.682586 | 0.188524  |
| H | -4.150287 | -0.212011 | -2.842176 | 0.183258  |
| H | -5.671645 | -1.159695 | -0.874191 | 0.192481  |
| H | -5.214959 | -1.207826 | 2.019421  | 0.174943  |
| H | -4.241488 | 0.046210  | 2.792362  | 0.189021  |
| H | -4.946408 | 0.346342  | 1.198793  | 0.167230  |
| H | -4.324291 | -2.953272 | 0.481889  | 0.190425  |
| H | -2.747693 | -1.738147 | 1.820819  | 0.183477  |
| H | -2.789535 | -3.548465 | -1.457044 | 0.225031  |
| H | -1.677592 | -2.688613 | -0.402605 | 0.186360  |
| H | -1.609283 | 4.057783  | 0.658640  | 0.182595  |

|   |           |           |           |          |
|---|-----------|-----------|-----------|----------|
| H | -2.382726 | 2.540963  | 1.094611  | 0.167040 |
| H | -0.878530 | 3.025497  | 1.902226  | 0.179749 |
| H | -1.461414 | 3.360241  | -1.827821 | 0.181200 |
| H | -0.565448 | 1.893254  | -2.262161 | 0.172460 |
| H | -2.174691 | 1.778341  | -1.521990 | 0.163541 |
| H | 0.370450  | 4.724725  | -1.455197 | 0.175541 |
| H | 0.446058  | 5.077401  | 0.293542  | 0.181676 |
| H | 1.928563  | 4.665844  | -0.597596 | 0.226186 |
| H | 1.774285  | 0.485718  | 1.137520  | 0.208288 |
| H | 2.139054  | 0.510824  | -1.821985 | 0.193740 |
| H | 1.956268  | -2.834855 | -1.132214 | 0.110058 |
| H | 3.818387  | -4.337006 | -0.504287 | 0.143811 |
| H | 5.932597  | -3.389691 | 0.400128  | 0.151131 |
| H | 6.165397  | -0.928409 | 0.666191  | 0.153132 |
| H | 4.301519  | 0.577340  | 0.036598  | 0.181285 |
| H | 0.996256  | -0.716442 | -1.304251 | 0.143096 |
| H | 0.694802  | 0.038271  | 3.028117  | 0.175154 |
| H | -0.876425 | -0.654528 | 3.449146  | 0.164680 |
| H | 0.567083  | -1.684922 | 3.404478  | 0.190760 |
| H | 0.741534  | -1.452965 | 0.946970  | 0.203181 |
| H | -0.816330 | -2.089213 | 1.388816  | 0.163974 |

**TS14 (E)-b1a-endo**

B3LYP/6-31G(d) energy= -1308.4124887000  
 Zero-point correction (ZPC)= 0.548544  
 HF/6-31G(d)// B3LYP/6-31G(d) energy= -1299.977972  
 CPCM:HF/6-31G(d)// B3LYP/6-31G(d) ( $\epsilon=78.39$ ) energy= -1300.038286  
 Number of Imaginary Frequencies=1

|   |           |           |           |           |
|---|-----------|-----------|-----------|-----------|
| C | 0.074059  | 2.924251  | -0.310522 | -0.184886 |
| C | 0.294649  | 2.477334  | 0.999449  | 0.161010  |
| C | 1.406577  | 2.970092  | 1.698955  | -0.196592 |
| C | 2.280904  | 3.879531  | 1.101504  | -0.130486 |
| C | 2.051843  | 4.315496  | -0.206018 | -0.132977 |
| C | 0.944995  | 3.836371  | -0.910461 | -0.135866 |
| C | -0.665200 | 1.515531  | 1.662643  | -0.375016 |
| C | -0.293695 | 0.006934  | 1.625389  | -0.074555 |
| C | -1.296532 | -0.746538 | 2.502250  | 0.609316  |
| N | -2.053113 | -1.531101 | 1.682056  | -0.437018 |
| C | -1.684337 | -1.471232 | 0.275488  | 0.039324  |
| N | -0.420959 | -0.668000 | 0.318529  | -0.470990 |
| C | -2.749761 | -0.920322 | -0.615046 | 0.385859  |
| C | -3.516074 | -1.493425 | -1.586989 | -0.203716 |
| C | -4.428789 | -0.483561 | -2.030091 | -0.215665 |
| C | -4.163850 | 0.638157  | -1.298475 | 0.362804  |
| O | -3.134727 | 0.381221  | -0.425133 | -0.484781 |
| C | -4.745678 | 2.006757  | -1.264837 | -0.535218 |
| C | -3.173349 | -2.330870 | 2.147955  | -0.337228 |
| O | -1.407678 | -0.620528 | 3.706331  | -0.492984 |
| C | 0.582797  | -0.803116 | -0.575879 | 0.405480  |
| C | 0.326178  | -1.559636 | -1.861916 | -0.356848 |
| C | -0.097150 | -0.629480 | -3.019915 | -0.454858 |
| C | 1.831086  | -0.188427 | -0.372493 | -0.179737 |
| C | 2.948937  | -2.505339 | 1.079406  | -0.100519 |
| C | 4.074452  | -1.558835 | 0.813668  | -0.325927 |
| C | 4.180203  | -1.620645 | -0.704183 | -0.177095 |
| C | 2.931523  | -0.221463 | -1.282243 | -0.154293 |
| C | 3.578257  | -2.846327 | -1.073299 | -0.075003 |
| C | 2.771948  | -3.324717 | -0.016120 | -0.099083 |
| C | 3.842442  | 0.999026  | -1.298166 | -0.462780 |
| H | 3.973076  | -0.568576 | 1.260091  | 0.186067  |
| H | 2.722031  | -0.590195 | -2.282379 | 0.175084  |
| H | 5.078784  | -1.281615 | -1.211365 | 0.186224  |
| H | 3.665768  | -3.310755 | -2.050601 | 0.185619  |

|   |           |           |           |          |
|---|-----------|-----------|-----------|----------|
| H | 2.454670  | -2.611747 | 2.039003  | 0.190280 |
| H | 4.996469  | -2.001293 | 1.228084  | 0.221785 |
| H | 2.111684  | -4.183100 | -0.067262 | 0.175030 |
| H | 4.176062  | 1.274418  | -0.292875 | 0.170985 |
| H | 3.281186  | 1.852161  | -1.695049 | 0.196774 |
| H | 4.720496  | 0.846054  | -1.931446 | 0.169481 |
| H | 1.949264  | 0.456035  | 0.488940  | 0.169443 |
| H | 1.243112  | -2.090719 | -2.135572 | 0.168285 |
| H | -0.436929 | -2.327958 | -1.729322 | 0.168296 |
| H | -0.231673 | -1.217802 | -3.932772 | 0.178026 |
| H | -1.043451 | -0.130735 | -2.796214 | 0.185371 |
| H | 0.656929  | 0.138872  | -3.212938 | 0.167938 |
| H | -5.152132 | 2.242409  | -0.274318 | 0.191734 |
| H | -3.995739 | 2.769927  | -1.505178 | 0.181904 |
| H | -5.555649 | 2.082443  | -1.994358 | 0.189172 |
| H | -5.189048 | -0.581390 | -2.792159 | 0.168179 |
| H | -3.449772 | -2.513160 | -1.942955 | 0.161014 |
| H | -1.464269 | -2.486318 | -0.076182 | 0.175148 |
| H | -3.231918 | -2.200321 | 3.229540  | 0.221030 |
| H | -3.017549 | -3.391321 | 1.917165  | 0.169482 |
| H | -4.109694 | -1.999242 | 1.687735  | 0.187950 |
| H | 0.711968  | -0.152603 | 2.025355  | 0.177411 |
| H | -0.750425 | 1.751024  | 2.729709  | 0.201696 |
| H | -1.664654 | 1.619947  | 1.229994  | 0.184553 |
| H | -0.797811 | 2.568480  | -0.854727 | 0.134405 |
| H | 0.748615  | 4.187603  | -1.919985 | 0.146741 |
| H | 2.720456  | 5.038230  | -0.665146 | 0.151898 |
| H | 3.126387  | 4.265752  | 1.664204  | 0.151475 |
| H | 1.572891  | 2.660353  | 2.728956  | 0.141814 |

**TS14 (E)-b1a-exo**

B3LYP/6-31G(d) energy= -1308.4111642000  
 Zero-point correction (ZPC)= 0.548431  
 HF/6-31G(d)// B3LYP/6-31G(d) energy= -1299.976625  
 CPCM:HF/6-31G(d)// B3LYP/6-31G(d) ( $\epsilon=78.39$ ) energy= -1300.034786  
 Number of Imaginary Frequencies=1

|   |           |           |           |           |
|---|-----------|-----------|-----------|-----------|
| C | 4.638830  | -1.279068 | 0.120171  | -0.049513 |
| C | 4.085191  | -1.671176 | -1.118056 | -0.196015 |
| C | 3.178817  | -2.850258 | -0.801391 | -0.333392 |
| C | 2.923043  | -2.661669 | 0.659244  | -0.098751 |
| C | 3.875221  | -1.815493 | 1.183612  | -0.099253 |
| C | 2.809272  | -0.223877 | -1.577793 | -0.152705 |
| C | 3.677939  | 1.020420  | -1.643247 | -0.458053 |
| C | 1.741257  | -0.251414 | -0.634934 | -0.169220 |
| C | 0.464413  | -0.801299 | -0.847171 | 0.386300  |
| C | 0.075736  | -1.327826 | -2.216062 | -0.355884 |
| C | -0.402033 | -0.199793 | -3.156765 | -0.453218 |
| N | -0.475288 | -0.768323 | 0.124952  | -0.464879 |
| C | -0.226835 | -0.321671 | 1.510472  | -0.077740 |
| C | -1.193283 | -1.182251 | 2.327909  | 0.608497  |
| N | -2.045234 | -1.788976 | 1.452748  | -0.435702 |
| C | -1.778660 | -1.503588 | 0.050492  | 0.036891  |
| C | -3.161486 | -2.622220 | 1.866728  | -0.337375 |
| O | -1.206178 | -1.261533 | 3.541172  | -0.493968 |
| C | -0.535106 | 1.169483  | 1.825433  | -0.375173 |
| C | 0.403107  | 2.203648  | 1.245750  | 0.159067  |
| C | 0.104840  | 2.847318  | 0.036823  | -0.184443 |
| C | 0.961951  | 3.817053  | -0.486958 | -0.134099 |
| C | 2.132718  | 4.158598  | 0.193769  | -0.131111 |
| C | 2.438574  | 3.528090  | 1.402420  | -0.133106 |
| C | 1.577892  | 2.560572  | 1.924346  | -0.194322 |
| C | -2.878915 | -0.771057 | -0.645305 | 0.386539  |
| O | -3.187106 | 0.490818  | -0.208238 | -0.485182 |

|   |           |           |           |           |
|---|-----------|-----------|-----------|-----------|
| C | -4.265785 | 0.927978  | -0.938626 | 0.362592  |
| C | -4.636665 | -0.042042 | -1.824635 | -0.215182 |
| C | -3.741958 | -1.143068 | -1.633792 | -0.203498 |
| C | -4.779275 | 2.288717  | -0.626314 | -0.535289 |
| H | 3.127266  | 1.807801  | -2.171346 | 0.187141  |
| H | 3.912063  | 1.405282  | -0.647087 | 0.174497  |
| H | 4.610766  | 0.842657  | -2.187507 | 0.165028  |
| H | 5.474161  | -0.597658 | 0.240305  | 0.189693  |
| H | 2.586066  | -0.626770 | -2.564421 | 0.174608  |
| H | 2.288924  | -2.966902 | -1.421124 | 0.176917  |
| H | 4.684705  | -1.654984 | -2.024619 | 0.186658  |
| H | 4.009305  | -1.580684 | 2.233389  | 0.183938  |
| H | 3.776401  | -3.768668 | -0.930301 | 0.220751  |
| H | 2.181520  | -3.213140 | 1.226919  | 0.186808  |
| H | 1.909160  | 0.297129  | 0.282267  | 0.173054  |
| H | -0.701682 | -2.090237 | -2.147605 | 0.169934  |
| H | 0.939629  | -1.822107 | -2.667807 | 0.170682  |
| H | -0.662817 | -0.621914 | -4.132126 | 0.179092  |
| H | -1.286815 | 0.301609  | -2.757084 | 0.185110  |
| H | 0.381328  | 0.549430  | -3.303811 | 0.167008  |
| H | 0.798565  | -0.574150 | 1.795874  | 0.179133  |
| H | -1.561754 | 1.369251  | 1.504749  | 0.185166  |
| H | -0.522894 | 1.226060  | 2.919894  | 0.200556  |
| H | 3.334224  | 3.807049  | 1.950888  | 0.150144  |
| H | 2.792362  | 4.924352  | -0.204486 | 0.151496  |
| H | 0.707036  | 4.318697  | -1.416664 | 0.146477  |
| H | -0.815011 | 2.596794  | -0.486576 | 0.134898  |
| H | 1.807167  | 2.096137  | 2.881516  | 0.140252  |
| H | -1.638033 | -2.451360 | -0.481787 | 0.176638  |
| H | -5.103117 | 2.361991  | 0.418555  | 0.191602  |
| H | -4.013220 | 3.056072  | -0.790161 | 0.182069  |
| H | -5.634626 | 2.517462  | -1.266642 | 0.189206  |
| H | -3.750205 | -2.088057 | -2.160919 | 0.161786  |
| H | -5.455562 | 0.017762  | -2.527558 | 0.168295  |
| H | -4.113821 | -2.189496 | 1.543833  | 0.187997  |
| H | -3.068816 | -3.632608 | 1.451202  | 0.170070  |
| H | -3.135154 | -2.674645 | 2.956163  | 0.220764  |

#### TS14 (E)-b2 $\alpha$ -endo

B3LYP/6-31G(d) energy= -1308.4115486000

Zero-point correction (ZPC)= 0.548794

HF/6-31G(d)// B3LYP/6-31G(d) energy= -1299.976908

CPCM:HF/6-31G(d)// B3LYP/6-31G(d) ( $\epsilon$ =78.39) energy= -1300.030494

Number of Imaginary Frequencies=1

|   |           |           |           |           |
|---|-----------|-----------|-----------|-----------|
| C | 3.281443  | 1.509650  | 0.757599  | -0.335590 |
| C | 1.972449  | 1.745424  | 1.435676  | -0.086513 |
| C | 1.468541  | 2.968596  | 1.055330  | -0.099952 |
| C | 2.275504  | 3.484073  | 0.012363  | -0.077316 |
| C | 3.234505  | 2.524397  | -0.374229 | -0.178282 |
| C | 2.352089  | 1.496295  | -1.834827 | -0.147428 |
| C | 3.569432  | 0.894263  | -2.524627 | -0.465268 |
| C | 1.424332  | 0.576532  | -1.262766 | -0.194626 |
| C | 0.033612  | 0.753954  | -1.195135 | 0.402347  |
| C | -0.590904 | 2.085147  | -1.563642 | -0.383923 |
| C | -0.976192 | 2.177000  | -3.056606 | -0.458323 |
| N | -0.780809 | -0.277437 | -0.883207 | -0.468723 |
| C | -0.391666 | -1.705559 | -0.878244 | -0.080306 |
| C | -1.661627 | -2.390969 | -1.410237 | 0.605481  |
| N | -2.672428 | -1.472366 | -1.388477 | -0.442337 |
| C | -2.275785 | -0.179660 | -0.869566 | 0.045850  |
| C | -0.016845 | -2.351734 | 0.482467  | -0.370888 |
| C | 1.420085  | -2.239079 | 0.951681  | 0.168901  |
| C | 2.480334  | -2.702466 | 0.156751  | -0.201207 |

|   |           |           |           |           |
|---|-----------|-----------|-----------|-----------|
| C | 3.795431  | -2.666168 | 0.624907  | -0.134037 |
| C | 4.072069  | -2.179838 | 1.905735  | -0.136974 |
| C | 3.024279  | -1.733178 | 2.712979  | -0.133495 |
| C | 1.710990  | -1.760010 | 2.235742  | -0.203666 |
| O | -1.734897 | -3.553980 | -1.753118 | -0.488087 |
| C | -4.031616 | -1.762257 | -1.819416 | -0.337790 |
| C | -2.853653 | 0.098551  | 0.487037  | 0.382681  |
| C | -3.353789 | -0.683092 | 1.486384  | -0.208684 |
| C | -3.770419 | 0.210790  | 2.525106  | -0.216114 |
| C | -3.503124 | 1.477252  | 2.093991  | 0.360460  |
| O | -2.939227 | 1.421121  | 0.841334  | -0.488332 |
| C | -3.709930 | 2.829804  | 2.677936  | -0.532326 |
| H | 4.137733  | 2.828627  | -0.894174 | 0.183268  |
| H | 1.930538  | 2.330349  | -2.389323 | 0.175222  |
| H | 1.828429  | -0.377110 | -0.943328 | 0.170246  |
| H | 0.585435  | 3.448178  | 1.461635  | 0.173098  |
| H | 2.133558  | 4.447468  | -0.467991 | 0.184492  |
| H | 3.488696  | 0.471592  | 0.494758  | 0.202889  |
| H | 1.556510  | 1.084663  | 2.186090  | 0.182589  |
| H | 4.083666  | 1.822561  | 1.448050  | 0.216512  |
| H | 4.068058  | 0.150975  | -1.894503 | 0.174370  |
| H | 3.243567  | 0.386033  | -3.440185 | 0.189710  |
| H | 4.298247  | 1.656112  | -2.813448 | 0.174985  |
| H | -3.434896 | -1.761403 | 1.482998  | 0.171037  |
| H | -4.227045 | -0.056997 | 3.467643  | 0.167819  |
| H | -4.167984 | 2.739658  | 3.665923  | 0.190334  |
| H | -4.369176 | 3.440504  | 2.049717  | 0.189378  |
| H | -2.763007 | 3.372265  | 2.789370  | 0.169280  |
| H | -2.589817 | 0.611615  | -1.554754 | 0.188476  |
| H | -4.742572 | -1.606107 | -1.002642 | 0.183973  |
| H | -4.053289 | -2.808213 | -2.129260 | 0.221490  |
| H | -4.312940 | -1.126500 | -2.666898 | 0.176049  |
| H | 0.405941  | -1.859500 | -1.609694 | 0.194478  |
| H | -0.102109 | 2.044940  | -3.701537 | 0.170536  |
| H | -1.410939 | 3.158827  | -3.266918 | 0.184601  |
| H | -1.709551 | 1.416616  | -3.344411 | 0.170855  |
| H | -1.458867 | 2.283880  | -0.930353 | 0.199491  |
| H | 0.897234  | -1.432915 | 2.879924  | 0.138743  |
| H | 0.126269  | 2.877006  | -1.335068 | 0.168079  |
| H | 5.092450  | -2.170209 | 2.277989  | 0.155408  |
| H | 3.225675  | -1.378028 | 3.720107  | 0.151572  |
| H | 2.277331  | -3.125660 | -0.825209 | 0.148716  |
| H | 4.600309  | -3.042709 | -0.000378 | 0.155571  |
| H | -0.694532 | -1.965017 | 1.249904  | 0.166354  |
| H | -0.254537 | -3.416324 | 0.357701  | 0.214440  |

#### TS14 (E)-b2 $\alpha$ -exo

B3LYP/6-31G(d) energy= -1308.4067458000

Zero-point correction (ZPC)= 0.548663

HF/6-31G(d)// B3LYP/6-31G(d) energy= -1299.97196

CPCM:HF/6-31G(d)// B3LYP/6-31G(d) ( $\epsilon$ =78.39) energy= -1300.025784

Number of Imaginary Frequencies=1

|   |           |          |           |           |
|---|-----------|----------|-----------|-----------|
| C | 2.248877  | 2.182041 | 2.161573  | -0.339218 |
| C | 2.245502  | 0.690278 | 2.237511  | -0.097299 |
| C | 3.394107  | 0.196646 | 1.670163  | -0.085313 |
| C | 4.100708  | 1.272735 | 1.074659  | -0.054791 |
| C | 3.331588  | 2.447954 | 1.129382  | -0.198544 |
| C | 2.343050  | 2.405742 | -0.638263 | -0.143556 |
| C | 1.381339  | 1.355253 | -0.641024 | -0.185528 |
| C | -0.000895 | 1.537371 | -0.481821 | 0.394340  |
| C | -0.575623 | 2.890707 | -0.098255 | -0.377876 |
| C | -0.905598 | 3.775799 | -1.320720 | -0.458351 |
| C | 3.461656  | 2.350692 | -1.663800 | -0.463851 |

|   |           |           |           |           |
|---|-----------|-----------|-----------|-----------|
| N | -0.874950 | 0.546736  | -0.768216 | -0.472980 |
| C | -2.360359 | 0.733219  | -0.716727 | 0.037550  |
| N | -2.815324 | -0.157907 | -1.769758 | -0.431139 |
| C | -1.852031 | -0.987937 | -2.259699 | 0.599722  |
| C | -0.548554 | -0.701558 | -1.498565 | -0.068904 |
| C | -2.973577 | 0.469638  | 0.621428  | 0.385760  |
| C | -3.784054 | 1.224366  | 1.418731  | -0.204118 |
| C | -4.117233 | 0.407432  | 2.545932  | -0.216468 |
| C | -3.494357 | -0.793028 | 2.361365  | 0.360883  |
| O | -2.789742 | -0.766313 | 1.182502  | -0.480720 |
| C | -3.444340 | -2.057443 | 3.143380  | -0.533051 |
| C | -0.198911 | -1.960253 | -0.658140 | -0.378657 |
| C | 1.257574  | -2.307373 | -0.411409 | 0.168069  |
| C | 1.631427  | -2.848151 | 0.826843  | -0.193212 |
| C | 2.925303  | -3.327051 | 1.043615  | -0.142754 |
| C | 3.879860  | -3.250755 | 0.026653  | -0.136880 |
| C | 3.523548  | -2.706131 | -1.209133 | -0.131659 |
| C | 2.221513  | -2.251087 | -1.429050 | -0.197899 |
| O | -1.983823 | -1.839983 | -3.116219 | -0.490083 |
| C | -4.204939 | -0.205356 | -2.192283 | -0.337456 |
| H | 1.737929  | 0.370212  | -0.922008 | 0.170095  |
| H | 2.607886  | 2.582517  | 3.124838  | 0.219611  |
| H | 1.272775  | 2.635395  | 1.987117  | 0.181077  |
| H | 1.484985  | 0.106903  | 2.743840  | 0.180001  |
| H | 3.696531  | -0.842250 | 1.641529  | 0.188469  |
| H | 5.060513  | 1.179706  | 0.577766  | 0.187325  |
| H | 3.786987  | 3.429020  | 1.025625  | 0.183688  |
| H | 3.062320  | 2.651261  | -2.640651 | 0.185795  |
| H | 1.952216  | 3.412021  | -0.499879 | 0.177350  |
| H | 3.864966  | 1.339489  | -1.769228 | 0.174085  |
| H | 4.280641  | 3.034604  | -1.420533 | 0.171560  |
| H | -1.331804 | 4.726260  | -0.985621 | 0.185518  |
| H | -0.004030 | 3.991755  | -1.901602 | 0.171414  |
| H | -1.623434 | 3.305505  | -2.000050 | 0.173958  |
| H | 0.145250  | 3.424222  | 0.523284  | 0.171295  |
| H | -1.459053 | 2.755238  | 0.530713  | 0.183699  |
| H | -0.742336 | -1.905098 | 0.289222  | 0.178178  |
| H | -0.636067 | -2.798981 | -1.215878 | 0.219091  |
| H | 0.232334  | -0.485510 | -2.232437 | 0.191975  |
| H | 4.251004  | -2.663568 | -2.015137 | 0.152044  |
| H | 1.951060  | -1.886830 | -2.417811 | 0.145084  |
| H | 4.884925  | -3.629824 | 0.188291  | 0.154101  |
| H | 3.183620  | -3.768328 | 2.002717  | 0.151564  |
| H | 0.890457  | -2.926784 | 1.619614  | 0.132349  |
| H | -4.521100 | 0.762377  | -2.598592 | 0.172319  |
| H | -4.858954 | -0.473503 | -1.356115 | 0.185582  |
| H | -4.277488 | -0.966141 | -2.970796 | 0.221578  |
| H | -2.615315 | 1.761813  | -0.984188 | 0.178245  |
| H | -4.120419 | 2.234304  | 1.223701  | 0.162564  |
| H | -4.748063 | 0.675488  | 3.381710  | 0.167613  |
| H | -2.417972 | -2.310446 | 3.435552  | 0.174533  |
| H | -4.042568 | -1.954905 | 4.051991  | 0.189207  |
| H | -3.840863 | -2.899855 | 2.564513  | 0.192697  |

#### TS14 (E)-b2δ-endo

B3LYP/6-31G(d) energy= -1308.4104266000

Zero-point correction (ZPC)= 0.548962

HF/6-31G(d)// B3LYP/6-31G(d) energy= -1299.97614

CPCM:HF/6-31G(d)// B3LYP/6-31G(d) (ε=78.39) energy= -1300.02956

Number of Imaginary Frequencies=1

|   |           |           |           |           |
|---|-----------|-----------|-----------|-----------|
| C | -3.957375 | -1.900867 | 0.376029  | -0.055133 |
| C | -3.066303 | -2.902697 | -0.045811 | -0.198131 |
| C | -1.996585 | -2.980080 | 1.030472  | -0.339525 |

|   |           |           |           |           |
|---|-----------|-----------|-----------|-----------|
| C | -2.149960 | -1.664849 | 1.721961  | -0.097376 |
| C | -3.356733 | -1.103890 | 1.383969  | -0.086354 |
| C | -2.128934 | -2.023390 | -1.609491 | -0.142925 |
| C | -3.268903 | -1.663776 | -2.546397 | -0.463502 |
| C | -1.284942 | -0.973316 | -1.148581 | -0.186583 |
| C | 0.112160  | -1.057641 | -1.040126 | 0.390570  |
| C | 0.837727  | -2.380326 | -1.224857 | -0.387718 |
| C | 1.284932  | -2.625347 | -2.683285 | -0.457527 |
| N | 0.863035  | 0.053559  | -0.872633 | -0.465238 |
| C | 0.399492  | 1.444342  | -1.077530 | -0.078044 |
| C | 1.631543  | 2.105106  | -1.719284 | 0.599642  |
| N | 2.693439  | 1.263751  | -1.545143 | -0.441245 |
| C | 2.362507  | 0.045148  | -0.836809 | 0.046052  |
| C | 0.004365  | 2.261922  | 0.182763  | -0.372705 |
| C | -1.452786 | 2.293607  | 0.603723  | 0.168344  |
| C | -1.787198 | 2.176206  | 1.959485  | -0.193684 |
| C | -3.103016 | 2.355043  | 2.393387  | -0.141820 |
| C | -4.113433 | 2.633226  | 1.470150  | -0.138345 |
| C | -3.795224 | 2.740423  | 0.113875  | -0.130822 |
| C | -2.475246 | 2.583033  | -0.312698 | -0.197078 |
| O | 1.641332  | 3.198056  | -2.249080 | -0.487236 |
| C | 4.037833  | 1.555263  | -2.019147 | -0.337851 |
| C | 2.935415  | 0.005095  | 0.548894  | 0.382804  |
| O | 3.079406  | -1.244492 | 1.097014  | -0.487998 |
| C | 3.630919  | -1.086398 | 2.346276  | 0.361224  |
| C | 3.833809  | 0.241627  | 2.584334  | -0.216662 |
| C | 3.387050  | 0.949993  | 1.422336  | -0.207828 |
| C | 3.892624  | -2.325648 | 3.126586  | -0.532185 |
| H | -1.750268 | -0.004635 | -0.999637 | 0.168479  |
| H | -1.445725 | -1.268894 | 2.444685  | 0.180595  |
| H | -3.768336 | -0.186434 | 1.784738  | 0.187380  |
| H | -4.932115 | -1.711262 | -0.060756 | 0.186872  |
| H | -3.417323 | -3.792802 | -0.560783 | 0.183631  |
| H | -1.628576 | -2.946461 | -1.895933 | 0.178325  |
| H | -2.291832 | -3.781429 | 1.728851  | 0.218873  |
| H | -4.006436 | -2.467988 | -2.629069 | 0.171588  |
| H | -0.981861 | -3.213712 | 0.707420  | 0.181704  |
| H | -3.778031 | -0.747990 | -2.232543 | 0.173111  |
| H | -2.860851 | -1.488238 | -3.549732 | 0.186043  |
| H | 4.266326  | 0.668372  | 3.478420  | 0.167562  |
| H | 3.416734  | 2.018467  | 1.259008  | 0.170613  |
| H | 4.589358  | -2.989473 | 2.601080  | 0.188878  |
| H | 4.331368  | -2.067703 | 4.093534  | 0.189496  |
| H | 2.970500  | -2.890737 | 3.308982  | 0.172690  |
| H | 4.357332  | 0.812604  | -2.759462 | 0.175702  |
| H | 4.006466  | 2.540791  | -2.486354 | 0.221460  |
| H | 4.751280  | 1.564086  | -1.189782 | 0.184217  |
| H | -0.405671 | 1.446524  | -1.815940 | 0.194034  |
| H | 2.730619  | -0.819904 | -1.392492 | 0.188437  |
| H | 0.629511  | 1.935060  | 1.019219  | 0.167607  |
| H | 0.300881  | 3.294497  | -0.044901 | 0.215556  |
| H | -1.003744 | 1.978707  | 2.687974  | 0.136666  |
| H | -2.238531 | 2.728850  | -1.364734 | 0.146156  |
| H | -4.569930 | 2.978185  | -0.609906 | 0.152839  |
| H | -5.135607 | 2.784337  | 1.805498  | 0.154517  |
| H | -3.335180 | 2.289155  | 3.453102  | 0.152283  |
| H | 1.813813  | -3.580819 | -2.751144 | 0.186234  |
| H | 1.954736  | -1.843594 | -3.055705 | 0.171787  |
| H | 1.689958  | -2.439440 | -0.543431 | 0.203086  |
| H | 0.173617  | -3.195321 | -0.933197 | 0.168466  |
| H | 0.423847  | -2.663344 | -3.357394 | 0.169930  |

#### TS14 (E)-b2δ-exo

B3LYP/6-31G(d) energy= -1308.4060915000

Zero-point correction (ZPC)= 0.548694  
HF/6-31G(d)// B3LYP/6-31G(d) energy= -1299.97614  
CPCM:HF/6-31G(d)// B3LYP/6-31G(d) ( $\epsilon=78.39$ ) energy= -  
1300.025388

Number of Imaginary Frequencies=1

|   |           |           |           |           |
|---|-----------|-----------|-----------|-----------|
| C | -3.957375 | -1.900867 | 0.376029  | -0.055133 |
| C | -3.066303 | -2.902697 | -0.045811 | -0.198131 |
| C | -1.996585 | -2.980080 | 1.030472  | -0.339525 |
| C | -2.149960 | -1.664849 | 1.721961  | -0.097376 |
| C | -3.356733 | -1.103890 | 1.383969  | -0.086354 |
| C | -2.128934 | -2.023390 | -1.609491 | -0.142925 |
| C | -3.268903 | -1.663776 | -2.546397 | -0.463502 |
| C | -1.284942 | -0.973316 | -1.148581 | -0.186583 |
| C | 0.112160  | -1.057641 | -1.040126 | 0.390570  |
| C | 0.837727  | -2.380326 | -1.224857 | -0.387718 |
| C | 1.284932  | -2.625347 | -2.683285 | -0.457527 |
| N | 0.863035  | 0.053559  | -0.872633 | -0.465238 |
| C | 0.399492  | 1.444342  | -1.077530 | -0.078044 |
| C | 1.631543  | 2.105106  | -1.719284 | 0.599642  |
| N | 2.693439  | 1.263751  | -1.545143 | -0.441245 |
| C | 2.362507  | 0.045148  | -0.836809 | 0.046052  |
| C | 0.004365  | 2.261922  | 0.182763  | -0.372705 |
| C | -1.452786 | 2.293607  | 0.603723  | 0.168344  |
| C | -1.787198 | 2.176206  | 1.959485  | -0.193684 |
| C | -3.103016 | 2.355043  | 2.393387  | -0.141820 |
| C | -4.113433 | 2.633226  | 1.470150  | -0.138345 |
| C | -3.795224 | 2.740423  | 0.113875  | -0.130822 |
| C | -2.475246 | 2.583033  | -0.312698 | -0.197078 |
| O | 1.641332  | 3.198056  | -2.249080 | -0.487236 |
| C | 4.037833  | 1.555263  | -2.019147 | -0.337851 |
| C | 2.935415  | 0.005095  | 0.548894  | 0.382804  |
| O | 3.079406  | -1.244492 | 1.097014  | -0.487998 |
| C | 3.630919  | -1.086398 | 2.346276  | 0.361224  |
| C | 3.833809  | 0.241627  | 2.584334  | -0.216662 |
| C | 3.387050  | 0.949993  | 1.422336  | -0.207828 |
| C | 3.892624  | -2.325648 | 3.126586  | -0.532185 |
| H | -1.750268 | -0.004635 | -0.999637 | 0.168479  |
| H | -1.445725 | -1.268894 | 2.444685  | 0.180595  |
| H | -3.768336 | -0.186434 | 1.784738  | 0.187380  |
| H | -4.932115 | -1.711262 | -0.060756 | 0.186872  |
| H | -3.417323 | -3.792802 | -0.560783 | 0.183631  |
| H | -1.628576 | -2.946461 | -1.895933 | 0.178325  |
| H | -2.291832 | -3.781429 | 1.728851  | 0.218873  |
| H | -4.006436 | -2.467988 | -2.629069 | 0.171588  |
| H | -0.981861 | -3.213712 | 0.707420  | 0.181704  |
| H | -3.778031 | -0.747990 | -2.232543 | 0.173111  |
| H | -2.860851 | -1.488238 | -3.549732 | 0.186043  |
| H | 4.266326  | 0.668372  | 3.478420  | 0.167562  |
| H | 3.416734  | 2.018467  | 1.259008  | 0.170613  |
| H | 4.589358  | -2.989473 | 2.601080  | 0.188878  |
| H | 4.331368  | -2.067703 | 4.093534  | 0.189496  |
| H | 2.970500  | -2.890737 | 3.308982  | 0.172690  |
| H | 4.357332  | 0.812604  | -2.759462 | 0.175702  |
| H | 4.006466  | 2.540791  | -2.486354 | 0.221460  |
| H | 4.751280  | 1.564086  | -1.189782 | 0.184217  |
| H | -0.405671 | 1.446524  | -1.815940 | 0.194034  |
| H | 2.730619  | -0.819904 | -1.392492 | 0.188437  |
| H | 0.629511  | 1.935060  | 1.019219  | 0.167607  |
| H | 0.300881  | 3.294497  | -0.044901 | 0.215556  |
| H | -1.003744 | 1.978707  | 2.687974  | 0.136666  |
| H | -2.238531 | 2.728850  | -1.364734 | 0.146156  |
| H | -4.569930 | 2.978185  | -0.609906 | 0.152839  |
| H | -5.135607 | 2.784337  | 1.805498  | 0.154517  |
| H | -3.335180 | 2.289155  | 3.453102  | 0.152283  |

|   |          |           |           |          |
|---|----------|-----------|-----------|----------|
| H | 1.813813 | -3.580819 | -2.751144 | 0.186234 |
| H | 1.954736 | -1.843594 | -3.055705 | 0.171787 |
| H | 1.689958 | -2.439440 | -0.543431 | 0.203086 |
| H | 0.173617 | -3.195321 | -0.933197 | 0.168466 |
| H | 0.423847 | -2.663344 | -3.357394 | 0.169930 |

#### TS14 (E)-c1a-endo

B3LYP/6-31G(d) energy= -1308.4131157000

Zero-point correction (ZPC)= 0.548553

HF/6-31G(d)// B3LYP/6-31G(d) energy= -1299.979571

CPCM:HF/6-31G(d)// B3LYP/6-31G(d) ( $\epsilon=78.39$ ) energy= -  
1300.03787

Number of Imaginary Frequencies=1

|   |           |           |           |           |
|---|-----------|-----------|-----------|-----------|
| C | 2.101012  | -3.174319 | 1.902318  | -0.099677 |
| C | 2.635348  | -1.903344 | 1.943010  | -0.098006 |
| C | 3.693429  | -1.774493 | 0.896179  | -0.330427 |
| C | 3.365619  | -2.942686 | -0.022834 | -0.178602 |
| C | 2.605378  | -3.839815 | 0.761781  | -0.072738 |
| C | 2.076108  | -2.155699 | -1.288497 | -0.151761 |
| C | 3.012840  | -1.622379 | -2.365554 | -0.465902 |
| C | 1.288369  | -1.193529 | -0.588837 | -0.201182 |
| C | -0.012447 | -1.401376 | -0.091638 | 0.410585  |
| C | -0.704306 | -2.731501 | -0.295848 | -0.358760 |
| C | -1.322577 | -2.886828 | -1.702576 | -0.456561 |
| N | -0.673855 | -0.396543 | 0.513178  | -0.478211 |
| C | -2.032811 | -0.494182 | 1.123864  | 0.038897  |
| N | -2.026646 | 0.639521  | 2.038165  | -0.437847 |
| C | -0.976667 | 1.494192  | 1.872634  | 0.605165  |
| C | -0.060956 | 0.910410  | 0.799311  | -0.062618 |
| C | -3.147977 | -0.455442 | 0.131486  | 0.383220  |
| O | -3.146729 | 0.584643  | -0.759912 | -0.484970 |
| C | -4.278254 | 0.466869  | -1.528964 | 0.361596  |
| C | -4.987588 | -0.629626 | -1.129014 | -0.215851 |
| C | -4.257952 | -1.226405 | -0.051246 | -0.202712 |
| C | -4.487218 | 1.502204  | -2.576468 | -0.532964 |
| C | 0.074564  | 1.860126  | -0.434698 | -0.362875 |
| C | 1.427343  | 2.539864  | -0.523210 | 0.143493  |
| C | 2.218159  | 2.401231  | -1.671816 | -0.202475 |
| C | 3.464357  | 3.026747  | -1.762486 | -0.132616 |
| C | 3.936313  | 3.797249  | -0.699596 | -0.128508 |
| C | 3.153839  | 3.943943  | 0.448737  | -0.132276 |
| C | 1.907761  | 3.322979  | 0.538140  | -0.197453 |
| O | -0.789989 | 2.543455  | 2.461398  | -0.492174 |
| C | -3.141557 | 0.909595  | 2.931247  | -0.338384 |
| H | 2.430219  | -1.151641 | 2.697438  | 0.191116  |
| H | 1.399974  | -3.592252 | 2.615914  | 0.176785  |
| H | 2.383267  | -4.867075 | 0.489835  | 0.186542  |
| H | 4.102119  | -3.320980 | -0.725344 | 0.186503  |
| H | 4.666774  | -1.990802 | 1.369179  | 0.222899  |
| H | 3.782363  | -0.789761 | 0.434863  | 0.196291  |
| H | 1.569340  | -3.065779 | -1.596897 | 0.175481  |
| H | 1.707335  | -0.196279 | -0.523856 | 0.176326  |
| H | 3.696050  | -2.391077 | -2.736194 | 0.174255  |
| H | 2.411908  | -1.278142 | -3.215987 | 0.188600  |
| H | 3.599558  | -0.768739 | -2.011989 | 0.178572  |
| H | 0.925272  | 0.743192  | 1.247622  | 0.186738  |
| H | 1.847977  | 1.815700  | -2.511348 | 0.124979  |
| H | 4.059022  | 2.918556  | -2.665557 | 0.143624  |
| H | 4.902770  | 4.288433  | -0.768153 | 0.149795  |
| H | 3.510320  | 4.552936  | 1.274901  | 0.151593  |
| H | 1.294992  | 3.451451  | 1.427307  | 0.176846  |
| H | -0.113326 | 1.278538  | -1.342195 | 0.165805  |
| H | -0.722054 | 2.610126  | -0.378826 | 0.200342  |
| H | -4.071100 | 1.045553  | 2.368920  | 0.188128  |

|   |           |           |           |          |
|---|-----------|-----------|-----------|----------|
| H | -3.271615 | 0.089255  | 3.646154  | 0.172079 |
| H | -2.904578 | 1.827532  | 3.470943  | 0.221075 |
| H | -2.089901 | -2.130426 | -1.883177 | 0.188697 |
| H | -1.791726 | -3.871709 | -1.788675 | 0.179084 |
| H | -0.565416 | -2.799517 | -2.487053 | 0.164580 |
| H | 0.033275  | -3.524979 | -0.132465 | 0.168630 |
| H | -1.482544 | -2.885730 | 0.454266  | 0.169933 |
| H | -2.123635 | -1.424545 | 1.697726  | 0.177472 |
| H | -4.531998 | -2.108681 | 0.512068  | 0.161608 |
| H | -5.923760 | -0.969687 | -1.548880 | 0.167667 |
| H | -3.662625 | 1.514236  | -3.299027 | 0.181067 |
| H | -4.557370 | 2.504341  | -2.137456 | 0.191102 |
| H | -5.414421 | 1.299610  | -3.117892 | 0.188307 |

**TS14 (E)-c1 $\alpha$ -exo**

B3LYP/6-31G(d) energy= -1308.4120726000

Zero-point correction (ZPC)= 0.548572

HF/6-31G(d)// B3LYP/6-31G(d) energy= -1299.978372

CPCM:HF/6-31G(d)// B3LYP/6-31G(d) ( $\epsilon$ =78.39) energy= -1300.034695

Number of Imaginary Frequencies=1

|   |           |           |           |           |
|---|-----------|-----------|-----------|-----------|
| C | 2.622038  | -2.878820 | 1.611446  | -0.333975 |
| C | 2.714614  | -1.451291 | 2.046937  | -0.098820 |
| C | 3.706594  | -0.815617 | 1.334644  | -0.095027 |
| C | 4.171022  | -1.694589 | 0.326635  | -0.049769 |
| C | 3.371966  | -2.856810 | 0.289678  | -0.196725 |
| C | 1.955741  | -2.434990 | -1.046590 | -0.148867 |
| C | 2.740461  | -2.146656 | -2.315723 | -0.464877 |
| C | 1.136461  | -1.400466 | -0.512331 | -0.189294 |
| C | -0.145362 | -1.556303 | 0.046280  | 0.390998  |
| C | -0.859662 | -2.892081 | -0.005401 | -0.358237 |
| C | -1.502831 | -3.176880 | -1.379724 | -0.454963 |
| N | -0.784979 | -0.484259 | 0.556106  | -0.470561 |
| C | -2.147852 | -0.485102 | 1.165813  | 0.029407  |
| N | -2.081006 | 0.683553  | 2.033694  | -0.434049 |
| C | -1.001205 | 1.486548  | 1.811626  | 0.603390  |
| C | -0.128588 | 0.817229  | 0.752929  | -0.065383 |
| C | -3.256957 | -0.425181 | 0.167451  | 0.387283  |
| O | -3.214834 | 0.599044  | -0.741444 | -0.484002 |
| C | -4.346117 | 0.508581  | -1.514236 | 0.362580  |
| C | -5.095961 | -0.554882 | -1.099670 | -0.216144 |
| C | -4.393166 | -1.158910 | -0.008085 | -0.203510 |
| C | -4.513298 | 1.532772  | -2.579966 | -0.532957 |
| C | 0.015963  | 1.704179  | -0.526529 | -0.363406 |
| C | 1.406643  | 2.287705  | -0.690781 | 0.145055  |
| C | 1.992667  | 3.038314  | 0.340906  | -0.198697 |
| C | 3.275707  | 3.566118  | 0.189828  | -0.138067 |
| C | 3.989842  | 3.358203  | -0.993489 | -0.131243 |
| C | 3.411237  | 2.622855  | -2.028503 | -0.133885 |
| C | 2.128548  | 2.089814  | -1.875192 | -0.200245 |
| O | -0.759580 | 2.553383  | 2.346955  | -0.494041 |
| C | -3.175357 | 1.042407  | 2.920970  | -0.338322 |
| H | 1.613674  | -3.296510 | 1.597813  | 0.177940  |
| H | 2.160603  | -1.031054 | 2.879287  | 0.187823  |
| H | 3.546226  | -2.869364 | -2.477174 | 0.170326  |
| H | 3.165211  | -1.138658 | -2.306551 | 0.176334  |
| H | 2.062490  | -2.213512 | -3.175769 | 0.184582  |
| H | 3.208186  | -3.494775 | 2.314328  | 0.221385  |
| H | 4.971166  | -1.466837 | -0.369355 | 0.191306  |
| H | 4.056151  | 0.198305  | 1.491796  | 0.192107  |
| H | 1.531784  | -3.438260 | -1.034783 | 0.175217  |
| H | 3.743035  | -3.774788 | -0.158759 | 0.187257  |
| H | 1.517909  | -0.393389 | -0.629156 | 0.178516  |
| H | 0.862057  | 0.635881  | 1.185999  | 0.187881  |

|   |           |           |           |          |
|---|-----------|-----------|-----------|----------|
| H | 3.712539  | 4.154104  | 0.992458  | 0.151936 |
| H | 1.677451  | 1.529206  | -2.691695 | 0.129025 |
| H | 3.951833  | 2.470989  | -2.958886 | 0.145125 |
| H | 4.984729  | 3.778118  | -1.111838 | 0.150196 |
| H | 1.430621  | 3.220546  | 1.254181  | 0.175506 |
| H | -0.724579 | 2.509522  | -0.470629 | 0.202118 |
| H | -2.290580 | -1.384299 | 1.775725  | 0.179613 |
| H | -3.331721 | 0.264033  | 3.676313  | 0.172869 |
| H | -2.896751 | 1.975229  | 3.413216  | 0.220519 |
| H | -4.103907 | 1.188688  | 2.359444  | 0.187966 |
| H | -4.701725 | -2.020591 | 0.569037  | 0.162208 |
| H | -6.041861 | -0.868296 | -1.518452 | 0.167764 |
| H | -3.688842 | 1.499152  | -3.302088 | 0.180981 |
| H | -5.447665 | 1.357682  | -3.118631 | 0.188402 |
| H | -4.543596 | 2.544486  | -2.158703 | 0.190608 |
| H | -1.988480 | -4.157356 | -1.361361 | 0.179582 |
| H | -0.751047 | -3.182008 | -2.174244 | 0.164118 |
| H | -2.259399 | -2.428326 | -1.627194 | 0.186619 |
| H | -1.622103 | -2.960108 | 0.773028  | 0.170121 |
| H | -0.135673 | -3.682047 | 0.217695  | 0.172572 |
| H | -0.249417 | 1.102884  | -1.401262 | 0.167700 |

**TS14 (E)-c2 $\alpha$ -endo**

B3LYP/6-31G(d) energy= -1308.4125508000

Zero-point correction (ZPC)= 0.548823

HF/6-31G(d)// B3LYP/6-31G(d) energy= -1299.979057

CPCM:HF/6-31G(d)// B3LYP/6-31G(d) ( $\epsilon$ =78.39) energy= -1300.035042

Number of Imaginary Frequencies=1

|   |           |           |           |           |
|---|-----------|-----------|-----------|-----------|
| C | 2.541403  | 2.411248  | 1.449513  | -0.335326 |
| C | 1.145094  | 2.227711  | 1.947863  | -0.094665 |
| C | 0.391181  | 3.335828  | 1.630143  | -0.098037 |
| C | 1.153857  | 4.170221  | 0.779946  | -0.075605 |
| C | 2.364308  | 3.529241  | 0.431140  | -0.178071 |
| C | 1.970823  | 2.555819  | -1.230762 | -0.150536 |
| C | 3.374982  | 2.351982  | -1.787344 | -0.464392 |
| C | 1.231870  | 1.372515  | -0.922871 | -0.202466 |
| C | -0.158415 | 1.223051  | -1.065871 | 0.412017  |
| C | -1.037697 | 2.403619  | -1.417544 | -0.371073 |
| C | -1.210548 | 2.592550  | -2.940595 | -0.458358 |
| N | -0.729993 | 0.007803  | -0.977234 | -0.477077 |
| C | -2.189258 | -0.259036 | -1.133704 | 0.037559  |
| N | -2.188230 | -1.657350 | -1.534937 | -0.434004 |
| C | -0.990021 | -2.289470 | -1.364749 | 0.610044  |
| C | 0.022182  | -1.254656 | -0.870922 | -0.068189 |
| C | -2.990736 | 0.011507  | 0.100070  | 0.383258  |
| C | -4.114278 | 0.749988  | 0.332169  | -0.204081 |
| C | -4.450879 | 0.548872  | 1.709392  | -0.218028 |
| C | -3.515550 | -0.301509 | 2.225100  | 0.358779  |
| O | -2.613136 | -0.637696 | 1.245771  | -0.482244 |
| C | -3.305865 | -0.908988 | 3.566860  | -0.531801 |
| C | 0.546431  | -1.597568 | 0.559106  | -0.366013 |
| C | 1.965208  | -2.134490 | 0.573918  | 0.153697  |
| C | 2.345423  | -3.194491 | -0.263384 | -0.195694 |
| C | 3.651034  | -3.685480 | -0.231989 | -0.129961 |
| C | 4.594448  | -3.133560 | 0.637779  | -0.126551 |
| C | 4.223567  | -2.087690 | 1.482975  | -0.129182 |
| C | 2.917903  | -1.592355 | 1.447046  | -0.207590 |
| O | -0.756380 | -3.469309 | -1.550532 | -0.489387 |
| C | -3.409191 | -2.350526 | -1.912152 | -0.338165 |
| H | 1.427386  | 3.335965  | -1.757397 | 0.176024  |
| H | 3.299277  | 1.910109  | -2.787898 | 0.192574  |
| H | 3.963656  | 1.666595  | -1.169368 | 0.178145  |
| H | 3.920197  | 3.294600  | -1.883207 | 0.175101  |



|   |           |           |           |          |
|---|-----------|-----------|-----------|----------|
| H | -0.624241 | 3.529158  | 1.956531  | 0.180272 |
| H | 0.827717  | 5.130681  | 0.392735  | 0.187389 |
| H | 3.214968  | 4.116312  | 0.097798  | 0.187224 |
| H | 0.823070  | 1.400220  | 2.570025  | 0.187731 |
| H | 3.039890  | 1.502286  | 1.108161  | 0.195179 |
| H | 1.815764  | 0.495246  | -0.664130 | 0.174016 |
| H | 3.149760  | 2.813564  | 2.277724  | 0.221165 |
| H | -2.600267 | 0.358336  | -1.939544 | 0.180007 |
| H | 4.945784  | -1.661200 | 2.173906  | 0.141298 |
| H | 1.610086  | -3.644534 | -0.925964 | 0.179412 |
| H | 3.929036  | -4.509192 | -0.883484 | 0.153783 |
| H | 5.608386  | -3.522222 | 0.662352  | 0.150961 |
| H | 2.629745  | -0.793260 | 2.128080  | 0.110711 |
| H | -0.137870 | -2.323007 | 1.013207  | 0.199922 |
| H | 0.858218  | -1.224920 | -1.576654 | 0.203334 |
| H | 0.483629  | -0.695322 | 1.174819  | 0.151002 |
| H | -3.136866 | -3.384106 | -2.130269 | 0.221651 |
| H | -3.851935 | -1.894365 | -2.804627 | 0.174111 |
| H | -4.141207 | -2.330407 | -1.097844 | 0.185332 |
| H | -4.085785 | -0.570268 | 4.253114  | 0.188966 |
| H | -3.343025 | -2.003573 | 3.518191  | 0.193750 |
| H | -2.332688 | -0.630550 | 3.988861  | 0.173181 |
| H | -5.288695 | 0.973793  | 2.244142  | 0.167540 |
| H | -4.650637 | 1.352353  | -0.389333 | 0.163744 |
| H | -1.856182 | 3.453933  | -3.136293 | 0.184347 |
| H | -2.012383 | 2.297132  | -0.934209 | 0.180278 |
| H | -0.592587 | 3.308032  | -0.995055 | 0.168179 |
| H | -0.248534 | 2.768520  | -3.431322 | 0.172385 |
| H | -1.663637 | 1.716967  | -3.416562 | 0.172305 |

**TS14 (E)-c2a-exo**

B3LYP/6-31G(d) energy= -1308.4095108000

Zero-point correction (ZPC)= 0.548867

HF/6-31G(d)// B3LYP/6-31G(d) energy= -1299.976059

CPCM:HF/6-31G(d)// B3LYP/6-31G(d) ( $\epsilon=78.39$ ) energy= -1300.032288

Number of Imaginary Frequencies=1

|   |           |           |           |           |
|---|-----------|-----------|-----------|-----------|
| C | -1.479877 | -3.333082 | 1.531950  | -0.337800 |
| C | -2.660158 | -3.447862 | 0.580922  | -0.198537 |
| C | -3.592060 | -2.484480 | 1.015863  | -0.049548 |
| C | -2.961460 | -1.548102 | 1.872253  | -0.092858 |
| C | -1.676293 | -1.971937 | 2.114803  | -0.095976 |
| C | -1.975989 | -2.699550 | -1.133463 | -0.146256 |
| C | -3.224791 | -2.557580 | -1.987864 | -0.462009 |
| C | -1.200988 | -1.529264 | -0.881494 | -0.193140 |
| C | 0.202254  | -1.465363 | -0.931655 | 0.401854  |
| C | 1.051317  | -2.708583 | -1.121974 | -0.374776 |
| C | 1.318732  | -3.030495 | -2.608550 | -0.457598 |
| N | 0.835300  | -0.275637 | -0.919853 | -0.474672 |
| C | 2.314552  | -0.099768 | -1.028278 | 0.039597  |
| N | 2.408540  | 1.241007  | -1.582914 | -0.434081 |
| C | 1.236682  | 1.940905  | -1.570618 | 0.612728  |
| C | 0.153972  | 1.031455  | -0.984241 | -0.079154 |
| C | 3.047617  | -0.273614 | 0.263889  | 0.382549  |
| O | 2.669903  | 0.518753  | 1.315439  | -0.481656 |
| C | 3.513113  | 0.241287  | 2.363219  | 0.359931  |
| C | 4.412308  | -0.713151 | 1.983159  | -0.216776 |
| C | 4.114623  | -1.044959 | 0.622721  | -0.203231 |
| C | 3.291877  | 1.003676  | 3.621379  | -0.532029 |
| C | -0.362768 | 1.554315  | 0.387839  | -0.358071 |
| C | -1.669271 | 2.326926  | 0.323326  | 0.155169  |
| C | -1.964882 | 3.209736  | -0.725199 | -0.197332 |
| C | -3.170505 | 3.914500  | -0.737357 | -0.132478 |
| C | -4.091529 | 3.761511  | 0.299661  | -0.126946 |

|   |           |           |           |           |
|---|-----------|-----------|-----------|-----------|
| C | -3.797406 | 2.901760  | 1.359284  | -0.130249 |
| C | -2.597589 | 2.189695  | 1.365441  | -0.201347 |
| O | 1.074689  | 3.089606  | -1.938377 | -0.486012 |
| C | 3.679570  | 1.817225  | -1.989637 | -0.337828 |
| H | -3.417531 | -0.638552 | 2.242874  | 0.185182  |
| H | -4.622035 | -2.419050 | 0.681848  | 0.192817  |
| H | -2.988829 | -4.414882 | 0.209455  | 0.187688  |
| H | -1.407784 | -3.596047 | -1.376257 | 0.178215  |
| H | -1.751064 | -0.599079 | -0.784683 | 0.171180  |
| H | -0.938492 | -1.458396 | 2.721140  | 0.185382  |
| H | -3.879995 | -3.430858 | -1.910692 | 0.171640  |
| H | -0.488959 | -3.516475 | 1.115354  | 0.183631  |
| H | -1.626230 | -4.079402 | 2.331134  | 0.221609  |
| H | -2.925840 | -2.462828 | -3.039041 | 0.187857  |
| H | -3.797354 | -1.662702 | -1.727255 | 0.175952  |
| H | 2.728712  | -0.821212 | -1.739969 | 0.179676  |
| H | -0.671211 | 0.964139  | -1.699455 | 0.198888  |
| H | 3.473817  | 2.826049  | -2.350075 | 0.221814  |
| H | 4.376756  | 1.865492  | -1.146526 | 0.185728  |
| H | 4.130801  | 1.227493  | -2.795534 | 0.173342  |
| H | 1.949965  | -3.920772 | -2.686771 | 0.185859  |
| H | 0.547163  | -3.564952 | -0.669139 | 0.170317  |
| H | 1.993105  | -2.598607 | -0.578171 | 0.183664  |
| H | 1.825726  | -2.211066 | -3.127794 | 0.172987  |
| H | 0.384354  | -3.226607 | -3.143098 | 0.171311  |
| H | -1.238669 | 3.371999  | -1.516785 | 0.177283  |
| H | 0.423051  | 2.169747  | 0.841629  | 0.196925  |
| H | -0.487362 | 0.691708  | 1.050483  | 0.151188  |
| H | -2.365164 | 1.537520  | 2.205374  | 0.110878  |
| H | -4.499059 | 2.788502  | 2.181481  | 0.139713  |
| H | -5.025529 | 4.315892  | 0.288745  | 0.149309  |
| H | -3.382515 | 4.595486  | -1.556884 | 0.151500  |
| H | 2.286489  | 0.833279  | 4.024837  | 0.173947  |
| H | 3.403469  | 2.082096  | 3.458388  | 0.193195  |
| H | 4.020091  | 0.694375  | 4.375025  | 0.188951  |
| H | 5.201493  | -1.124678 | 2.596517  | 0.167746  |
| H | 4.638693  | -1.753286 | -0.005559 | 0.163629  |

**TS14 (E)-c2δ-endo**

B3LYP/6-31G(d) energy= -1308.4109190000

Zero-point correction (ZPC)= 0.548751

HF/6-31G(d)// B3LYP/6-31G(d) energy= -1299.976618

CPCM:HF/6-31G(d)// B3LYP/6-31G(d) ( $\epsilon=78.39$ ) energy= -1300.031972

Number of Imaginary Frequencies=1

|   |           |           |           |           |
|---|-----------|-----------|-----------|-----------|
| C | -3.259359 | -2.531729 | -0.109354 | -0.195372 |
| C | -2.580173 | -1.561076 | -0.861311 | 0.153797  |
| C | -3.324819 | -0.692118 | -1.670032 | -0.206079 |
| C | -4.717921 | -0.780293 | -1.724347 | -0.129684 |
| C | -5.384761 | -1.740483 | -0.963180 | -0.126205 |
| C | -4.651145 | -2.615911 | -0.158992 | -0.129869 |
| C | -1.066239 | -1.467602 | -0.825773 | -0.369544 |
| C | -0.474132 | -1.417003 | 0.618399  | -0.073480 |
| N | 0.589037  | -0.420959 | 0.831973  | -0.476206 |
| C | 1.923872  | -1.094703 | 0.901081  | 0.053499  |
| N | 1.544737  | -2.465904 | 1.182300  | -0.444756 |
| C | 0.215722  | -2.727795 | 1.000659  | 0.605232  |
| C | 0.361952  | 0.880943  | 1.086770  | 0.406177  |
| C | 1.515629  | 1.735455  | 1.566734  | -0.383926 |
| C | 1.711336  | 1.664839  | 3.097441  | -0.456991 |
| C | 2.738659  | -0.973178 | -0.353422 | 0.376025  |
| C | 2.770445  | -1.658915 | -1.532136 | -0.207061 |
| C | 3.787211  | -1.042802 | -2.329070 | -0.213493 |
| C | 4.315098  | -0.025382 | -1.587671 | 0.356262  |

|   |           |           |           |           |
|---|-----------|-----------|-----------|-----------|
| O | 3.678097  | 0.027871  | -0.371945 | -0.485205 |
| C | 2.520067  | -3.484375 | 1.541140  | -0.337907 |
| O | -0.334588 | -3.808091 | 1.103446  | -0.488097 |
| C | 5.402476  | 0.963165  | -1.820409 | -0.531530 |
| C | -0.940530 | 1.404046  | 0.999134  | -0.201654 |
| C | -1.352996 | 2.685592  | 1.474607  | -0.149740 |
| C | -2.765962 | 2.778641  | 2.038473  | -0.464436 |
| C | -1.477763 | 3.929898  | -0.046480 | -0.178127 |
| C | -1.925963 | 3.026604  | -1.186972 | -0.335312 |
| C | -0.618335 | 2.555434  | -1.734961 | -0.096662 |
| C | 0.389869  | 3.389804  | -1.304833 | -0.096788 |
| C | -0.141548 | 4.280460  | -0.343156 | -0.074789 |
| H | 0.415810  | 5.070999  | 0.149883  | 0.186767  |
| H | 1.423600  | 3.357007  | -1.629074 | 0.177115  |
| H | -1.728916 | 0.749015  | 0.642906  | 0.172496  |
| H | -0.512370 | 1.756632  | -2.460436 | 0.188305  |
| H | -2.403878 | 3.668162  | -1.947207 | 0.220753  |
| H | -2.153658 | 4.666115  | 0.378355  | 0.186738  |
| H | -2.643782 | 2.240593  | -0.945546 | 0.194586  |
| H | -3.051379 | 3.809507  | 2.264438  | 0.175038  |
| H | -2.812633 | 2.209269  | 2.974256  | 0.192207  |
| H | -3.507000 | 2.350511  | 1.355943  | 0.177753  |
| H | -0.630542 | 3.228313  | 2.078490  | 0.176551  |
| H | -2.809742 | 0.042748  | -2.286418 | 0.113839  |
| H | -0.735864 | -0.575668 | -1.367232 | 0.154901  |
| H | -2.693027 | -3.232232 | 0.499942  | 0.177625  |
| H | -5.163057 | -3.375133 | 0.425530  | 0.154856  |
| H | -5.278604 | -0.104892 | -2.364857 | 0.142942  |
| H | -0.630938 | -2.326500 | -1.351074 | 0.193921  |
| H | -6.467743 | -1.812969 | -1.002935 | 0.152122  |
| H | 3.273908  | -3.597702 | 0.756067  | 0.185156  |
| H | 3.016697  | -3.226452 | 2.483274  | 0.177475  |
| H | 1.975017  | -4.421536 | 1.663220  | 0.221464  |
| H | 2.496898  | -0.676248 | 1.735014  | 0.190267  |
| H | 2.160442  | -2.510745 | -1.799792 | 0.169404  |
| H | 4.099659  | -1.333848 | -3.322212 | 0.167955  |
| H | 5.822310  | 0.822892  | -2.819457 | 0.189658  |
| H | 5.036007  | 1.994131  | -1.744469 | 0.170726  |
| H | 6.211658  | 0.846106  | -1.089860 | 0.191997  |
| H | -1.275399 | -1.233320 | 1.340367  | 0.205977  |
| H | 1.926096  | 0.646504  | 3.437554  | 0.170959  |
| H | 2.551270  | 2.300950  | 3.392221  | 0.184880  |
| H | 0.819391  | 2.006280  | 3.631513  | 0.170216  |
| H | 2.438069  | 1.449860  | 1.056449  | 0.201199  |
| H | 1.323069  | 2.772365  | 1.279202  | 0.165821  |

#### TS14 (E)-c2δ-exo

B3LYP/6-31G(d) energy= -1308.4081612000

Zero-point correction (ZPC)= 0.548624

HF/6-31G(d)// B3LYP/6-31G(d) energy= -1299.974156

CPCM:HF/6-31G(d)// B3LYP/6-31G(d) (ε=78.39) energy= -1300.030201

Number of Imaginary Frequencies=1

|   |           |           |           |           |
|---|-----------|-----------|-----------|-----------|
| C | -3.131738 | -1.329323 | -1.739728 | -0.200847 |
| C | -2.319709 | -1.848064 | -0.720895 | 0.155387  |
| C | -2.887223 | -2.736565 | 0.203392  | -0.198290 |
| C | -4.239477 | -3.075206 | 0.118777  | -0.132522 |
| C | -5.040597 | -2.545616 | -0.893549 | -0.126582 |
| C | -4.480150 | -1.675946 | -1.830696 | -0.130193 |
| C | -0.848915 | -1.469445 | -0.679182 | -0.359610 |
| C | -0.261726 | -1.278004 | 0.750131  | -0.085733 |
| N | 0.752750  | -0.212940 | 0.856004  | -0.471250 |
| C | 2.121885  | -0.819860 | 0.895233  | 0.052247  |
| N | 1.829172  | -2.175347 | 1.315208  | -0.445379 |

|   |           |           |           |           |
|---|-----------|-----------|-----------|-----------|
| C | 0.506234  | -2.510971 | 1.237991  | 0.610426  |
| C | 0.474005  | 1.089639  | 1.059117  | 0.395904  |
| C | 1.623234  | 2.008289  | 1.431896  | -0.387995 |
| C | 1.926731  | 1.995439  | 2.946492  | -0.456105 |
| C | 2.848244  | -0.775047 | -0.416862 | 0.378014  |
| C | 2.918986  | -1.615467 | -1.488781 | -0.205951 |
| C | 3.800756  | -0.993751 | -2.429750 | -0.215310 |
| C | 4.214662  | 0.182149  | -1.874283 | 0.359585  |
| O | 3.635877  | 0.327435  | -0.636511 | -0.486745 |
| C | 2.867986  | -3.101159 | 1.741237  | -0.337817 |
| O | 0.018171  | -3.595273 | 1.495116  | -0.483734 |
| C | 5.134560  | 1.264412  | -2.316712 | -0.532116 |
| C | -0.856936 | 1.543524  | 1.040237  | -0.192068 |
| C | -1.294527 | 2.827129  | 1.477212  | -0.145484 |
| C | -2.561220 | 2.902312  | 2.313862  | -0.461738 |
| C | -1.710962 | 3.974473  | -0.104557 | -0.197791 |
| C | -0.571607 | 3.688452  | -1.069475 | -0.337494 |
| C | -1.096563 | 2.520724  | -1.838691 | -0.097943 |
| C | -2.455236 | 2.421125  | -1.652852 | -0.093961 |
| C | -2.847181 | 3.360931  | -0.667091 | -0.050496 |
| H | -3.868645 | 3.521834  | -0.339430 | 0.191942  |
| H | -3.120199 | 1.724233  | -2.147879 | 0.184144  |
| H | -0.499564 | 1.921942  | -2.517617 | 0.185962  |
| H | -1.636421 | 0.825139  | 0.809582  | 0.169017  |
| H | -1.786329 | 4.928961  | 0.409595  | 0.187204  |
| H | -0.496130 | 4.550522  | -1.753883 | 0.221014  |
| H | -0.514679 | 3.493614  | 1.842194  | 0.178834  |
| H | -2.953781 | 3.921769  | 2.378638  | 0.171744  |
| H | -3.345178 | 2.246366  | 1.924407  | 0.175120  |
| H | -2.331973 | 2.572784  | 3.334771  | 0.187798  |
| H | 0.420263  | 3.549376  | -0.637710 | 0.183131  |
| H | -1.065270 | -1.073722 | 1.463120  | 0.201742  |
| H | 2.721754  | -0.306905 | 1.653165  | 0.189594  |
| H | -4.663027 | -3.766626 | 0.841824  | 0.152340  |
| H | -2.696763 | -0.667136 | -2.486252 | 0.114036  |
| H | -6.090392 | -2.816564 | -0.959008 | 0.150288  |
| H | -2.266014 | -3.188571 | 0.971768  | 0.177573  |
| H | -5.090439 | -1.271006 | -2.633551 | 0.141393  |
| H | 2.377434  | -4.045836 | 1.980366  | 0.221746  |
| H | 3.601774  | -3.259449 | 0.945204  | 0.184960  |
| H | 3.380075  | -2.721351 | 2.632612  | 0.176969  |
| H | -0.703961 | -0.534594 | -1.230209 | 0.155578  |
| H | -0.252207 | -2.225835 | -1.205058 | 0.187384  |
| H | 1.061011  | 2.328290  | 3.527016  | 0.169312  |
| H | 2.516774  | 1.744211  | 0.862399  | 0.205686  |
| H | 1.376492  | 3.030784  | 1.138306  | 0.167708  |
| H | 2.762053  | 2.668714  | 3.160821  | 0.186418  |
| H | 2.198298  | 0.998079  | 3.307108  | 0.171166  |
| H | 4.622398  | 2.232629  | -2.373366 | 0.173058  |
| H | 2.422430  | -2.570136 | -1.594078 | 0.170522  |
| H | 4.102214  | -1.382947 | -3.392171 | 0.168108  |
| H | 5.531356  | 1.030020  | -3.307474 | 0.189692  |
| H | 5.979713  | 1.377083  | -1.627385 | 0.190442  |

#### TS14 (Z)-b2a-endo

B3LYP/6-31G(d) energy= -1308.4136277000

Zero-point correction (ZPC)= 0.548659

HF/6-31G(d)// B3LYP/6-31G(d) energy= -1299.980265

CPCM:HF/6-31G(d)// B3LYP/6-31G(d) (ε=78.39) energy= -1300.036486

Number of Imaginary Frequencies=1

|   |          |           |          |           |
|---|----------|-----------|----------|-----------|
| C | 2.610416 | -2.289507 | 0.851624 | -0.209827 |
| C | 2.219766 | -1.064475 | 0.395078 | 0.382935  |
| O | 2.239032 | -0.158880 | 1.422834 | -0.481842 |

|   |           |           |           |           |
|---|-----------|-----------|-----------|-----------|
| C | 2.650491  | -0.823250 | 2.553357  | 0.358069  |
| C | 2.884582  | -2.133272 | 2.248780  | -0.220994 |
| C | 1.877287  | -0.568317 | -0.975543 | 0.049710  |
| N | 0.582007  | 0.165192  | -1.078515 | -0.473938 |
| C | 0.830928  | 1.610956  | -1.280897 | -0.080584 |
| C | 2.290690  | 1.634784  | -1.748437 | 0.611682  |
| N | 2.820166  | 0.398144  | -1.514487 | -0.437749 |
| C | -0.591635 | -0.478867 | -1.242227 | 0.415585  |
| C | -1.790815 | 0.322885  | -1.695679 | -0.380665 |
| C | -1.875636 | 0.435653  | -3.234231 | -0.460590 |
| C | 0.731909  | 2.522328  | -0.025856 | -0.375960 |
| C | -0.649577 | 2.822686  | 0.511668  | 0.164556  |
| C | -1.505499 | 3.708410  | -0.162258 | -0.194367 |
| C | -2.767716 | 4.011744  | 0.348869  | -0.125179 |
| C | -3.190605 | 3.446382  | 1.554740  | -0.131434 |
| C | -2.341652 | 2.578948  | 2.244518  | -0.141771 |
| C | -1.083686 | 2.266071  | 1.721437  | -0.194365 |
| O | 2.867799  | 2.607409  | -2.192512 | -0.489534 |
| C | 4.208914  | 0.058480  | -1.773782 | -0.337539 |
| C | 2.769867  | -0.018941 | 3.799664  | -0.536216 |
| C | -0.677715 | -1.877197 | -1.101696 | -0.189225 |
| C | -1.797012 | -2.681684 | -1.458651 | -0.142933 |
| C | -1.508232 | -4.081382 | -1.982264 | -0.463859 |
| C | -2.809667 | -3.126978 | 0.215090  | -0.177770 |
| C | -1.693597 | -3.201085 | 1.246483  | -0.328298 |
| C | -1.585788 | -1.775006 | 1.679714  | -0.101930 |
| C | -2.732479 | -1.098706 | 1.326817  | -0.096377 |
| C | -3.516779 | -1.942669 | 0.504236  | -0.077806 |
| H | -4.487155 | -1.683581 | 0.091980  | 0.185630  |
| H | -2.973786 | -0.076291 | 1.592353  | 0.185484  |
| H | -0.771531 | -1.382464 | 2.278246  | 0.185521  |
| H | 0.203838  | -2.409023 | -0.765765 | 0.148562  |
| H | -2.418334 | -4.677013 | -2.090632 | 0.178012  |
| H | -3.330473 | -4.019659 | -0.117194 | 0.183443  |
| H | -2.071121 | -3.792513 | 2.097967  | 0.219589  |
| H | -2.593364 | -2.188077 | -2.008249 | 0.178525  |
| H | -0.810404 | -4.624987 | -1.336976 | 0.167473  |
| H | -1.047464 | -4.001911 | -2.974429 | 0.190556  |
| H | -0.757443 | -3.666665 | 0.934195  | 0.182969  |
| H | 1.836007  | -1.446509 | -1.633576 | 0.176799  |
| H | 4.281404  | -0.746330 | -2.514845 | 0.172840  |
| H | 1.354782  | 2.084604  | 0.759256  | 0.181587  |
| H | 1.216714  | 3.456509  | -0.334290 | 0.206932  |
| H | 0.197658  | 1.995065  | -2.082127 | 0.195283  |
| H | 4.690058  | 0.955568  | -2.166221 | 0.222274  |
| H | 4.713696  | -0.254914 | -0.854176 | 0.183941  |
| H | 2.713831  | -3.192441 | 0.263860  | 0.161426  |
| H | 1.813257  | 0.435043  | 4.085431  | 0.177119  |
| H | 3.496622  | 0.793062  | 3.679834  | 0.196264  |
| H | 3.103637  | -0.657338 | 4.621326  | 0.189761  |
| H | 3.228679  | -2.894332 | 2.935066  | 0.167778  |
| H | -2.649428 | 2.162259  | 3.200423  | 0.145272  |
| H | -1.172776 | 4.181020  | -1.084488 | 0.146980  |
| H | -4.165132 | 3.697765  | 1.963207  | 0.154504  |
| H | -0.416763 | 1.604102  | 2.269785  | 0.130000  |
| H | -3.412624 | 4.705795  | -0.182611 | 0.156416  |
| H | -2.760981 | 1.015824  | -3.510987 | 0.185402  |
| H | -1.774443 | 1.316941  | -1.246439 | 0.205235  |
| H | -1.000132 | 0.938383  | -3.657435 | 0.174485  |
| H | -1.950177 | -0.548363 | -3.707388 | 0.165818  |
| H | -2.697070 | -0.159056 | -1.319986 | 0.166513  |

**TS14 (Z)-b2 $\alpha$ -exo**

B3LYP/6-31G(d) energy= -1308.4117545000

Zero-point correction (ZPC)= 0.548548

HF/6-31G(d)// B3LYP/6-31G(d) energy= -1299.978832

CPCM:HF/6-31G(d)// B3LYP/6-31G(d) ( $\epsilon$ =78.39) energy= -1300.035767

Number of Imaginary Frequencies=1

|   |           |           |           |           |
|---|-----------|-----------|-----------|-----------|
| C | -3.163944 | 1.012522  | 0.853893  | -0.341946 |
| C | -4.122688 | 0.280926  | -0.071072 | -0.198276 |
| C | -4.274270 | -1.006654 | 0.479949  | -0.053595 |
| C | -3.230354 | -1.266146 | 1.402299  | -0.097193 |
| C | -2.491824 | -0.117150 | 1.561198  | -0.089456 |
| C | -3.012422 | -0.052607 | -1.714849 | -0.140876 |
| C | -3.848097 | -1.033136 | -2.518917 | -0.461158 |
| C | -1.705783 | -0.447772 | -1.311072 | -0.181422 |
| C | -0.566209 | 0.376170  | -1.312629 | 0.402851  |
| C | -0.651137 | 1.832253  | -1.726091 | -0.380291 |
| C | -0.456499 | 2.010871  | -3.248230 | -0.459175 |
| N | 0.661797  | -0.135992 | -1.079425 | -0.471286 |
| C | 0.920182  | -1.604430 | -1.052798 | 0.051328  |
| N | 2.313751  | -1.676954 | -1.465443 | -0.438028 |
| C | 2.942170  | -0.467568 | -1.551530 | 0.612753  |
| C | 1.942363  | 0.605024  | -1.109966 | -0.081653 |
| C | 0.633363  | -2.284535 | 0.250583  | 0.383991  |
| O | 1.191046  | -1.764875 | 1.389460  | -0.481914 |
| C | 0.878589  | -2.610061 | 2.427074  | 0.357883  |
| C | 0.130357  | -3.649708 | 1.954487  | -0.224137 |
| C | -0.025703 | -3.441697 | 0.545642  | -0.207204 |
| C | 1.405086  | -2.248083 | 3.770949  | -0.535726 |
| C | 2.438558  | 1.180976  | 0.246703  | -0.371735 |
| C | 1.642269  | 2.326766  | 0.827109  | 0.160218  |
| C | 0.701731  | 2.100299  | 1.841014  | -0.198963 |
| C | -0.036079 | 3.155168  | 2.383673  | -0.138441 |
| C | 0.155826  | 4.456255  | 1.915088  | -0.130195 |
| C | 1.097953  | 4.696957  | 0.912064  | 0.124796  |
| C | 1.838079  | 3.641448  | 0.377226  | -0.194246 |
| O | 4.097667  | -0.261889 | -1.865939 | -0.489680 |
| C | 2.969456  | -2.941928 | -1.749084 | -0.337716 |
| H | -1.579188 | -1.494506 | -1.062653 | 0.150924  |
| H | -1.609305 | -0.007537 | 2.179417  | 0.182910  |
| H | -3.111112 | 0.970269  | -2.073574 | 0.181088  |
| H | -3.491257 | -1.036222 | -3.556441 | 0.187312  |
| H | -4.906512 | -0.755755 | -2.537951 | 0.173322  |
| H | -4.957655 | 0.794080  | -0.540655 | 0.185691  |
| H | -5.029516 | -1.726015 | 0.181453  | 0.187798  |
| H | -3.030696 | -2.220094 | 1.875618  | 0.178614  |
| H | -2.488317 | 1.740384  | 0.404160  | 0.194788  |
| H | -3.776044 | 1.566421  | 1.586174  | 0.218585  |
| H | -3.759570 | -2.054298 | -2.136382 | 0.166214  |
| H | 2.586497  | 3.842339  | -0.386730 | 0.147793  |
| H | -0.409515 | 5.279946  | 2.341325  | 0.153406  |
| H | -0.744738 | 2.965915  | 3.186070  | 0.137934  |
| H | 0.573392  | 1.089542  | 2.222094  | 0.131733  |
| H | 2.488599  | 0.356334  | 0.963560  | 0.181198  |
| H | 3.468979  | 1.497813  | 0.048148  | 0.203495  |
| H | 1.269321  | 5.709639  | 0.558231  | 0.156854  |
| H | 1.909940  | 1.390057  | -1.866442 | 0.195947  |
| H | 0.288374  | -2.086149 | -1.811086 | 0.176524  |
| H | -0.544196 | -4.083023 | -0.155112 | 0.161442  |
| H | -0.248550 | -4.477132 | 2.538167  | 0.166833  |
| H | 1.027323  | -1.275634 | 4.109666  | 0.176671  |
| H | 2.499858  | -2.191776 | 3.766083  | 0.196306  |
| H | 1.105283  | -3.003500 | 4.501421  | 0.189586  |
| H | 2.476162  | -3.458764 | -2.580818 | 0.172424  |
| H | 3.999604  | -2.713162 | -2.026194 | 0.222229  |
| H | 2.963294  | -3.592668 | -0.868700 | 0.183454  |

H -0.518843 3.072845 -3.503939 0.186497  
H 0.517262 1.641382 -3.585466 0.174233  
H 0.080056 2.426973 -1.178354 0.207143  
H -1.626949 2.235365 -1.447992 0.166583  
H -1.226365 1.476723 -3.813465 0.164750

**TS14 (Z)-b2δ-endo**

B3LYP/6-31G(d) energy= -1308.4121532000

Zero-point correction (ZPC)= 0.548793

HF/6-31G(d)// B3LYP/6-31G(d) energy= -1299.97826

CPCM:HF/6-31G(d)// B3LYP/6-31G(d) (ε=78.39) energy= -1300.033808

Number of Imaginary Frequencies=1

C 1.701053 3.238384 -0.617996 -0.331876  
C 0.595868 2.470522 -1.268658 -0.103124  
C -0.616914 3.014314 -0.907195 -0.097195  
C -0.394348 3.972522 0.110351 -0.078257  
C 0.959960 3.953847 0.501975 -0.178058  
C 1.023010 2.589304 1.965648 -0.143731  
C 2.311137 2.997635 2.666583 -0.463623  
C 0.990671 1.297360 1.366415 -0.201115  
C -0.141606 0.466041 1.274802 0.408490  
C -1.500845 0.967451 1.710300 -0.380384  
C -1.774325 0.705105 3.208038 -0.460794  
N -0.033156 -0.822147 0.890437 -0.467325  
C 1.285597 -1.525267 0.784659 0.053296  
N 0.938720 -2.878497 1.172762 -0.447663  
C -0.406801 -3.115902 1.230059 0.610608  
C -1.123660 -1.819017 0.833257 -0.087933  
C 1.938119 -1.471111 -0.567482 0.377405  
O 2.819944 -0.439606 -0.782438 -0.494109  
C 3.341997 -0.598462 -2.045412 0.356600  
C 2.798074 -1.708774 -2.621670 -0.213459  
C 1.896075 -2.277850 -1.666526 -0.206582  
C 4.355093 0.397526 -2.488632 -0.537677  
C -1.792693 -2.030241 -0.552628 -0.367566  
C -2.749353 -0.956246 -1.022115 0.167386  
C -2.419551 -0.120898 -2.096695 -0.194731  
C -3.320123 0.844745 -2.555905 -0.141270  
C -4.562023 0.994972 -1.936462 -0.131270  
C -4.905153 0.163705 -0.866865 -0.125642  
C -4.009049 -0.807669 -0.419997 -0.195099  
O -0.954475 -4.165136 1.503060 -0.487343  
C 1.943957 -3.879278 1.495148 -0.337532  
H 0.748334 1.685767 -2.000801 0.185153  
H -1.584255 2.722648 -1.299124 0.185654  
H -1.166527 4.576029 0.577485 0.185245  
H 1.401381 4.800938 1.017966 0.183085  
H 0.136580 2.892390 2.515595 0.177568  
H 1.941568 0.906258 1.025757 0.171809  
H 3.191978 2.820732 2.041022 0.169856  
H 2.426841 2.397419 3.577172 0.190303  
H 2.300775 4.049031 2.965663 0.176829  
H 2.574840 2.649457 -0.335550 0.187170  
H 2.050073 4.009656 -1.325715 0.216728  
H 1.964665 -1.081885 1.523217 0.187751  
H 2.541375 -3.564015 2.358591 0.176509  
H 1.314944 -3.182582 -1.780688 0.173976  
H 3.027640 -2.091628 -3.606253 0.170124  
H 5.222114 0.411723 -1.817570 0.190388  
H 4.706339 0.143327 -3.491690 0.193838  
H 3.944807 1.414631 -2.522256 0.166374  
H 2.608351 -4.054444 0.643700 0.183113  
H 1.411998 -4.799921 1.739992 0.221962

H -1.880749 -1.600918 1.587508 0.198129  
H -1.462128 -0.248501 -2.597470 0.132904  
H -1.004036 -2.178584 -1.296907 0.163600  
H -2.326322 -2.984124 -0.459056 0.207845  
H -4.299650 -1.471778 0.391978 0.147187  
H -5.878702 0.258041 -0.394276 0.156885  
H -5.266681 1.738658 -2.297202 0.155211  
H -1.751894 -0.362485 3.449514 0.174217  
H -2.764636 1.087607 3.472558 0.185260  
H -1.035430 1.201125 3.844903 0.166873  
H -1.558031 2.041717 1.517521 0.167381  
H -2.283838 0.515534 1.099307 0.203137  
H -3.059428 1.464315 -3.410259 0.147592

**TS14 (Z)-b2δ-exo**

B3LYP/6-31G(d) energy= -1308.4089392000

Zero-point correction (ZPC)= 0.548361

HF/6-31G(d)// B3LYP/6-31G(d) energy= -1299.975016

CPCM:HF/6-31G(d)// B3LYP/6-31G(d) (ε=78.39) energy= -1300.032055

Number of Imaginary Frequencies=1

C 2.448024 -0.517835 -1.987906 -0.197156  
C 3.009100 0.407602 -1.098225 0.165568  
C 4.280456 0.140690 -0.567137 -0.194341  
C 4.960745 -1.031558 -0.898843 -0.124558  
C 4.384737 -1.952379 -1.777674 -0.129636  
C 3.129151 -1.689414 -2.327838 -0.136730  
C 2.273451 1.676326 -0.732708 -0.369676  
C 1.575583 1.705905 0.656626 -0.082256  
N 0.362576 0.874387 0.801930 -0.478207  
C -0.863012 1.725956 0.710345 0.067034  
N -0.318868 3.062854 0.867454 -0.449483  
C 1.044759 3.124121 0.886447 0.612195  
C 0.314277 -0.403846 1.239803 0.398100  
C 1.607136 -1.027976 1.727012 -0.379830  
C 1.888850 -0.684486 3.207047 -0.459057  
C -1.694017 1.559590 -0.531550 0.372980  
C -1.524588 1.831350 -1.857942 -0.216390  
C -2.759009 1.497294 -2.501445 -0.214918  
C -3.609069 1.054772 -1.528140 0.351081  
O -2.965688 1.084908 -0.317685 -0.483314  
C -1.174656 4.228064 1.019534 -0.337334  
O 1.733561 4.118128 1.005833 -0.489828  
C -5.032061 0.616740 -1.524281 -0.534336  
C -0.913805 -1.074310 1.372369 -0.192722  
C -1.096948 -2.351639 1.974785 -0.143458  
C -2.328255 -2.571363 2.835924 -0.461785  
C -1.277726 -3.730461 0.526512 -0.198444  
C -2.510365 -3.412221 -0.077935 -0.053527  
C -2.305617 -2.515781 -1.155513 -0.096991  
C -0.952478 -2.360849 -1.345692 -0.090942  
C -0.212875 -3.325622 -0.479531 -0.342724  
H 0.736725 -2.959809 -0.088852 0.194260  
H -0.482629 -1.715374 -2.077651 0.184914  
H -3.085736 -2.016789 -1.717656 0.177637  
H -3.480845 -3.739467 0.279982 0.186813  
H -1.166278 -4.621434 1.138682 0.185986  
H -0.205584 -2.813521 2.395143 0.180817  
H 0.022789 -4.219887 -1.081730 0.219029  
H -2.523583 -3.633182 3.014697 0.172066  
H -2.167361 -2.098567 3.812821 0.187516  
H -3.220151 -2.118311 2.393280 0.169643  
H -1.817544 -0.558079 1.071906 0.171236  
H 4.920538 -2.857951 -2.046944 0.154933

|   |           |           |           |          |
|---|-----------|-----------|-----------|----------|
| H | 2.689992  | -2.385601 | -3.037675 | 0.141821 |
| H | 4.747877  | 0.863373  | 0.098761  | 0.148791 |
| H | 5.947928  | -1.217680 | -0.485538 | 0.158018 |
| H | 2.970842  | 2.521851  | -0.706453 | 0.209327 |
| H | 1.483402  | -0.299573 | -2.441776 | 0.127980 |
| H | 1.526234  | 1.909675  | -1.498734 | 0.161194 |
| H | 2.297620  | 1.471625  | 1.440428  | 0.197966 |
| H | -1.511300 | 1.482134  | 1.562889  | 0.190703 |
| H | -0.643233 | 2.245767  | -2.327543 | 0.171131 |
| H | -2.991900 | 1.599227  | -3.552369 | 0.167839 |
| H | -5.416897 | 0.596113  | -2.546911 | 0.189499 |
| H | -5.657454 | 1.301566  | -0.939180 | 0.195818 |
| H | -5.150424 | -0.383662 | -1.090741 | 0.166851 |
| H | -1.809098 | 4.362244  | 0.137638  | 0.184160 |
| H | -0.520528 | 5.093774  | 1.133615  | 0.221942 |
| H | -1.808599 | 4.130847  | 1.908535  | 0.175827 |
| H | 2.827868  | -1.151488 | 3.518871  | 0.186167 |
| H | 1.090912  | -1.050240 | 3.860515  | 0.165616 |
| H | 1.980820  | 0.394160  | 3.369870  | 0.173425 |
| H | 2.443794  | -0.715271 | 1.102413  | 0.206096 |
| H | 1.552128  | -2.113474 | 1.624560  | 0.166097 |

### 13 (E)-a1-endo

B3LYP/6-31G(d) energy= -1118.914745

Zero-point correction (ZPC)= 0.531645

Number of Imaginary Frequencies=0

|   |           |           |           |           |
|---|-----------|-----------|-----------|-----------|
| C | -4.041735 | -0.160210 | -1.687902 | -0.272245 |
| C | -4.479256 | 0.713507  | -0.491523 | -0.152159 |
| C | -4.769746 | -0.368420 | 0.534595  | -0.098302 |
| C | -3.895058 | -1.365997 | 0.332060  | -0.118389 |
| C | -3.028135 | -0.973435 | -0.849589 | -0.163775 |
| C | -3.114042 | 1.382134  | -0.059524 | -0.094982 |
| C | -2.833257 | 2.711434  | -0.770169 | -0.477674 |
| C | -2.069577 | 0.267403  | -0.425567 | -0.235809 |
| C | -1.044095 | -0.197273 | 0.569974  | 0.445652  |
| C | -1.368166 | -0.068560 | 2.033513  | -0.371212 |
| C | -0.925623 | 1.313439  | 2.585492  | -0.478893 |
| N | 0.075183  | -0.737445 | 0.136867  | -0.463908 |
| C | 0.524778  | -0.655954 | -1.287599 | -0.075317 |
| C | 1.685006  | -1.633626 | -1.359674 | 0.626255  |
| N | 1.948072  | -2.087947 | -0.105899 | -0.457321 |
| C | 1.021459  | -1.654009 | 0.944729  | 0.337886  |
| C | 1.002617  | 0.747561  | -1.764944 | -0.390139 |
| C | 2.077121  | 1.400031  | -0.919730 | 0.150157  |
| C | 3.425363  | 1.033622  | -1.054377 | -0.191222 |
| C | 4.406013  | 1.637565  | -0.265914 | -0.133596 |
| C | 4.057314  | 2.620901  | 0.662852  | -0.127062 |
| C | 2.721991  | 3.006962  | 0.792096  | -0.133993 |
| C | 1.741770  | 2.400022  | 0.003787  | -0.204203 |
| C | 1.781325  | -0.908866 | 2.049027  | -0.474538 |
| C | 0.248573  | -2.885680 | 1.454391  | -0.464095 |
| C | 3.071673  | -2.985493 | 0.142444  | -0.349145 |
| O | 2.289293  | -1.898680 | -2.382359 | -0.500317 |
| H | -3.772685 | -2.268995 | 0.920977  | 0.154725  |
| H | -5.501581 | -0.286944 | 1.331675  | 0.166513  |
| H | -5.275791 | 1.439446  | -0.664387 | 0.160126  |
| H | -2.482262 | -1.777049 | -1.348683 | 0.152300  |
| H | -3.589823 | 0.395895  | -2.516444 | 0.152980  |
| H | -4.849042 | -0.789989 | -2.069829 | 0.185893  |
| H | -3.145932 | 1.569097  | 1.015375  | 0.153612  |
| H | -2.844075 | 2.601275  | -1.860662 | 0.164105  |
| H | -3.592775 | 3.454092  | -0.505105 | 0.181128  |
| H | -1.857702 | 3.125003  | -0.486806 | 0.160118  |
| H | -1.575358 | 0.568210  | -1.345770 | 0.183112  |
| H | -0.899731 | -0.844065 | 2.632931  | 0.180096  |
| H | -2.449588 | -0.178395 | 2.147103  | 0.205278  |
| H | -1.212349 | 1.371368  | 3.639603  | 0.196805  |

|   |           |           |           |          |
|---|-----------|-----------|-----------|----------|
| H | 0.156081  | 1.446824  | 2.511420  | 0.186404 |
| H | -1.404152 | 2.143391  | 2.061021  | 0.184236 |
| H | 2.741959  | -3.935957 | 0.572006  | 0.182942 |
| H | 3.810122  | -2.521923 | 0.803148  | 0.187488 |
| H | 3.532567  | -3.177094 | -0.827447 | 0.229685 |
| H | 1.138089  | -0.633341 | 2.885067  | 0.174512 |
| H | 2.552282  | -1.573622 | 2.448835  | 0.187963 |
| H | 2.268262  | -0.014774 | 1.653244  | 0.209116 |
| H | 0.960498  | -3.592363 | 1.889067  | 0.194656 |
| H | -0.479579 | -2.652847 | 2.231488  | 0.180493 |
| H | -0.260835 | -3.384518 | 0.624784  | 0.180006 |
| H | -0.270673 | -1.015153 | -1.944670 | 0.211559 |
| H | 0.146055  | 1.421299  | -1.856201 | 0.175237 |
| H | 1.371029  | 0.564374  | -2.780584 | 0.217876 |
| H | 0.707809  | 2.728696  | 0.089180  | 0.127860 |
| H | 2.446057  | 3.791108  | 1.491657  | 0.151924 |
| H | 4.823678  | 3.097280  | 1.267244  | 0.159206 |
| H | 5.446362  | 1.350514  | -0.389496 | 0.159199 |
| H | 3.708081  | 0.284000  | -1.788319 | 0.170972 |

### 14 (Z)-b2a-endo

B3LYP/6-31G(d) energy= -1308.4460984

Zero-point correction (ZPC)= 0.553650

Number of Imaginary Frequencies=0

|   |           |           |           |           |
|---|-----------|-----------|-----------|-----------|
| C | -4.167666 | -0.483443 | 0.861060  | -0.103037 |
| C | -3.880414 | -1.888328 | 0.361223  | -0.150828 |
| C | -2.826665 | -2.331228 | 1.399998  | -0.272348 |
| C | -1.963103 | -1.060967 | 1.214685  | -0.157243 |
| C | -3.022253 | 0.015177  | 1.352519  | -0.117301 |
| C | -3.002574 | -1.723580 | -0.944170 | -0.094734 |
| C | -2.904665 | -2.998559 | -1.789510 | -0.466712 |
| C | -1.614207 | -1.284867 | -0.350951 | -0.226604 |
| C | -0.903425 | -0.113796 | -0.944588 | 0.445445  |
| C | -1.689707 | 1.075775  | -1.427182 | -0.383633 |
| C | -1.944759 | 1.005229  | -2.955503 | -0.476399 |
| N | 0.406627  | -0.112220 | -1.052629 | -0.422726 |
| C | 1.279198  | -1.347227 | -0.901080 | 0.028939  |
| N | 2.424754  | -0.986774 | -1.717483 | -0.439599 |
| C | 2.455740  | 0.314055  | -2.135202 | 0.619365  |
| C | 1.244309  | 1.024585  | -1.528553 | -0.097768 |
| C | 1.602685  | -1.741996 | 0.499070  | 0.384078  |
| C | 1.459145  | -2.926017 | 1.163165  | -0.197791 |
| C | 2.049685  | -2.740016 | 2.452412  | -0.214863 |
| C | 2.521409  | -1.459034 | 2.492358  | 0.364215  |
| O | 2.253602  | -0.837185 | 1.296124  | -0.485269 |
| C | 3.234192  | -0.655833 | 3.521313  | -0.536978 |
| C | 1.757084  | 1.987581  | -0.418738 | -0.379340 |
| C | 0.717103  | 2.834613  | 0.278255  | 0.154526  |
| C | 0.269677  | 4.035277  | -0.294346 | -0.194133 |
| C | -0.692673 | 4.815394  | 0.347842  | -0.124398 |
| C | -1.215032 | 4.411311  | 1.579340  | -0.128709 |
| C | -0.765149 | 3.227558  | 2.166761  | -0.134621 |
| C | 0.192980  | 2.443972  | 1.518247  | -0.199382 |
| O | 3.306696  | 0.847713  | -2.815667 | -0.478982 |
| C | 3.466147  | -1.953467 | -2.031798 | -0.339398 |
| H | -5.113698 | 0.034972  | 0.743078  | 0.163670  |
| H | -2.836739 | 1.020086  | 1.715919  | 0.160328  |
| H | -1.064469 | -0.960469 | 1.824645  | 0.158618  |
| H | -0.953817 | -2.151282 | -0.355720 | 0.165831  |
| H | -3.891393 | -3.280464 | -2.171129 | 0.180924  |
| H | -4.746804 | -2.536150 | 0.214289  | 0.157224  |
| H | -3.234685 | -2.400717 | 2.411463  | 0.180734  |
| H | -3.438852 | -0.935602 | -1.562564 | 0.156279  |
| H | -2.520574 | -3.844548 | -1.207727 | 0.157370  |
| H | -2.245848 | -2.859774 | -2.655352 | 0.151685  |

|   |           |           |           |          |
|---|-----------|-----------|-----------|----------|
| H | -2.306397 | -3.263403 | 1.153305  | 0.144969 |
| H | 0.751048  | -2.189176 | -1.362160 | 0.196267 |
| H | 3.049163  | -2.808844 | -2.575517 | 0.177422 |
| H | 2.316271  | 1.395622  | 0.310683  | 0.192687 |
| H | 2.482162  | 2.623968  | -0.939036 | 0.210891 |
| H | 0.713559  | 1.574440  | -2.304580 | 0.208451 |
| H | 4.195312  | -1.443485 | -2.662859 | 0.226831 |
| H | 3.956493  | -2.309818 | -1.120429 | 0.190306 |
| H | 1.002944  | -3.829710 | 0.780587  | 0.168391 |
| H | 2.653713  | 0.225414  | 3.819716  | 0.185905 |
| H | 4.203326  | -0.304020 | 3.149115  | 0.195842 |
| H | 3.409273  | -1.266260 | 4.410387  | 0.193686 |
| H | 2.123058  | -3.469845 | 3.246203  | 0.175130 |
| H | -1.145509 | 2.923303  | 3.138309  | 0.151028 |
| H | 0.690035  | 4.370052  | -1.240667 | 0.148294 |
| H | -1.954100 | 5.025414  | 2.085441  | 0.159157 |
| H | 0.557411  | 1.533583  | 1.988715  | 0.135660 |
| H | -1.021690 | 5.746709  | -0.104075 | 0.160391 |
| H | -2.553678 | 1.865471  | -3.247110 | 0.199797 |
| H | -1.176846 | 2.005670  | -1.180100 | 0.214341 |
| H | -1.015740 | 1.040078  | -3.532835 | 0.175188 |
| H | -2.482687 | 0.098077  | -3.243414 | 0.181056 |
| H | -2.644673 | 1.086425  | -0.899206 | 0.201642 |

**Protonated amine 1**

B3LYP/6-31G(d) energy= -691.3503907

Zero-point correction (ZPC)= 0.308285

Number of Imaginary Frequencies=0

|   |           |           |           |
|---|-----------|-----------|-----------|
| N | 0.820463  | -0.848357 | -1.047317 |
| C | 0.651394  | 0.610768  | -1.417906 |
| C | 1.193924  | 1.315320  | -0.166789 |
| N | 1.822038  | 0.383350  | 0.619044  |
| C | 1.911476  | -0.954067 | 0.046644  |
| C | -0.810399 | 0.965638  | -1.754905 |
| C | -1.798520 | 0.419930  | -0.743303 |
| C | -2.070013 | 1.111097  | 0.448729  |
| C | -2.952300 | 0.576736  | 1.387385  |
| C | -3.569323 | -0.656636 | 1.157260  |
| C | -3.308837 | -1.353233 | -0.022402 |
| C | -2.428712 | -0.817098 | -0.968536 |
| O | 1.063463  | 2.499425  | 0.057474  |
| C | 2.509701  | 0.759109  | 1.851853  |
| C | 1.513737  | -2.056452 | 1.026059  |
| C | 3.256965  | -1.226662 | -0.634737 |
| H | 1.311699  | 0.825754  | -2.263423 |
| H | 2.121010  | 0.195124  | 2.704321  |
| H | 2.319184  | 1.822034  | 2.006815  |
| H | 3.589896  | 0.599926  | 1.768392  |
| H | 2.270569  | -2.150908 | 1.809407  |
| H | 0.552577  | -1.835174 | 1.501453  |
| H | 1.453238  | -3.023398 | 0.515531  |
| H | 4.052101  | -1.208170 | 0.115457  |
| H | 3.490797  | -0.464886 | -1.385466 |
| H | 3.273258  | -2.217312 | -1.102489 |
| H | -0.840096 | 2.059678  | -1.792306 |
| H | -1.044458 | 0.600390  | -2.760869 |
| H | -2.277764 | -1.338610 | -1.913413 |
| H | -3.802776 | -2.300059 | -0.219959 |
| H | -4.261260 | -1.063834 | 1.888349  |
| H | -3.167007 | 1.129718  | 2.297143  |
| H | -1.599689 | 2.073358  | 0.630953  |
| H | -0.090866 | -1.167882 | -0.668490 |
| H | 1.049823  | -1.442797 | -1.849388 |

**Protonated amine 2**

B3LYP/6-31G(d) energy= -769.9661563

Zero-point correction (ZPC)= 0.365578

Number of Imaginary Frequencies=0

|   |           |           |           |           |
|---|-----------|-----------|-----------|-----------|
| N | 0.222048  | -0.157746 | -0.397001 | -0.671699 |
| C | -0.186896 | 1.301055  | -0.359187 | -0.087785 |
| C | 1.127814  | 1.985806  | 0.008398  | 0.632343  |
| N | 2.144426  | 1.052435  | -0.067307 | -0.461017 |
| C | 1.735591  | -0.221639 | -0.636831 | 0.187355  |
| C | -1.352730 | 1.549017  | 0.606534  | -0.390464 |
| C | -2.517863 | 0.619261  | 0.330561  | 0.144717  |
| C | -2.770865 | -0.467739 | 1.179835  | -0.222935 |
| C | -3.810257 | -1.360658 | 0.903813  | -0.123556 |
| C | -4.605008 | -1.176501 | -0.227580 | -0.125133 |
| C | -4.363407 | -0.093986 | -1.078462 | -0.123922 |
| C | -3.326353 | 0.796957  | -0.802711 | -0.195483 |
| O | 1.229026  | 3.152651  | 0.312174  | -0.457984 |
| C | 3.535344  | 1.506929  | -0.006870 | -0.349259 |
| C | 2.325643  | -1.538099 | -0.054178 | 0.039270  |
| C | 3.782559  | -1.707278 | -0.540673 | -0.466822 |
| C | 2.272319  | -1.546934 | 1.485094  | -0.474241 |
| C | 1.502777  | -2.719144 | -0.624710 | -0.483742 |
| H | -0.461107 | 1.576313  | -1.382751 | 0.229530  |
| H | 4.075603  | 1.030279  | 0.813715  | 0.194980  |
| H | 3.503205  | 2.583389  | 0.168980  | 0.234564  |
| H | 4.051121  | 1.309637  | -0.952097 | 0.188291  |
| H | -0.996323 | 1.429119  | 1.636960  | 0.184521  |
| H | -1.626000 | 2.603676  | 0.496087  | 0.228364  |
| H | -3.161168 | 1.649280  | -1.458986 | 0.148997  |
| H | -4.991104 | 0.063030  | -1.950692 | 0.168044  |
| H | -5.418007 | -1.864138 | -0.440049 | 0.169092  |
| H | -4.005543 | -2.187759 | 1.580037  | 0.164884  |
| H | -2.182403 | -0.593561 | 2.087865  | 0.140083  |
| H | 1.859626  | -0.229995 | -1.730388 | 0.191951  |
| H | -0.001464 | -0.592069 | 0.507475  | 0.406814  |
| H | -0.298728 | -0.687772 | -1.101056 | 0.418814  |
| H | 2.840815  | -0.721189 | 1.921783  | 0.184514  |
| H | 1.248252  | -1.495961 | 1.882268  | 0.137011  |
| H | 2.697488  | -2.482513 | 1.860480  | 0.196531  |
| H | 0.475344  | -2.759178 | -0.239907 | 0.141264  |
| H | 1.465434  | -2.700475 | -1.721317 | 0.169490  |
| H | 1.973319  | -3.663008 | -0.336022 | 0.202848  |
| H | 3.853363  | -1.643924 | -1.632859 | 0.166556  |
| H | 4.463895  | -0.972437 | -0.108329 | 0.176095  |
| H | 4.144841  | -2.697065 | -0.246631 | 0.187018  |

**Imidazolidinone 2 iminium intermediate**

B3LYP/6-31G(d) energy= -1003.4177967

Zero-point correction (ZPC)= 0.487732

Number of Imaginary Frequencies=0

|   |           |           |           |           |
|---|-----------|-----------|-----------|-----------|
| N | -0.700252 | 0.391095  | -0.228572 | -0.453736 |
| C | -0.127375 | -0.818540 | -0.892847 | -0.095020 |
| C | -1.374062 | -1.435548 | -1.544613 | 0.613233  |
| N | -2.472247 | -0.759504 | -1.094553 | -0.452227 |
| C | -2.185676 | 0.207020  | -0.047983 | 0.165306  |
| C | 0.632106  | -1.850880 | -0.017600 | -0.377733 |
| C | 2.099698  | -1.564709 | 0.222458  | 0.140319  |
| C | 2.566127  | -1.191006 | 1.489180  | -0.185916 |
| C | 3.921691  | -0.931895 | 1.702346  | -0.128753 |
| C | 4.829461  | -1.042554 | 0.647673  | -0.132078 |
| C | 4.377082  | -1.423168 | -0.619186 | -0.130692 |
| C | 3.022620  | -1.686893 | -0.828192 | -0.193804 |
| O | -1.344575 | -2.346931 | -2.345353 | -0.478953 |
| C | -3.799574 | -0.972021 | -1.656644 | -0.341373 |

|   |           |           |           |           |
|---|-----------|-----------|-----------|-----------|
| C | -2.664412 | -0.211999 | 1.411089  | 0.079336  |
| C | -4.066411 | 0.409577  | 1.610011  | -0.472220 |
| C | -0.084570 | 1.556251  | -0.117103 | 0.404019  |
| C | 1.334577  | 1.640989  | -0.382732 | -0.165516 |
| C | 2.057577  | 2.785632  | -0.333203 | -0.061037 |
| C | 3.519922  | 2.856169  | -0.602561 | -0.515942 |
| C | -0.866135 | 2.811640  | 0.202328  | -0.376681 |
| C | -1.300326 | 3.551715  | -1.085342 | -0.462197 |
| C | -2.771877 | -1.742191 | 1.570282  | -0.475078 |
| C | -1.728136 | 0.324624  | 2.514867  | -0.476375 |
| H | 0.521069  | -0.486833 | -1.707141 | 0.213913  |
| H | -4.468757 | -1.478960 | -0.955190 | 0.189119  |
| H | -3.675958 | -1.601221 | -2.539626 | 0.226403  |
| H | -4.244277 | -0.013837 | -1.947225 | 0.175964  |
| H | 4.037772  | 3.304706  | 0.255920  | 0.204637  |
| H | 3.714594  | 3.523905  | -1.453330 | 0.205098  |
| H | 3.955338  | 1.875384  | -0.807832 | 0.197278  |
| H | 1.579115  | 3.730483  | -0.083004 | 0.178583  |
| H | 1.862825  | 0.723246  | -0.609669 | 0.197334  |
| H | 0.112925  | -1.979758 | 0.935107  | 0.176097  |
| H | 0.528435  | -2.794699 | -0.566973 | 0.220242  |
| H | 2.683655  | -2.010381 | -1.810624 | 0.151872  |
| H | 5.081350  | -1.536191 | -1.438534 | 0.160673  |
| H | 5.885551  | -0.851307 | 0.814323  | 0.159684  |
| H | 4.268734  | -0.654301 | 2.693562  | 0.156314  |
| H | 1.868027  | -1.116476 | 2.320378  | 0.138592  |
| H | -1.955072 | 2.933460  | -1.708331 | 0.175470  |
| H | -1.850035 | 4.456719  | -0.811741 | 0.199346  |
| H | -0.438730 | 3.843077  | -1.691827 | 0.179739  |
| H | -2.669857 | 1.151190  | -0.304963 | 0.179023  |
| H | -0.244321 | 3.468185  | 0.814458  | 0.195635  |
| H | -1.742722 | 2.586854  | 0.807298  | 0.192540  |
| H | -3.465681 | -2.192551 | 0.856541  | 0.170029  |
| H | -1.809659 | -2.250424 | 1.464827  | 0.163172  |
| H | -3.145080 | -1.967750 | 2.574396  | 0.176804  |
| H | -0.710513 | -0.069751 | 2.426141  | 0.154156  |
| H | -1.673218 | 1.417478  | 2.539388  | 0.153873  |
| H | -2.115042 | 0.009697  | 3.489043  | 0.183568  |
| H | -4.034962 | 1.505254  | 1.560720  | 0.151668  |
| H | -4.784802 | 0.059383  | 0.861485  | 0.165402  |
| H | -4.460449 | 0.136445  | 2.593762  | 0.181044  |

|   |           |           |           |
|---|-----------|-----------|-----------|
| C | -3.260115 | -2.089008 | -0.121608 |
| C | -2.013459 | 2.895249  | 1.968993  |
| H | 1.156120  | -2.578399 | -0.439369 |
| H | -3.763011 | -1.226686 | 0.326997  |
| H | -3.302183 | -2.933556 | 0.567550  |
| H | -3.757844 | -2.355866 | -1.059286 |
| H | 0.446672  | -0.323410 | 1.518306  |
| H | 1.473162  | -1.722869 | 1.815765  |
| H | 3.738908  | -1.874782 | 0.577747  |
| H | 5.627554  | -0.600256 | -0.379459 |
| H | 5.351144  | 1.797768  | -0.969772 |
| H | 3.172054  | 2.925656  | -0.571550 |
| H | 1.286765  | 1.664157  | 0.426822  |
| H | -1.781446 | -0.892253 | -2.265540 |
| H | -2.766429 | 1.646739  | -2.551218 |
| H | -3.093683 | 3.677117  | -0.757605 |
| H | -2.452773 | 3.895320  | 1.958065  |
| H | -2.539530 | 2.295093  | 2.720231  |
| H | -0.967736 | 2.983114  | 2.286664  |
| H | 0.594149  | -0.001498 | -1.173146 |
| H | 0.398742  | -1.338150 | -2.122754 |

#### Protonated amine 5

B3LYP/6-31G(d) energy= -880.8667656

Zero-point correction (ZPC)= 0.330463

Number of Imaginary Frequencies=0

|   |           |           |           |
|---|-----------|-----------|-----------|
| O | -1.639890 | 1.006159  | 0.473463  |
| C | -1.855470 | 0.637057  | -0.832328 |
| C | -2.464339 | 1.654228  | -1.512137 |
| C | -2.636619 | 2.715166  | -0.573983 |
| C | -2.125103 | 2.282752  | 0.618825  |
| C | -1.449344 | -0.724633 | -1.234867 |
| N | -1.848517 | -1.803360 | -0.358921 |
| C | -0.845649 | -2.396824 | 0.368624  |
| C | 0.493153  | -1.796432 | -0.064166 |
| N | 0.108535  | -0.911178 | -1.238635 |
| C | 1.182039  | -0.990261 | 1.056283  |
| C | 2.367650  | -0.205137 | 0.536680  |
| C | 2.223607  | 1.153039  | 0.208065  |
| C | 3.293064  | 1.872202  | -0.336569 |
| C | 4.516490  | 1.240415  | -0.555504 |
| C | 4.671129  | -0.109494 | -0.225062 |
| C | 3.604167  | -0.828353 | 0.312308  |
| O | -0.966107 | -3.243066 | 1.225678  |
